# Supplementary material for: Azulenium chemistry: towards new derivatives of photochromic dihydroazulenes
Source: Royal Society of Chemistry journal article supplement (doi:10.1039/c5ob02523k), 2016-01-01
Supplement: c5ob02523k1.pdf [file c5ob02523k1.pdf]

**Azulenium chemistry**  
**– towards new derivatives of photochromic dihydroazulenes**

Anne Ugleholdt Petersen,<sup>a</sup> Martyn Jevric,<sup>a</sup> Jonas Elm,<sup>a</sup> Stine T. Olsen, Christian G. Tortzen,  
Anders Kadziola,<sup>a</sup> Kurt V. Mikkelsen,<sup>a</sup> and Mogens Brøndsted Nielsen<sup>a,\*</sup>

a) Department of Chemistry, University of Copenhagen, Universitetsparken 5, DK-2100  
Copenhagen Ø, Denmark. E-mail: mbn@chem.ku.dk

**ELECTRONIC SUPPLEMENTARY INFORMATION**

**Table of Contents:**

|                                                                                                   |            |
|---------------------------------------------------------------------------------------------------|------------|
| <b>Synthesis – Reactions of azulenium salts 4-7 with lithium triisopropylsilylacetylide .....</b> | <b>S2</b>  |
| <b>NMR Spectra .....</b>                                                                          | <b>S7</b>  |
| <b>UV-Vis Absorption Spectra .....</b>                                                            | <b>S64</b> |
| <b>Calculational Data .....</b>                                                                   | <b>S67</b> |

## Synthesis – Reactions of azulenium salts 4-7 with lithium triisopropylsilylacetylide

*Reaction of 4 with lithium triisopropylsilylacetylide:* To a degassed solution of triisopropylsilylacetylene (1.60 mL, 7.13 mmol) in Et<sub>2</sub>O (30 mL) at -40 °C was added a solution of LiHMDS (3.2 mL, 1.0 M in toluene, 3.2 mmol) and the contents of the vessel allowed to reach -20 °C. The solution was cooled to -78 °C and then added via cannula to a degassed suspension of **4** (1.01 g, 2.69 mmol) in THF (80 mL) at -78 °C. The reaction mixture was stirred for 2 h at -78 °C, quenched with saturated aqueous NH<sub>4</sub>Cl (50 mL) and allowed to reach ambient temperature. The reaction mixture was diluted with Et<sub>2</sub>O (100 mL) and water (50 mL) and the phases separated. The aqueous phase was extracted with Et<sub>2</sub>O (50 mL) and dried over MgSO<sub>4</sub> and filtered. The solvent was removed under reduced pressure to give a crude residue, which was purified by flash chromatography (toluene/heptane 4:1) to give a regioisomeric mixture of **16** (715 mg, 57%). M.p. = 67-73 °C. R<sub>f</sub> = 0.52 (toluene/heptane 4:1). Anal. calcd (%) for C<sub>30</sub>H<sub>34</sub>N<sub>2</sub>OSi (466.70): C 77.21, H 7.34, N 6.00; found C 77.04, H 7.12, N 6.09. HRMS (MALDI +ve) calcd for C<sub>30</sub>H<sub>33</sub>N<sub>2</sub>OSi [(M-H)<sup>+</sup>]: *m/z* = 465.2357; found *m/z* = 465.2374. Mixture **16** was subject to repeated flash column chromatography (EtOAc/heptane) to isolate small portions of the following regioisomers.

*2-(4-Methoxyphenyl)-4-[(triisopropylsilyl)ethynyl]-1,4-dihydroazulene-1,1-dicarbonitrile (16a):* A pale yellow solid. M.p. = 65-68 °C. R<sub>f</sub> = 0.39 (3:17 EtOAc/heptane). <sup>1</sup>H NMR (500 MHz, CDCl<sub>3</sub>) δ = 7.60 (d, *J* = 8.9 Hz, 2H), 7.12 (s, 1H), 6.99 (d, *J* = 8.9 Hz, 2H), 6.92 (d, *J* = 11.2 Hz, 1H), 6.79 (dd, *J* = 11.2, 6.1 Hz, 1H), 6.27 (ddd, *J* = 9.7, 6.1, 1.2 Hz, 1H), 5.43 (dd, *J* = 9.7, 4.9 Hz, 1H), 3.86 (s, 3H), 3.44 (dd, *J* = 4.9, 1.2 Hz, 1H), 1.14 (br s, 21H). <sup>13</sup>C NMR (125 MHz, CDCl<sub>3</sub>) δ = 160.9, 142.2, 139.8, 132.9, 131.6, 130.4, 127.2, 127.1, 124.7, 123.1, 122.5, 115.1, 112.4, 112.2, 105.4, 85.0, 55.6, 43.4, 32.3, 18.8, 11.4 ppm. HRMS (MALDI +ve) calcd for C<sub>30</sub>H<sub>33</sub>N<sub>2</sub>OSi [(M-H)<sup>+</sup>]: *m/z* = 465.2357; found *m/z* = 465.2355. Anal. calcd (%) for C<sub>30</sub>H<sub>34</sub>N<sub>2</sub>OSi (466.70): C 77.21, H 7.34, N 6.00; found C 77.16, H 7.50, N 5.96.

*2-(4-Methoxyphenyl)-5-[(triisopropylsilyl)ethynyl]-1,4-dihydroazulene-1,1-dicarbonitrile (16b):* A yellow oil. R<sub>f</sub> = 0.36 (3:17 EtOAc/heptane). <sup>1</sup>H NMR (500 MHz, CDCl<sub>3</sub>) δ = 7.64 (d, *J* = 8.9 Hz, 2H), 7.15 (d, *J* = 6.5 Hz, 1H), 6.99 (d, *J* = 8.9 Hz, 2H), 6.86 (s, 1H), 6.33 (ddd, *J* = 9.5, 6.5, 1.3 Hz, 1H), 5.54 (dd, *J* = 9.5, 5.4 Hz, 1H), 5.47 (d, *J* = 5.4 Hz, 1H), 3.86 (s, 3H), 3.22 (ddd, *J* = 5.4, 5.4, 1.3 Hz, 1H), 1.10-1.09 (m, 21H). <sup>13</sup>C NMR (125 MHz, CDCl<sub>3</sub>) δ = 161.0, 139.6, 138.5, 136.4, 129.7, 129.3, 127.6, 125.9, 123.5, 122.9, 117.0, 114.9, 114.3, 113.6, 107.9, 82.1, 55.6, 44.0, 32.4, 18.8, 11.3 ppm. HRMS (MALDI +ve) calcd for C<sub>30</sub>H<sub>33</sub>N<sub>2</sub>OSi [(M-H)<sup>+</sup>]: *m/z* = 465.2357; found *m/z* = 465.2354.

*2-(4-Methoxyphenyl)-6-[(triisopropylsilyl)ethynyl]-1,4-dihydroazulene-1,1-dicarbonitrile (16c):* A yellow oil. R<sub>f</sub> = 0.33 (3:17 EtOAc/heptane). <sup>1</sup>H NMR (500 MHz, CDCl<sub>3</sub>) δ = 7.67 (d, *J* = 8.9 Hz, 2H), 7.00 (d, *J* = 8.9 Hz, 2H), 6.97 (s, 1H), 6.72 (br d, *J* = 9.3 Hz, 1H), 6.48 (dd, *J* = 9.2, 1.2 Hz, 1H), 5.57 (dd, *J* = 9.2, 5.7 Hz, 1H), 5.52 (dd, *J* = 9.3, 5.7 Hz, 1H), 3.87 (s, 3H), 2.90 (dddd, *J* = 5.7, 5.7, 1.2, 1.2 Hz, 1H), 1.10 (m, 21H). <sup>13</sup>C NMR (125 MHz, CDCl<sub>3</sub>) δ = 161.0, 146.5, 139.5, 136.3, 131.2, 127.5, 126.7, 124.4, 122.7, 121.6, 119.7, 115.0, 112.6, 112.6, 107.9, 82.1, 55.6, 44.3, 33.3, 18.8, 11.3 ppm. HRMS (MALDI +ve) calcd for C<sub>30</sub>H<sub>33</sub>N<sub>2</sub>OSi [(M-H)<sup>+</sup>]: *m/z* = 465.2357; found *m/z* = 465.2354.

*2-(4-Methoxyphenyl)-7-[(triisopropylsilyl)ethynyl]-1,4-dihydroazulene-1,1-dicarbonitrile (16d)*: A yellow oil.  $R_f = 0.28$  (3:17 EtOAc/heptane).  $^1\text{H NMR}$  (500 MHz,  $\text{CDCl}_3$ )  $\delta = 7.64$  (d,  $J = 9.0$  Hz, 2H), 7.00 (d,  $J = 9.0$  Hz, 2H), 6.99 (s, 1H), 6.64 (d,  $J = 6.5$  Hz, 1H), 6.32 (ddd,  $J = 9.7, 6.5, 1.0$  Hz, 1H), 6.18 (d,  $J = 5.4$  Hz, 1H), 5.41 (dd,  $J = 9.7, 5.4$  Hz, 1H), 3.87 (s, 3H), 3.39 (td,  $J = 5.4, 1.0$  Hz, 1H), 1.10-1.09 (m, 21H).  $^{13}\text{C NMR}$  (125 MHz,  $\text{CDCl}_3$ )  $\delta = 161.0, 141.4, 137.0, 136.1, 132.8, 127.8, 126.5, 126.1, 125.8, 123.7, 122.9, 115.0, 114.1, 113.5, 107.1, 82.5, 55.6, 42.5, 32.2, 18.8, 11.3$  ppm. HRMS (MALDI +ve) calcd for  $\text{C}_{30}\text{H}_{33}\text{N}_2\text{OSi}$  [(M-H) $^+$ ]:  $m/z = 465.2357$ ; found  $m/z = 465.2354$ .

*2-(4-Methoxyphenyl)-8-[(triisopropylsilyl)ethynyl]-1,4-dihydroazulene-1,1-dicarbonitrile (16e)*: A yellow solid. M.p. = 94-96 °C.  $R_f = 0.25$  (3:17 EtOAc/heptane).  $^1\text{H NMR}$  (500 MHz,  $\text{CDCl}_3$ )  $\delta = 7.63$  (d,  $J = 8.9$  Hz, 2H), 6.97 (d,  $J = 8.9$  Hz, 2H), 6.87 (s, 1H), 6.75 (dd,  $J = 10.6, 6.3$  Hz, 1H), 6.68 (d,  $J = 10.6$  Hz, 1H), 6.20 (dddd,  $J = 9.1, 6.3, 0.9, 0.9$  Hz, 1H), 5.34 (dd,  $J = 9.2, 6.3$  Hz, 1H), 3.85 (s, 3H), 3.70 (dd,  $J = 6.3, 0.9$  Hz, 1H), 1.12 (s, 21H) ppm.  $^{13}\text{C NMR}$  (125 MHz,  $\text{CDCl}_3$ )  $\delta = 160.6, 141.3, 138.5, 133.3, 130.4, 127.4, 125.7, 124.0, 122.9, 114.8, 112.4, 112.2, 102.2, 86.9, 55.6, 43.8, 28.7, 18.8, 11.4$  ppm, 2Cs masked. HRMS (MALDI +ve) calcd for  $\text{C}_{30}\text{H}_{33}\text{N}_2\text{OSi}$  [(M-H) $^+$ ]:  $m/z = 465.2357$ ; found  $m/z = 465.2362$ .

*Reaction of 5 with lithium triisopropylsilylacetylide*: To a degassed solution of triisopropylsilylacetylene (1.2 mL, 5.35 mmol) at -40 °C in  $\text{Et}_2\text{O}$  (25 mL) was added LiHMDS (2.4 mL, 1.0 M in toluene, 2.4 mmol) and the vessel allowed to warm to -20 °C. The reaction contents were cooled to -78 °C and added via cannula to a vessel containing a degassed suspension of **3** (620 mg, 1.69 mmol) in THF (50 mL) at -78 °C. The reaction mixture was stirred for 1 h at -78 °C, quenched with saturated aqueous  $\text{NH}_4\text{Cl}$  (50 mL) and allowed to warm to ambient temperature. The reaction mixture was diluted with  $\text{Et}_2\text{O}$  (100 mL) and water (50 mL) and the phases separated. The aqueous component was extracted with  $\text{Et}_2\text{O}$  (50 mL) and the combined organic extracts were dried over  $\text{MgSO}_4$  and filtered. The solvent was removed under reduced pressure and the crude residue was purified by flash column chromatography (toluene) to give a regioisomeric mixture of **17** (315 mg, 40%) as a yellow oil. Anal. calcd (%) for  $\text{C}_{30}\text{H}_{31}\text{N}_3\text{Si}$  (461.68): C 78.05, H 6.77, N 9.10; found C 77.93, H 6.63, N 9.04. Mixture **17** was subject to repeated flash column chromatography (EtOAc/heptane) to isolate small portions of the following regioisomers.

*2-(4-Cyanophenyl)-4-[(triisopropylsilyl)ethynyl]-1,4-dihydroazulene-1,1-dicarbonitrile (17a)*: A yellowish oil.  $R_f = 0.33$  (1:9 EtOAc/heptane).  $^1\text{H NMR}$  (500 MHz,  $\text{CDCl}_3$ )  $\delta = 7.77$  (d,  $J = 8.5$  Hz, 2H), 7.73 (d,  $J = 8.5$  Hz, 2H), 7.46 (s, 1H), 6.96 (d,  $J = 11.2$  Hz, 1H), 6.91 (dd,  $J = 11.2, 5.9$  Hz, 1H), 6.33 (ddd,  $J = 9.7, 5.9, 1.3$  Hz, 1H), 5.49 (dd,  $J = 9.7, 4.9$  Hz, 1H), 3.47 (dd,  $J = 4.9, 1.3$  Hz, 1H), 1.15 (s, 21H) ppm.  $^{13}\text{C NMR}$  (125 MHz,  $\text{CDCl}_3$ )  $\delta = 139.8, 138.7, 136.4, 134.9, 134.2, 134.1, 133.3, 127.3, 125.7, 125.6, 122.2, 118.2, 112.9, 111.5, 111.3, 104.7, 85.7, 43.2, 32.1, 18.8, 11.3$  ppm. HRMS (MALDI +ve) calcd for  $\text{C}_{30}\text{H}_{30}\text{N}_3\text{Si}$  [(M-H) $^+$ ]:  $m/z = 460.2204$ ; found  $m/z = 460.2209$ .

*2-(4-Cyanophenyl)-5-[(triisopropylsilyl)ethynyl]-1,4-dihydroazulene-1,1-dicarbonitrile (17b)*: A yellow solid. M.p. = 107.5-112 °C (decomposes).  $R_f = 0.21$  (EtOAc/heptane 1:9).  $^1\text{H NMR}$  (500 MHz,  $\text{CDCl}_3$ )  $\delta = 7.80$  (d,  $J = 8.5$  Hz, 2H), 7.77 (d,  $J = 8.5$  Hz, 2H), 7.21 (d,  $J = 6.6$  Hz, 1H), 7.17 (s, 1H), 6.39 (ddd,  $J = 9.6, 6.6, 1.2$  Hz, 1H), 5.63 (d,  $J = 5.5$  Hz, 1H), 5.54 (dd,  $J = 9.6, 5.5$  Hz, 1H), 3.22 (ddd,  $J = 5.5, 5.5, 1.2$  Hz, 1H), 1.09 (s, 21H) ppm.  $^{13}\text{C}$

NMR (125 MHz, CDCl<sub>3</sub>)  $\delta$  = 138.8, 137.5, 135.4, 134.7, 134.6, 133.2, 130.0, 126.5, 125.4, 123.9, 119.5, 118.2, 113.6, 113.3, 112.9, 107.1, 82.7, 43.7, 32.4, 18.8, 11.3 ppm. HRMS (MALDI +ve) calcd for C<sub>30</sub>H<sub>30</sub>N<sub>3</sub>Si [(M-H)<sup>+</sup>]:  $m/z$  = 460.2204; found  $m/z$  = 460.2217.

*2-(4-Cyanophenyl)-6-[(triisopropylsilyl)ethynyl]-1,4-dihydroazulene-1,1-dicarbonitrile (17c)*: A yellowish solid. M.p. = 151-153 °C.  $R_f$  = 0.19 (EtOAc/heptane 1:9). <sup>1</sup>H NMR (500 MHz, CDCl<sub>3</sub>)  $\delta$  = 7.83 (d,  $J$  = 8.6 Hz, 1H), 7.77 (d,  $J$  = 8.6 Hz, 1H), 7.31 (s, 1H), 6.77 (d,  $J$  = 9.2 Hz, 1H), 6.54 (d,  $J$  = 9.2 Hz, 1H), 5.63 (dd,  $J$  = 9.2, 5.8 Hz, 2H), 2.94 (dddd,  $J$  = 5.8, 5.8, 1.2, 1.2 Hz, 1H), 1.09 (s, 21H) ppm. <sup>13</sup>C NMR (125 MHz, CDCl<sub>3</sub>)  $\delta$  = 145.6, 138.4, 137.3, 137.0, 133.9, 133.2, 127.3, 126.3, 126.2, 121.4, 119.6, 118.2, 113.1, 111.7, 111.7, 107.2, 82.5, 44.1, 33.3, 18.7, 11.3 ppm. HRMS (MALDI +ve) calcd for C<sub>30</sub>H<sub>30</sub>N<sub>3</sub>Si [(M-H)<sup>+</sup>]:  $m/z$  = 460.2204; found  $m/z$  = 460.2214.

*2-(4-Cyanophenyl)-7-[(triisopropylsilyl)ethynyl]-1,4-dihydroazulene-1,1-dicarbonitrile (17d)*: A yellowish solid. M.p. = 126-135 °C (decomposes).  $R_f$  = 0.10 (EtOAc/heptane 1:9). <sup>1</sup>H NMR (500 MHz, CDCl<sub>3</sub>)  $\delta$  = 7.79 (s, 4H), 7.28 (s, 1H), 6.81 (d,  $J$  = 6.5 Hz, 1H), 6.39 (dd,  $J$  = 9.8, 6.5 Hz, 1H), 6.22 (d,  $J$  = 5.5 Hz, 1H), 5.50 (dd,  $J$  = 9.8, 5.5 Hz, 1H), 3.42 (dd,  $J$  = 5.5, 5.5 Hz, 1H), 1.08 (s, 21H). <sup>13</sup>C NMR (125 MHz, CDCl<sub>3</sub>)  $\delta$  = 140.4, 138.2, 135.5, 135.2, 134.4, 133.2, 128.7, 126.6, 126.6, 126.4, 125.2, 118.2, 113.4, 113.3, 112.8, 106.3, 83.0, 42.2, 32.1, 18.8, 11.3 ppm. HRMS (MALDI +ve) calcd for C<sub>30</sub>H<sub>30</sub>N<sub>3</sub>Si [(M-H)<sup>+</sup>]:  $m/z$  = 460.2204; found  $m/z$  = 460.2210.

*2-(4-Cyanophenyl)-8-[(triisopropylsilyl)ethynyl]-1,4-dihydroazulene-1,1-dicarbonitrile (17e)*: A yellow solid. M.p. = 152.5-154 °C.  $R_f$  = 0.05 (EtOAc/heptane 1:9). <sup>1</sup>H NMR (500 MHz, CDCl<sub>3</sub>)  $\delta$  = 7.78 (d,  $J$  = 6.6 Hz, 2H), 7.75 (d,  $J$  = 6.6 Hz, 2H), 7.20 (s, 1H), 6.84 (dd,  $J$  = 10.7, 6.3 Hz, 1H), 6.75 (d,  $J$  = 10.7 Hz, 1H), 6.26 (ddd,  $J$  = 9.2, 6.3, 0.7 Hz, 1H), 5.42 (dd,  $J$  = 9.2, 6.0 Hz, 1H), 3.73 (dd,  $J$  = 6.0, 0.7 Hz, 1H), 1.13 (s, 21H) ppm. <sup>13</sup>C NMR (125 MHz, CDCl<sub>3</sub>)  $\delta$  = 140.8, 136.8, 136.0, 134.3, 134.1, 133.2, 126.3, 124.0, 118.3, 112.8, 111.5, 111.4, 101.7, 87.8, 29.4, 18.8, 11.4 ppm, 4Cs masked. HRMS (MALDI +ve) calcd for C<sub>30</sub>H<sub>30</sub>N<sub>3</sub>Si [(M-H)<sup>+</sup>]:  $m/z$  = 460.2204; found  $m/z$  = 460.2209.

*Reaction of 6 with lithium triisopropylsilylacetylide*: To a degassed solution of triisopropylsilylacetylene (1.6 mL, 7.13 mmol) at -40 °C in Et<sub>2</sub>O (30 mL) was added LiHMDS (3.2 mL, 1.0 M in toluene, 3.2 mmol) and the vessel allowed to warm to -20 °C. The reaction contents were cooled to -78 °C and added via cannula to a vessel containing a degassed suspension of **6** (1.00 g, 2.39 mmol) in THF (80 mL) at -78 °C. The reaction mixture was stirred for 1 h at -78 °C, quenched with saturated aqueous NH<sub>4</sub>Cl (50 mL) and allowed to warm to ambient temperature. The reaction mixture was diluted with Et<sub>2</sub>O (100 mL) and water (50 mL) and the phases separated. The aqueous component was extracted with Et<sub>2</sub>O (50 mL) and the combined organic extracts were dried over Na<sub>2</sub>SO<sub>4</sub> and filtered. The solvent was removed under reduced pressure and the crude residue was purified by flash column chromatography (toluene/heptane 1:1) to give a regioisomeric mixture of **18** (544 mg, 44%) as a yellow oil. Anal. calcd (%) for C<sub>29</sub>H<sub>32</sub>N<sub>2</sub>Si (436.67): C 81.98, H 7.08, N 5.46; found C 81.84, H 6.99, N 5.45. This mixture was then subjected to further flash chromatography (EtOAc/heptane 1:19) to give a pure sample of **18c**. Compounds **18b** and **18d** were isolated as a mixture ( $R_f$  = 0.57 in EtOAc/heptane 1:9) and small amounts could be separated by flash column chromatography (chlorobenzene/heptane 2:1). Compounds **18a** and **18e** were isolated as a mixture ( $R_f$  = 0.50 in



EtOAc/heptane 1:9) and small amounts could be separated by flash column chromatography (chlorobenzene/CS<sub>2</sub> 1:1).

*2,3-Diphenyl-4-[(triisopropylsilyl)ethynyl]-1,4-dihydroazulene-1,1-dicarbonitrile (18a)*: A yellowish oil.  $R_f = 0.52$  (chlorobenzene/CS<sub>2</sub> 1:1). <sup>1</sup>H NMR (500 MHz, CDCl<sub>3</sub>)  $\delta = 7.45-7.43$  (m, 3H), 7.37-7.35 (m, 2H), 7.29-7.26 (m, 5H), 6.98 (d,  $J = 11.3$  Hz, 1H), 6.87 (dd,  $J = 11.3, 6.5$  Hz, 1H), 6.38 (dd,  $J = 9.3, 6.5$  Hz, 1H), 5.61 (dd,  $J = 9.3, 9.3$  Hz, 1H), 4.18 (d,  $J = 9.3$  Hz, 1H), 0.99-0.98 (m, 21H) ppm. <sup>13</sup>C NMR (125 MHz, CDCl<sub>3</sub>)  $\delta = 147.8, 141.4, 136.5, 134.0, 133.4, 132.6, 131.1, 129.5, 129.3, 129.2, 129.0, 128.9, 128.8, 128.5, 123.3, 122.1, 112.6, 111.9, 102.7, 83.1, 45.4, 28.5, 18.7, 11.2$  ppm. HRMS (MALDI +ve) calcd for C<sub>35</sub>H<sub>36</sub>N<sub>2</sub>Si [M<sup>+</sup>]:  $m/z = 511.2564$ ; found  $m/z = 511.2570$ .

*2,3-Diphenyl-5-[(triisopropylsilyl)ethynyl]-1,4-dihydroazulene-1,1-dicarbonitrile (18b)*: A yellowish oil.  $R_f = 0.36$  (chlorobenzene/heptane 7:3). <sup>1</sup>H NMR (500 MHz, CDCl<sub>3</sub>)  $\delta = 7.37-7.35$  (m, 5H), 7.33-7.28 (m, 3H), 7.23-7.19 (m, 3H), 6.37 (ddd,  $J = 9.9, 6.5, 1.3$  Hz, 1H), 5.52 (dd,  $J = 9.9, 5.5$  Hz, 1H), 5.28 (d,  $J = 5.5$  Hz, 1H), 3.18 (ddd,  $J = 5.5, 5.5, 1.3$  Hz, 1H), 1.05 (m, 21H) ppm. <sup>13</sup>C NMR (125 MHz, CDCl<sub>3</sub>)  $\delta = 145.7, 140.9, 138.0, 132.1, 131.7, 131.3, 129.3, 129.2, 129.0, 129.0, 128.9, 128.9, 125.0, 123.6, 117.7, 114.0, 113.9, 107.8, 82.3, 46.4, 32.0, 18.7, 11.3$  ppm, 1C masked. HRMS (MALDI +ve) calcd for C<sub>35</sub>H<sub>36</sub>N<sub>2</sub>Si [M<sup>+</sup>]:  $m/z = 511.2564$ ; found  $m/z = 511.2562$ .

*2,3-Diphenyl-6-[(triisopropylsilyl)ethynyl]-1,4-dihydroazulene-1,1-dicarbonitrile (18c)*: A yellowish oil.  $R_f = 0.59$  (EtOAc/heptane 1:9). <sup>1</sup>H NMR (500 MHz, CDCl<sub>3</sub>)  $\delta = 7.44-7.42$  (m, 2H), 7.39-7.37 (m, 3H), 7.33-7.27 (m, 5H), 6.79 (br d,  $J = 9.3$  Hz, 1H), 6.23 (br d,  $J = 9.3$  Hz, 1H), 5.64 (dd,  $J = 9.3, 5.8$  Hz, 1H), 5.53 (dd,  $J = 9.3, 5.8$  Hz, 1H), 2.98 (dddd,  $J = 5.8, 5.8, 1.3, 1.3$  Hz, 1H), 1.11-1.10 (m, 21H) ppm. <sup>13</sup>C NMR (125 MHz, CDCl<sub>3</sub>)  $\delta = 147.9, 136.6, 133.2, 132.4, 131.0, 129.4, 129.1, 129.1, 129.0, 125.6, 121.7, 119.9, 112.8, 112.3, 107.7, 82.1, 47.0, 33.3, 18.8, 11.3$  ppm, 4Cs masked. HRMS (MALDI +ve) calcd for C<sub>35</sub>H<sub>36</sub>N<sub>2</sub>Si [M<sup>+</sup>]:  $m/z = 511.2564$ ; found  $m/z = 511.2569$ .

*2,3-Diphenyl-7-[(triisopropylsilyl)ethynyl]-1,4-dihydroazulene-1,1-dicarbonitrile (18d)*: A yellowish oil.  $R_f = 0.40$  (chlorobenzene/heptane 7:3). <sup>1</sup>H NMR (500 MHz, CDCl<sub>3</sub>)  $\delta = 7.42-7.37$  (m, 5H), 7.35-7.31 (m, 3H), 7.26-7.24 (m, 2H), 6.52 (d,  $J = 6.6$  Hz, 1H), 6.30 (ddd,  $J = 9.6, 6.6, 1.1$  Hz, 1H), 6.21 (d,  $J = 5.4$  Hz, 1H), 5.50 (dd,  $J = 9.6, 5.4$  Hz, 1H), 3.35 (ddd,  $J = 5.4, 1.1$  Hz, 1H), 1.11-1.10 (m, 21H) ppm. <sup>13</sup>C NMR (125 MHz, CDCl<sub>3</sub>)  $\delta = 148.2, 143.0, 135.5, 132.3, 132.1, 131.4, 129.7, 129.4, 129.4, 129.1, 129.0, 128.9, 127.0, 126.3, 125.3, 124.8, 113.8, 113.8, 107.1, 82.5, 44.7, 32.4, 18.8, 11.4$  ppm. HRMS (MALDI +ve) calcd for C<sub>35</sub>H<sub>36</sub>N<sub>2</sub>Si [M<sup>+</sup>]:  $m/z = 511.2564$ ; found  $m/z = 511.2576$ .

*2,3-Diphenyl-8-[(triisopropylsilyl)ethynyl]-1,4-dihydroazulene-1,1-dicarbonitrile (18e)*: A yellowish oil.  $R_f = 0.59$  (chlorobenzene/CS<sub>2</sub> 1:1). <sup>1</sup>H NMR (500 MHz, CDCl<sub>3</sub>)  $\delta = 7.39-7.35$  (m, 5H), 7.29-7.27 (m, 3H), 7.22-7.20 (m, 2H), 6.72 (dd,  $J = 10.5, 6.5$  Hz, 1H), 6.46 (d,  $J = 10.5$  Hz, 1H), 6.24 (br dd,  $J = 8.8, 6.5$  Hz, 1H), 5.27 (dd,  $J = 8.8, 6.4$  Hz, 1H), 3.67 (dd,  $J = 6.4, 0.7$  Hz, 1H), 1.13 (br s, 21H) ppm. <sup>13</sup>C NMR (125 MHz, CDCl<sub>3</sub>)  $\delta = 147.0, 142.0, 132.8, 132.7, 132.7, 131.1, 129.2, 129.1, 129.0, 129.0, 129.0, 128.9, 125.8, 123.8, 112.5, 112.1, 102.0, 87.0, 46.0, 28.0, 18.8, 11.4$  ppm, 2Cs masked. HRMS (MALDI +ve) calcd for C<sub>35</sub>H<sub>36</sub>N<sub>2</sub>Si [M<sup>+</sup>]:  $m/z = 511.2564$ ; found  $m/z = 511.2569$ .

*Reaction of 7 with lithium triisopropylsilylacetylide:* To a degassed solution of triisopropylsilylacetylene (1.5 mL, 6.7 mmol) in Et<sub>2</sub>O (25 mL) at -40 °C was added LiHMDS (3.5 mL, 1M in toluene, 3.5 mmol). The reaction contents were allowed to warm to -20 °C, then cooled to -78 °C and added via cannula to a vessel containing a degassed suspension of **7** (1.33 g, 2.69 mmol) in THF (50 mL) at -78 °C. The reaction mixture was stirred for 30 min at -78 °C, quenched with saturated aqueous NH<sub>4</sub>Cl (20 mL) and water (80 mL) and allowed to warm to ambient temperature. The reaction mixture was diluted with Et<sub>2</sub>O (100 mL) and the phases separated. The aqueous component was extracted with Et<sub>2</sub>O (100 mL). The combined organic phases were dried over MgSO<sub>4</sub> and filtered. The solvent was removed under reduced pressure and the crude residue was purified by flash column chromatography (toluene/heptane 1:1) to give a regioisomeric mixture of **19** (391 mg, 25%) as a brilliant yellow oil. Anal. calcd (%) for C<sub>40</sub>H<sub>41</sub>N<sub>2</sub>Si (588.87): C 83.63, H 6.85, N 4.76; found C 83.44, H 6.74, N 4.47. Further purification by flash column chromatography (acetone/heptane 3:47) allowed for the isolation of **19a**, whereas **19c** and **20**, which were isolated as a mixture (R<sub>f</sub> = 0.37), could each be obtained pure by flash column chromatography (chlorobenzene/cyclohexane 6:4).

*2,3,7-Triphenyl-4-((triisopropylsilyl)ethynyl)azulene-1,1(4H)-dicyanitrile (19a):* R<sub>f</sub> = 0.34 (acetone/heptane 3:47). <sup>1</sup>H NMR (500 MHz, CDCl<sub>3</sub>) δ = 7.58-7.56 (m, 2H), 7.49-7.36 (m, 8H), 7.31-7.27 (m, 6H), 6.63 (d, *J* = 10.0 Hz, 1H), 5.79 (ddd, *J* = 10.0, 8.8, 0.8 Hz, 1H), 4.22 (d, *J* = 8.8 Hz, 1H) ppm. <sup>13</sup>C NMR (125 MHz, CDCl<sub>3</sub>) δ = 147.8, 146.1, 141.5, 140.8, 136.2, 134.2, 132.6, 131.1, 130.4, 129.6, 129.3, 129.2, 129.0, 128.8, 128.7, 128.6, 128.5, 127.1, 123.7, 119.0, 112.7, 112.1, 102.8, 82.8, 45.7, 28.3, 18.6 (2 signals, rotamers), 11.2 ppm. HRMS (ESP +ve) calcd for C<sub>41</sub>H<sub>40</sub>N<sub>2</sub>Si [(M-H)<sup>+</sup>]: *m/z* = 587.2877; found *m/z* = 587.2866.

*2,3,7-triphenyl-6-((triisopropylsilyl)ethynyl)azulene-1,1(6H)-dicyanitrile (19c):* R<sub>f</sub> = 0.43 (chlorobenzene/cyclohexane 6:4). <sup>1</sup>H NMR (500 MHz, CDCl<sub>3</sub>) δ = 7.60-7.58 (m, 2H), 7.45-7.30 (m, 13H), 7.01 (s, 1H), 6.35 (d, *J* = 9.5 Hz, 1H), 5.79 (dd, *J* = 9.5, 7.7 Hz, 1H), 4.40 (br d, *J* = 7.7 Hz, 1H), 0.99-0.98 (m, 21H). <sup>13</sup>C NMR (125 MHz, CDCl<sub>3</sub>) δ = 148.1, 146.4, 139.7, 136.9, 136.2, 132.8, 132.6, 131.3, 129.4, 129.3, 129.2, 129.1, 129.0, 129.0, 128.7, 128.6, 124.3, 123.1, 118.5, 113.3, 112.2, 104.8, 83.3, 47.4, 35.7, 18.8 (2 signals, rotamers), 11.2 ppm; 1C masked. HRMS (ESP +ve) calcd for C<sub>41</sub>H<sub>40</sub>N<sub>2</sub>Si [(M-H)<sup>+</sup>]: *m/z* = 587.2877; found *m/z* = 587.2874.

*2,5,6-Triphenyl-1-((triisopropylsilyl)ethynyl)-1a,6b-dihydrocyclopropa[e]indene-4,4(1H)-dicyanitrile (20):* R<sub>f</sub> = 0.41 (chlorobenzene/cyclohexane 6:4). <sup>1</sup>H NMR (500 MHz, CDCl<sub>3</sub>) δ = 7.57-7.55 (m, 2H), 7.45-7.30 (m, 13H), 7.24 (s, 1H), 4.47 (ddd, *J* = 5.8, 4.0, 1.1 Hz, 1H), 4.24 (dd, *J* = 5.8, 4.0 Hz, 1H), 2.59 (dd, *J* = 5.8, 5.8 Hz, 1H), 1.07 (br s, 21H) ppm. <sup>13</sup>C NMR (125 MHz, C<sub>6</sub>D<sub>6</sub>) δ = 146.3, 141.7, 139.2, 138.1, 135.7, 132.2, 132.1, 131.3, 129.3, 129.3, 129.1, 129.0, 128.9, 128.9, 128.6, 127.5, 122.8, 113.4, 113.1, 106.8, 83.5 (br), 83.1, 81.3 (br), 45.7, 22.3, 18.8, 18.8 (2 signals, rotamers), 11.2 ppm, 1C masked. HRMS (ESP +ve) calcd for C<sub>41</sub>H<sub>40</sub>N<sub>2</sub>Si [(M-H)<sup>+</sup>]: *m/z* = 587.2877; found *m/z* = 587.2871.



# Compound 11

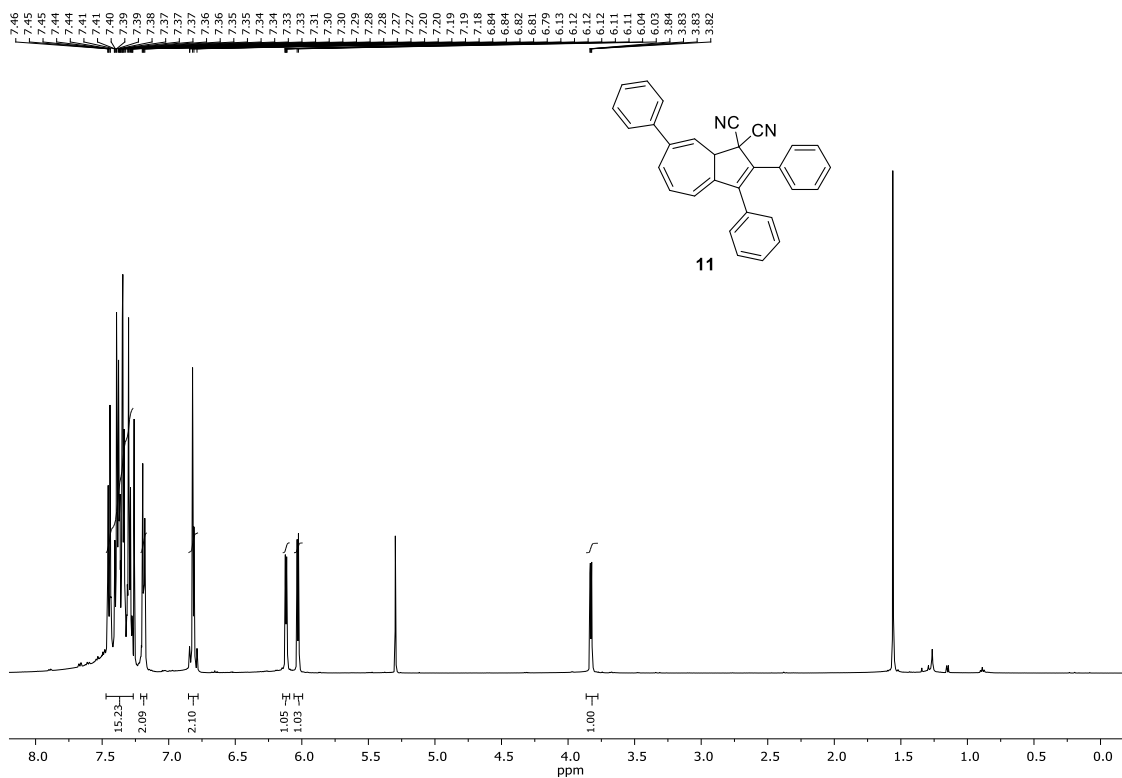

<sup>1</sup>H NMR (500 MHz) spectrum of **11** in CDCl<sub>3</sub>

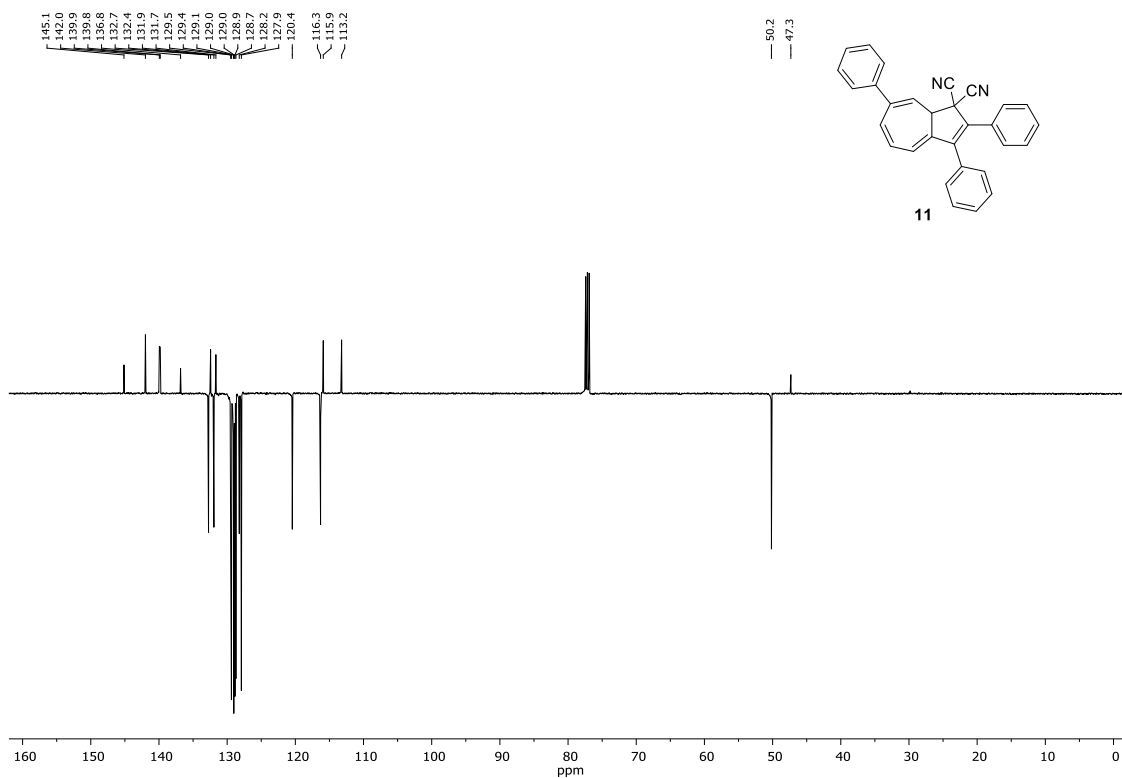

<sup>13</sup>C NMR APT (125 MHz) spectrum of **11** in CDCl<sub>3</sub>

# Compound 13

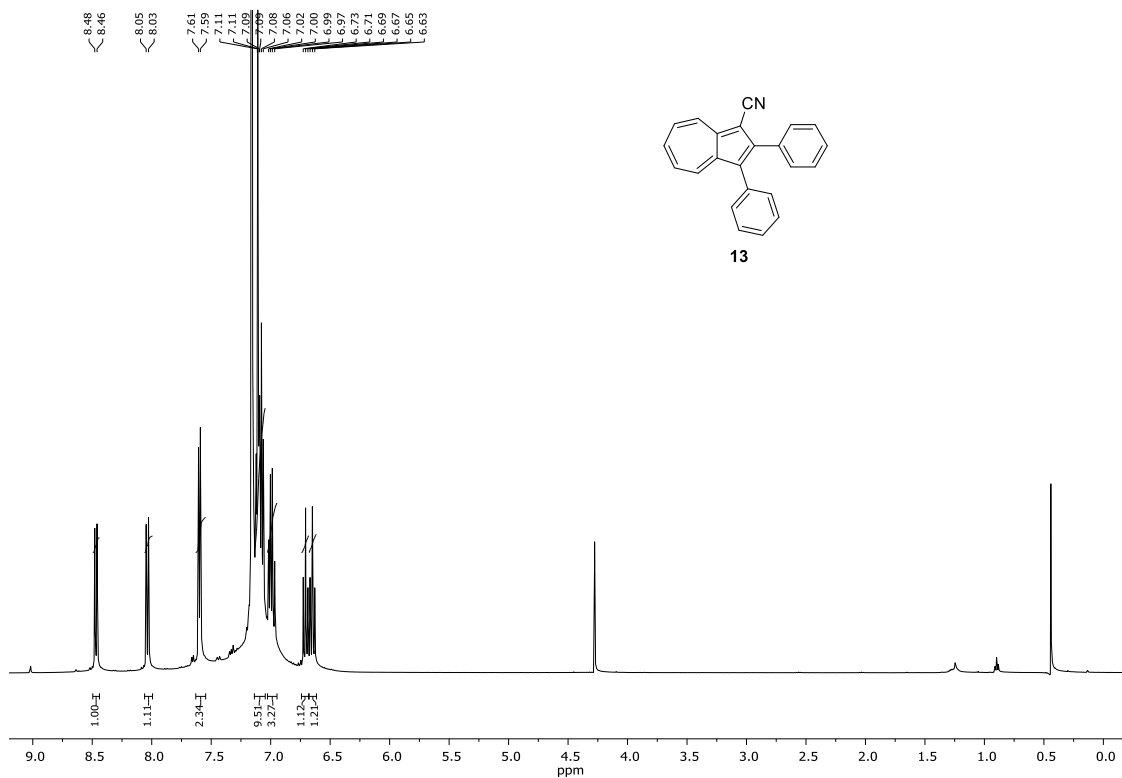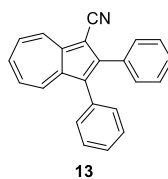

<sup>1</sup>H NMR (500 MHz) spectrum of **13** in C<sub>6</sub>D<sub>6</sub>

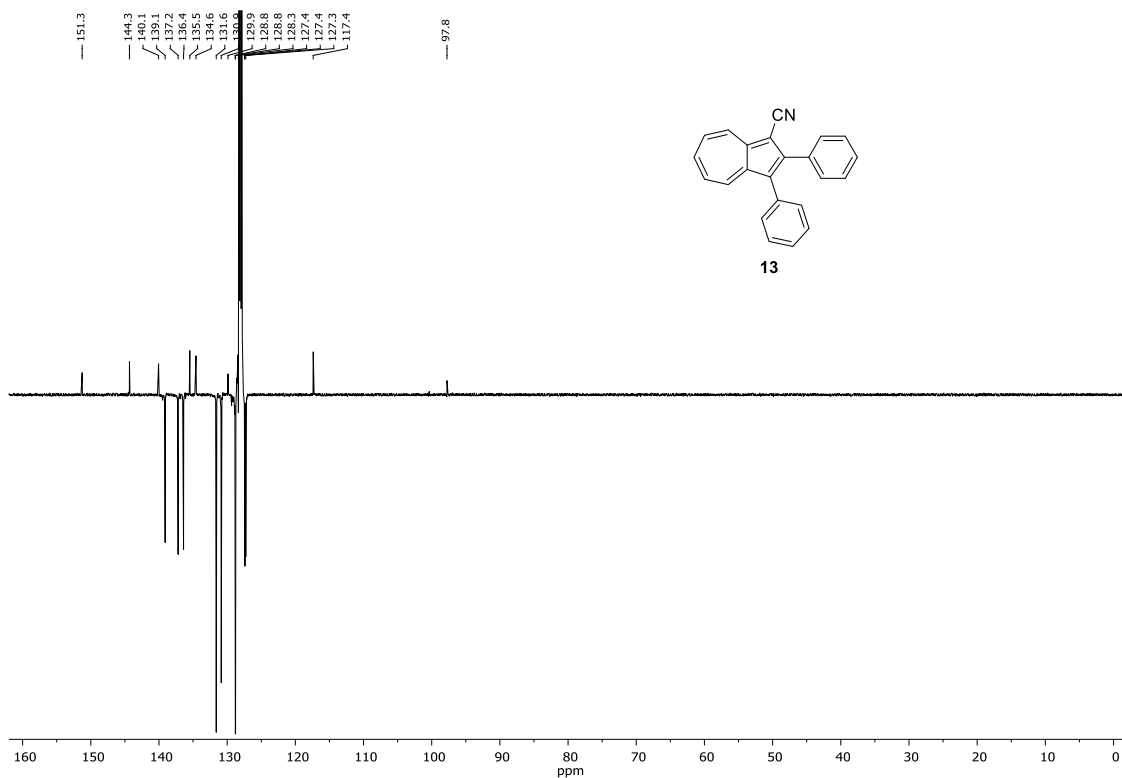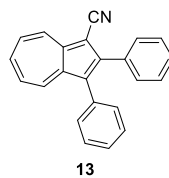

<sup>13</sup>C NMR APT (125 MHz) spectrum of **13** in C<sub>6</sub>D<sub>6</sub>

# Compound 14

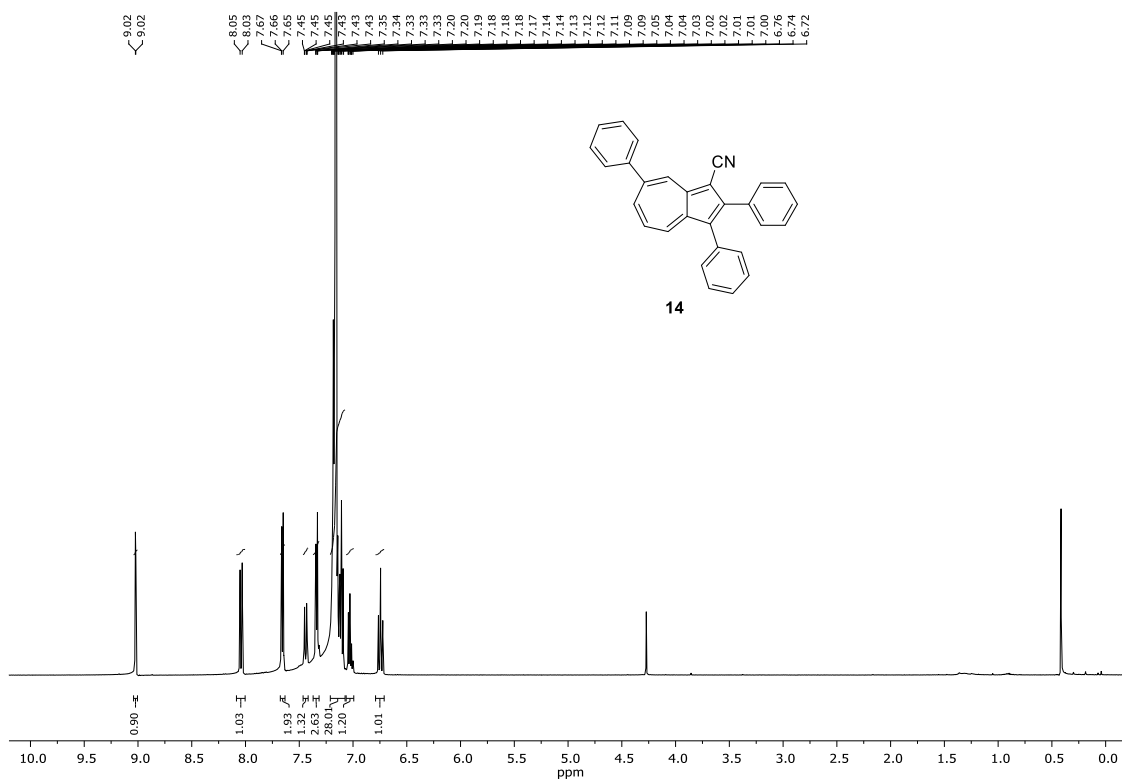

<sup>1</sup>H NMR (500 MHz) spectrum of **14** in C<sub>6</sub>D<sub>6</sub>

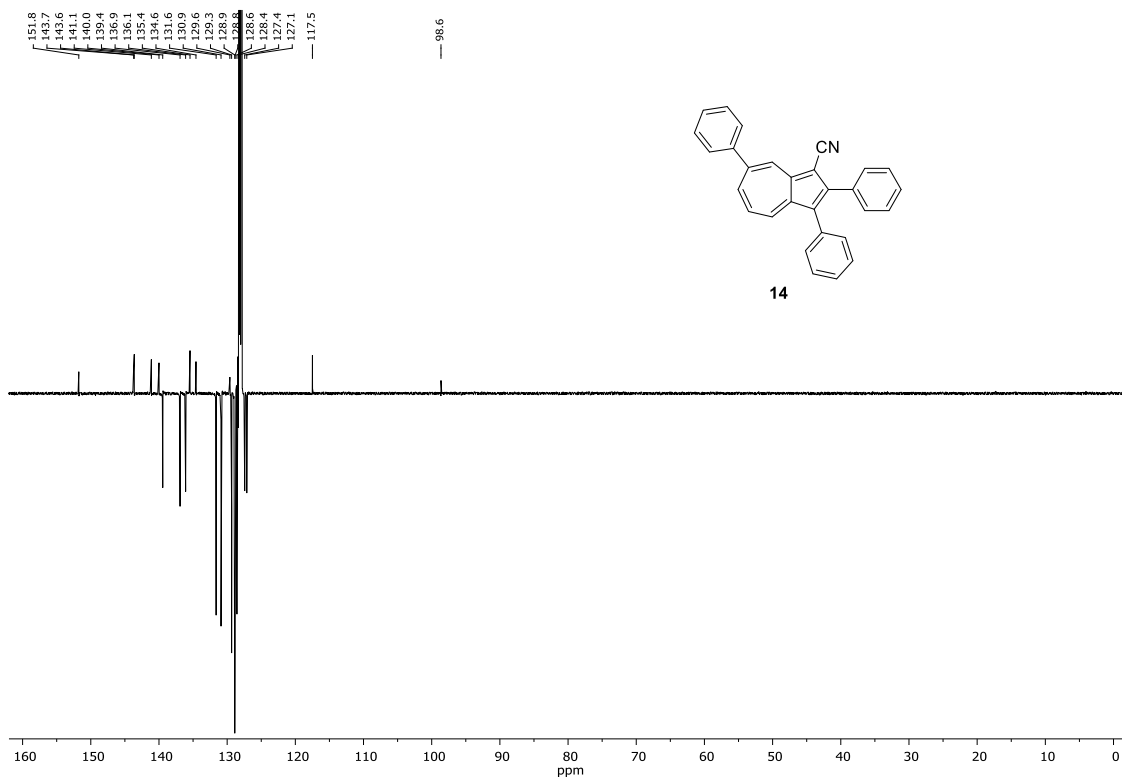

<sup>13</sup>C NMR APT (125 MHz) spectrum of **14** in C<sub>6</sub>D<sub>6</sub>

# Compound 4

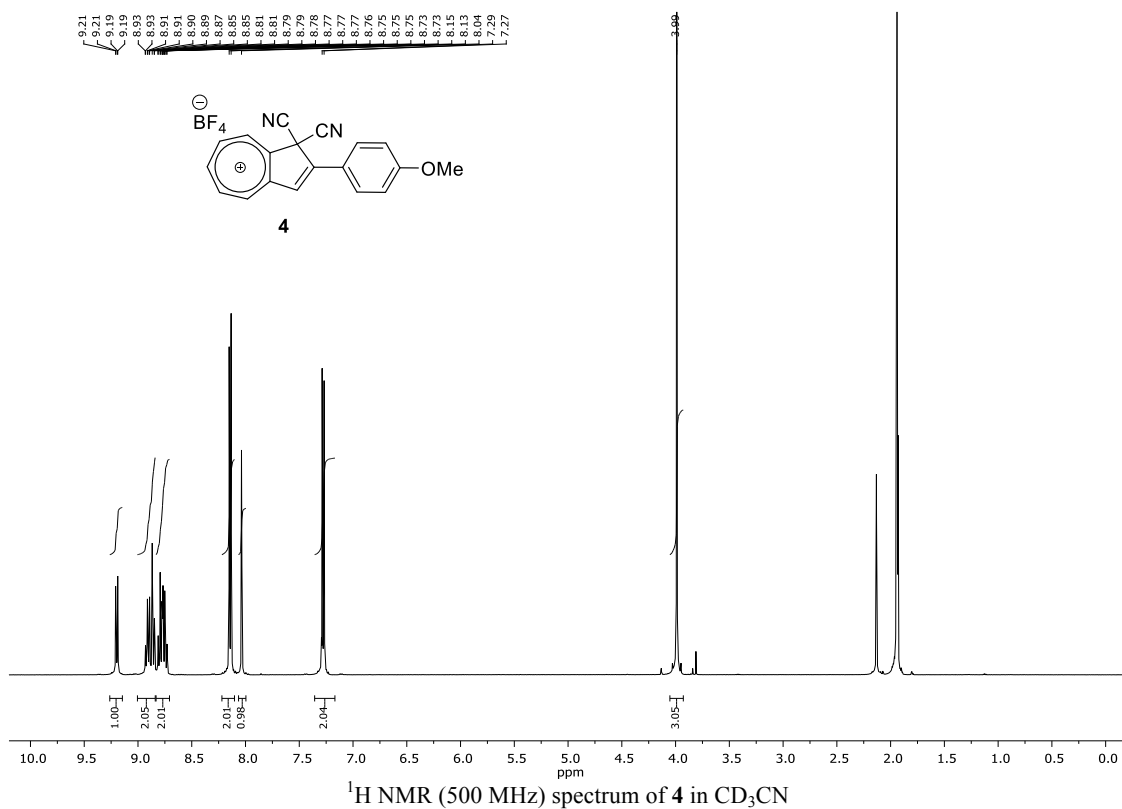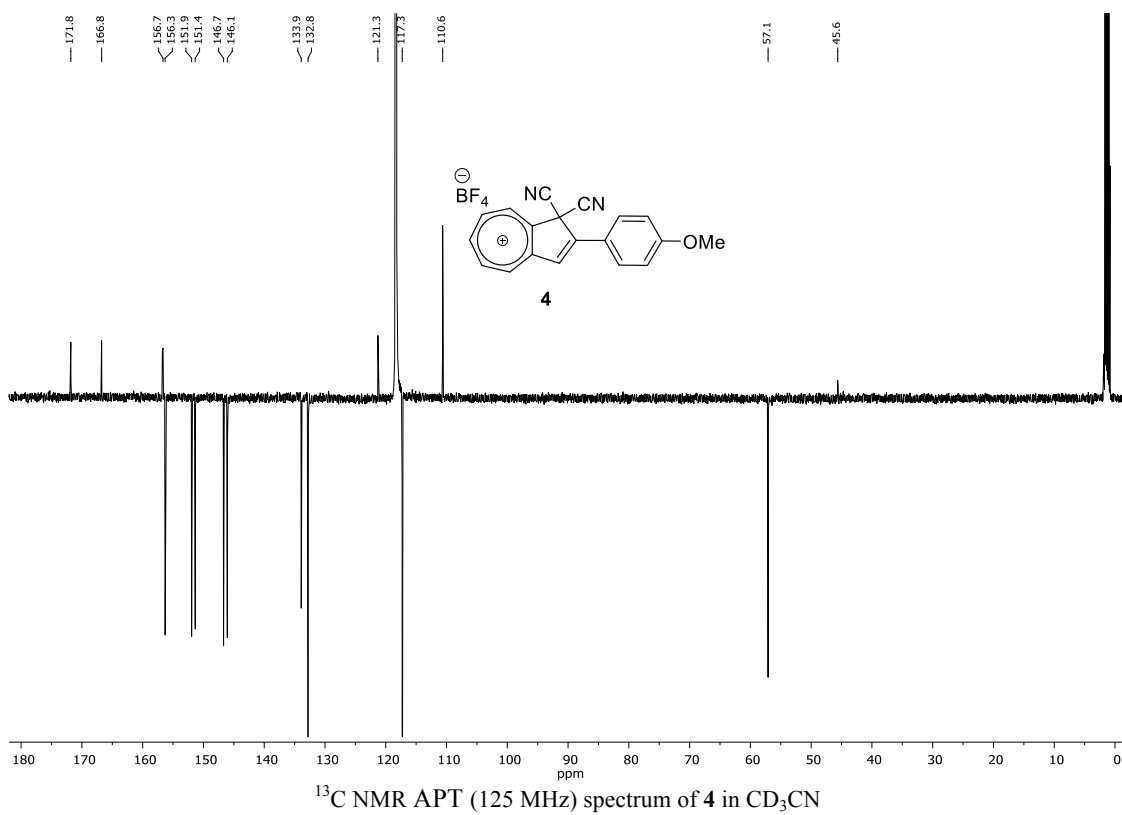

# Compound 5

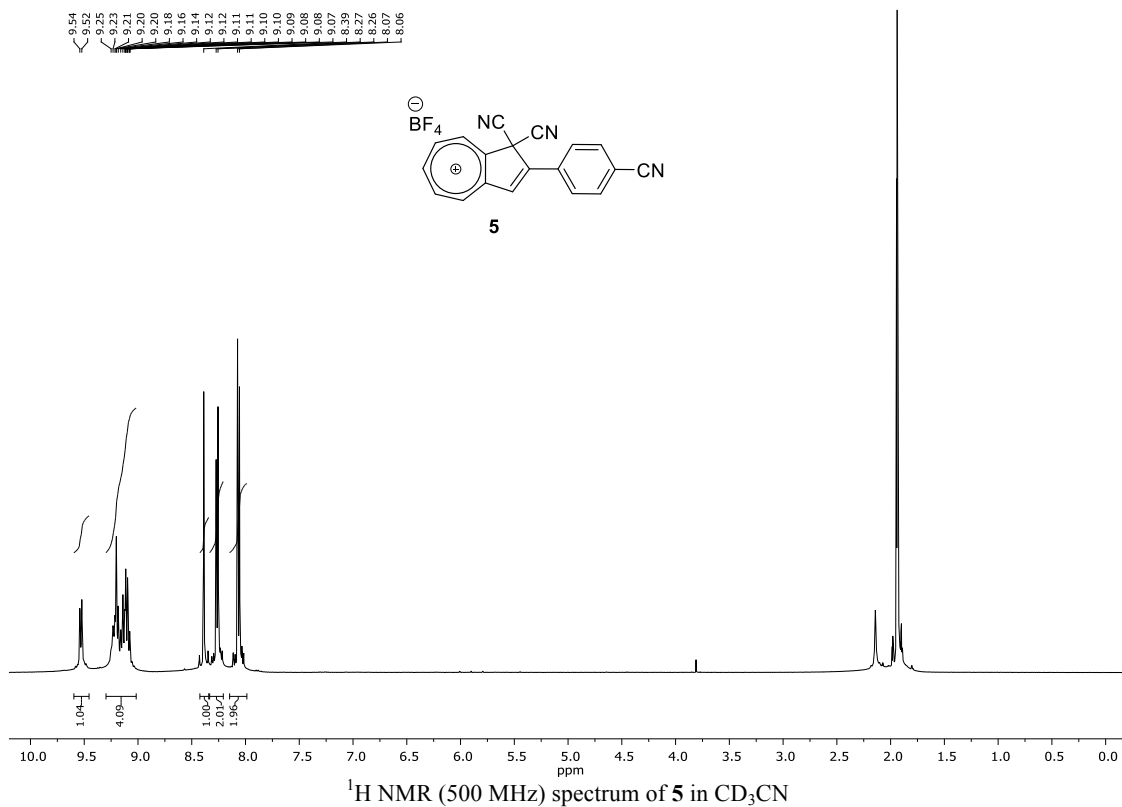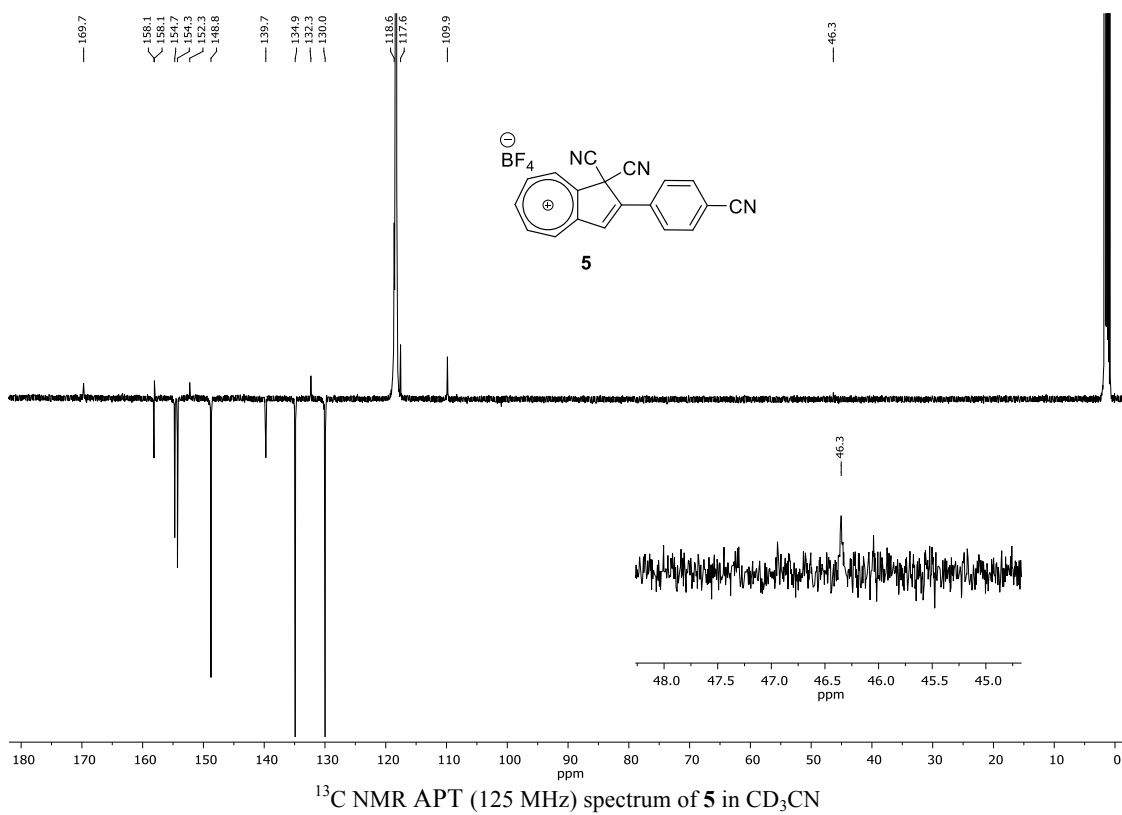



# Compound 6

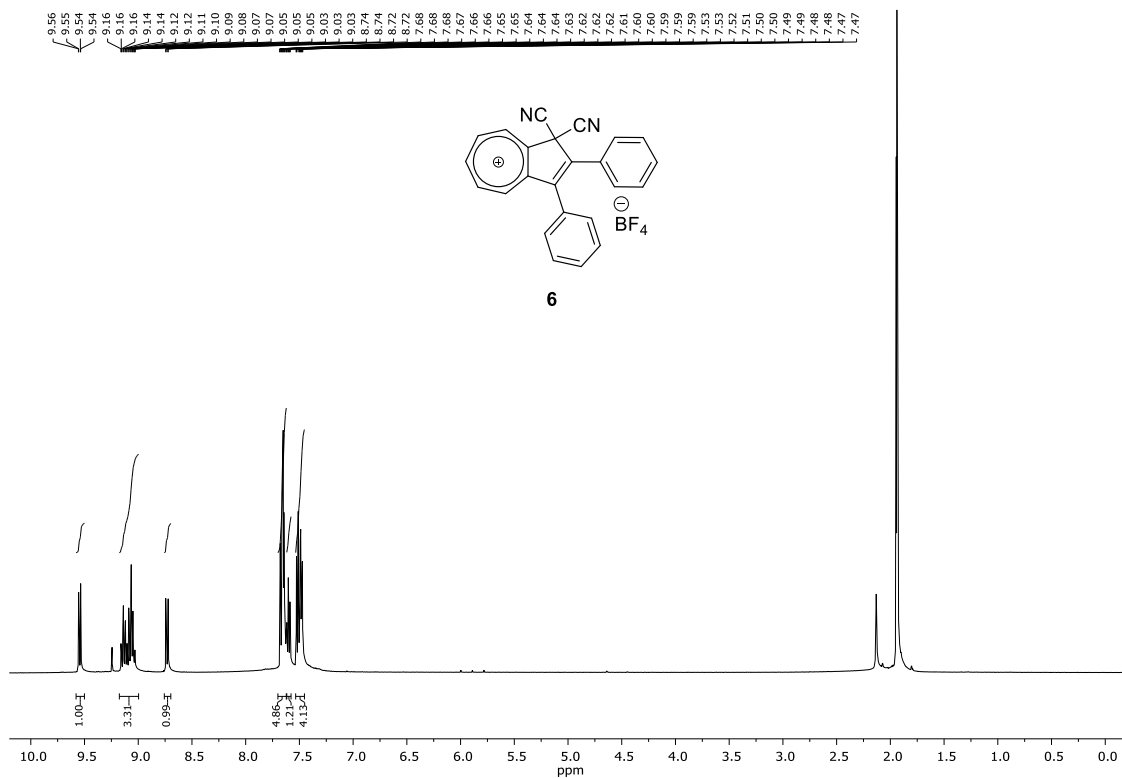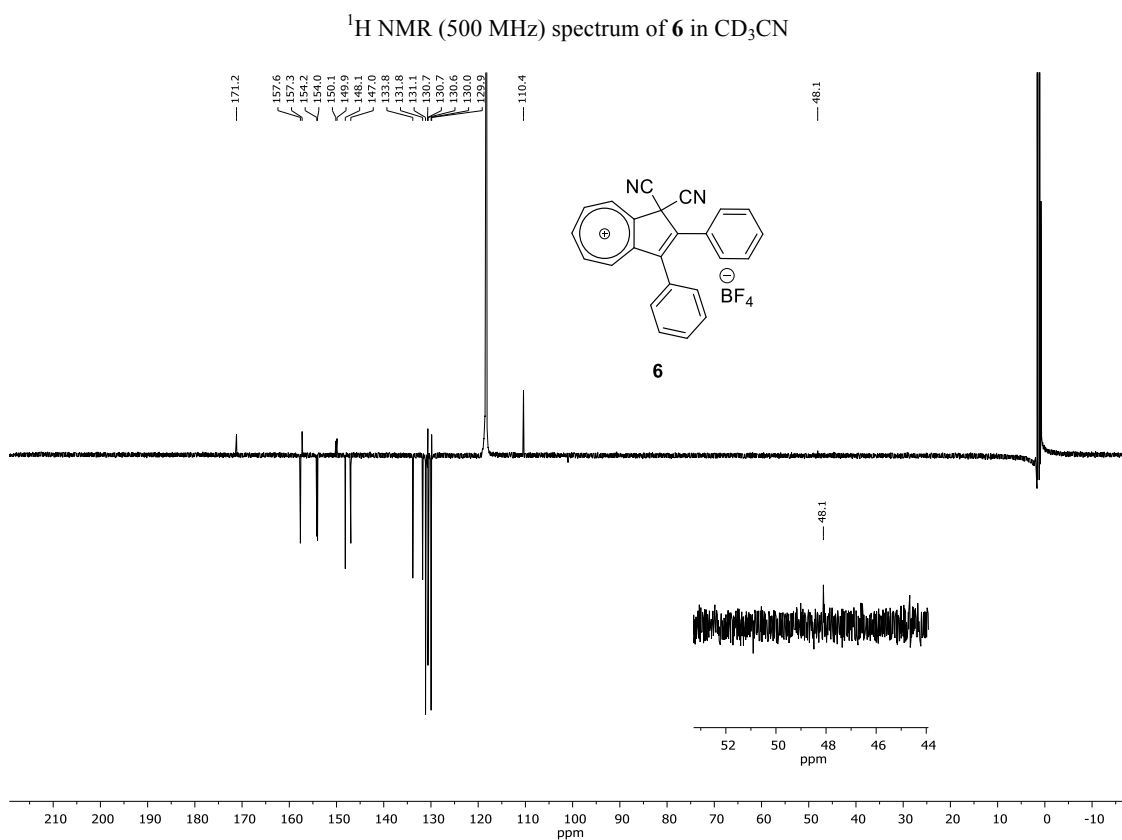

# Compound 7

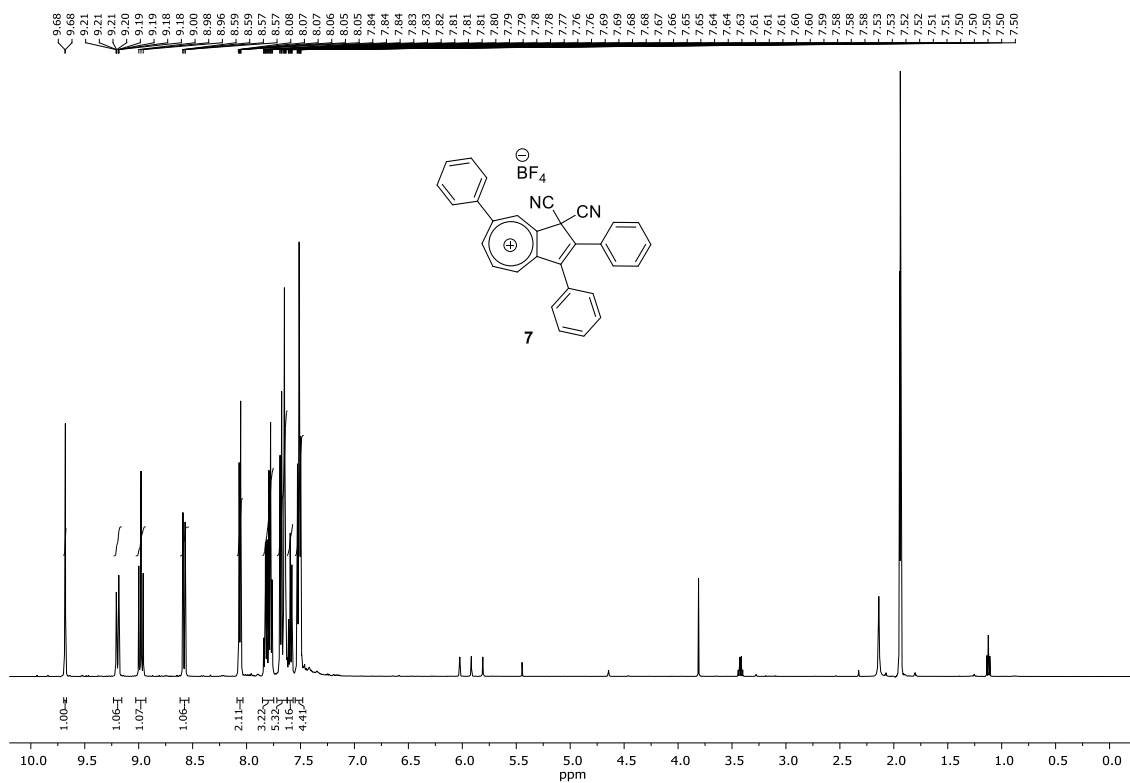

<sup>1</sup>H NMR (500 MHz) spectrum of 7 in CD<sub>3</sub>CN

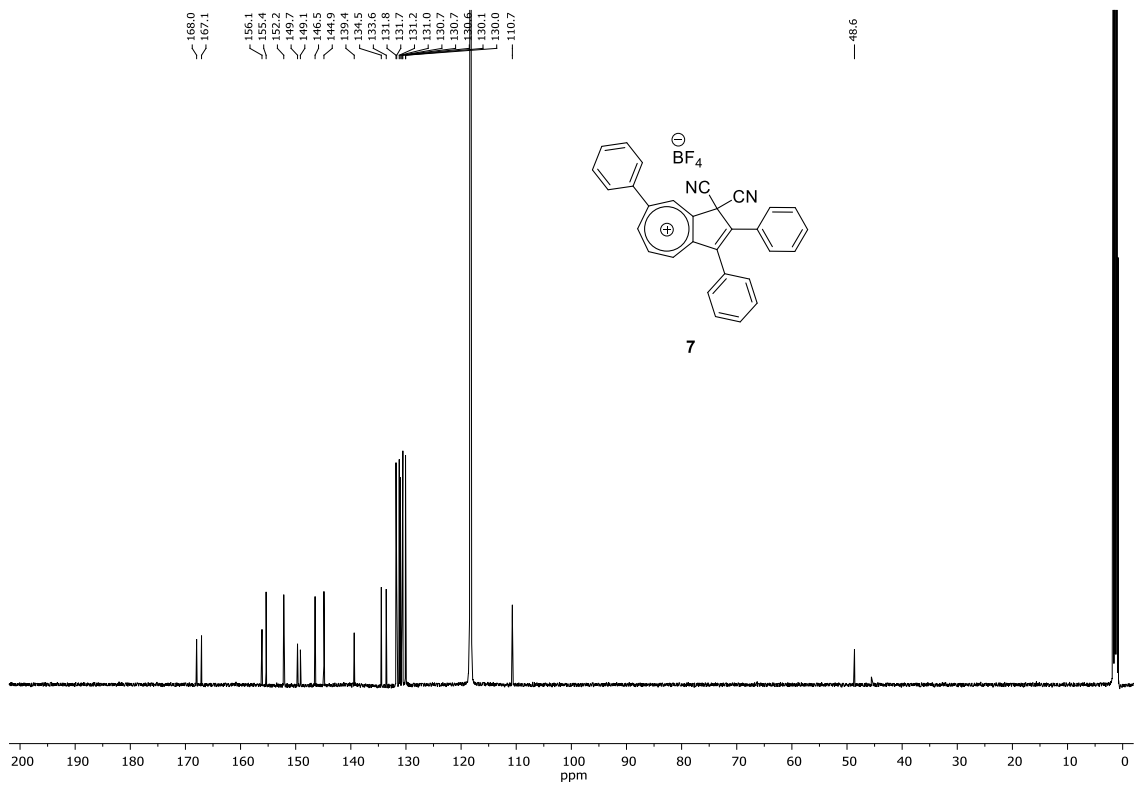

<sup>13</sup>C NMR (125 MHz) spectrum of 7 in CD<sub>3</sub>CN

### Regioisomeric mixture **15** (Table 3 Entry 1)

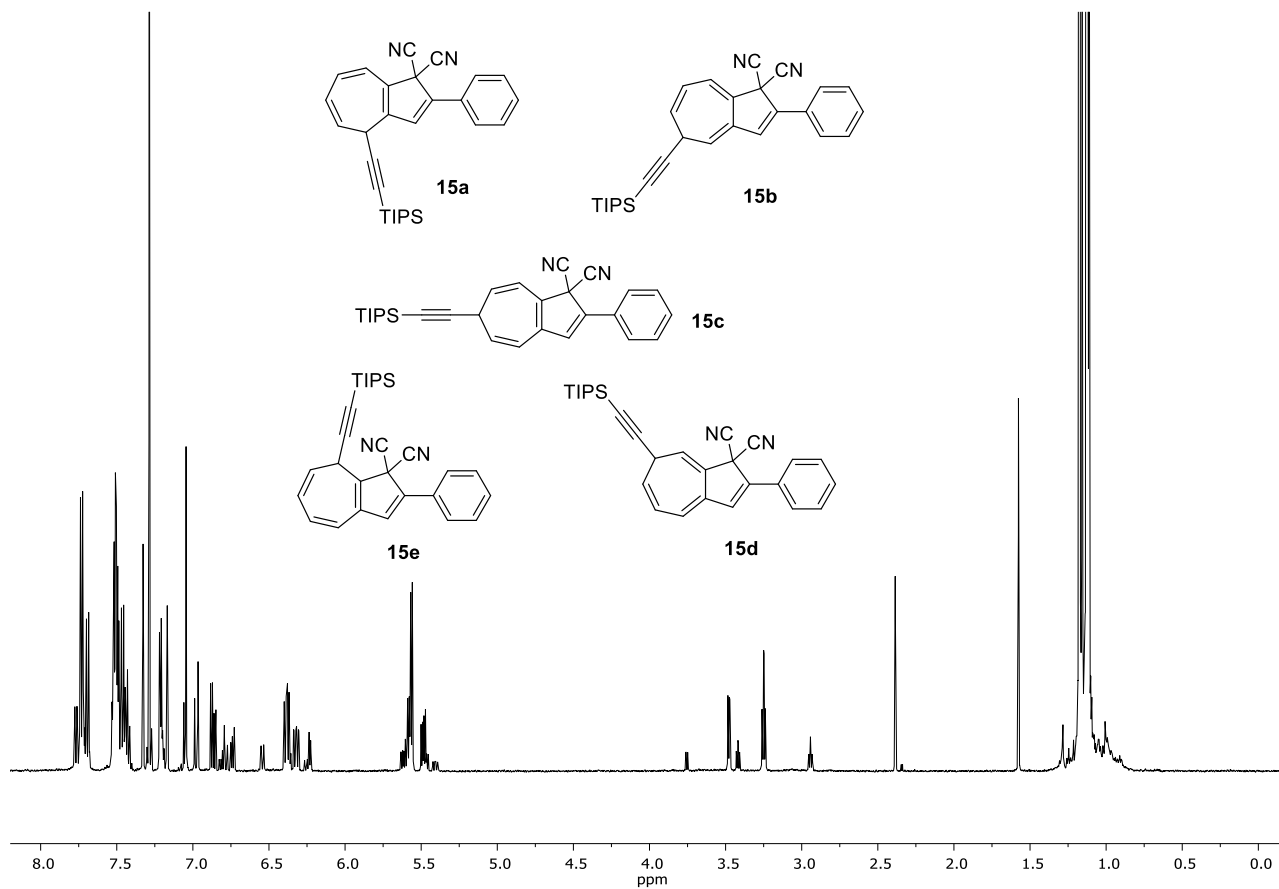

$^1\text{H}$  NMR (500 MHz) spectra of **15** in  $\text{CDCl}_3$

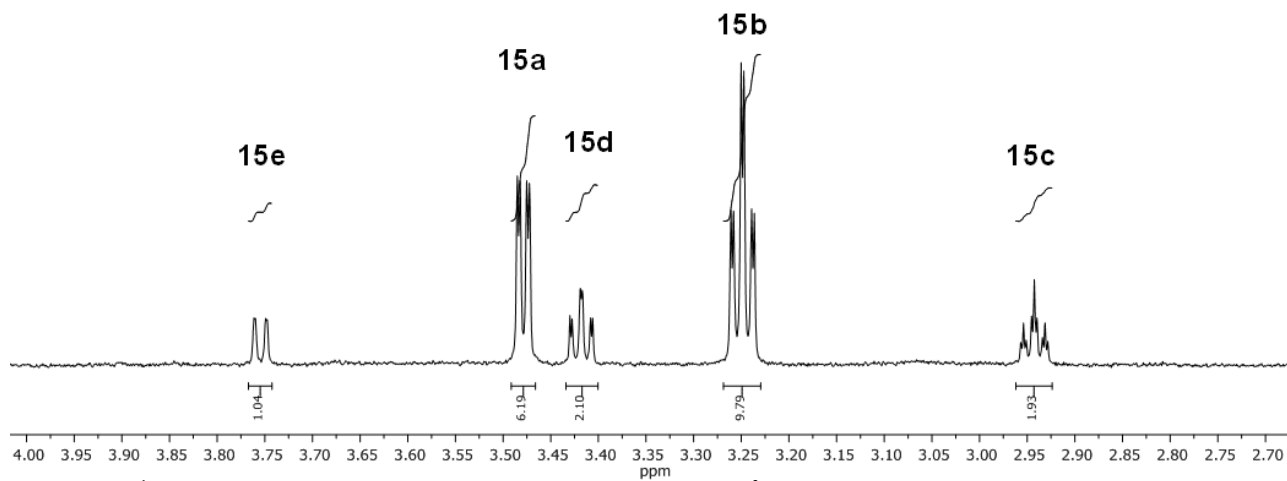

$^1\text{H}$  NMR (500 MHz) spectra of **15** in  $\text{CDCl}_3$  zoomed into the  $\text{sp}^3$  region for the point of nucleophilic attack

# Compound 15a

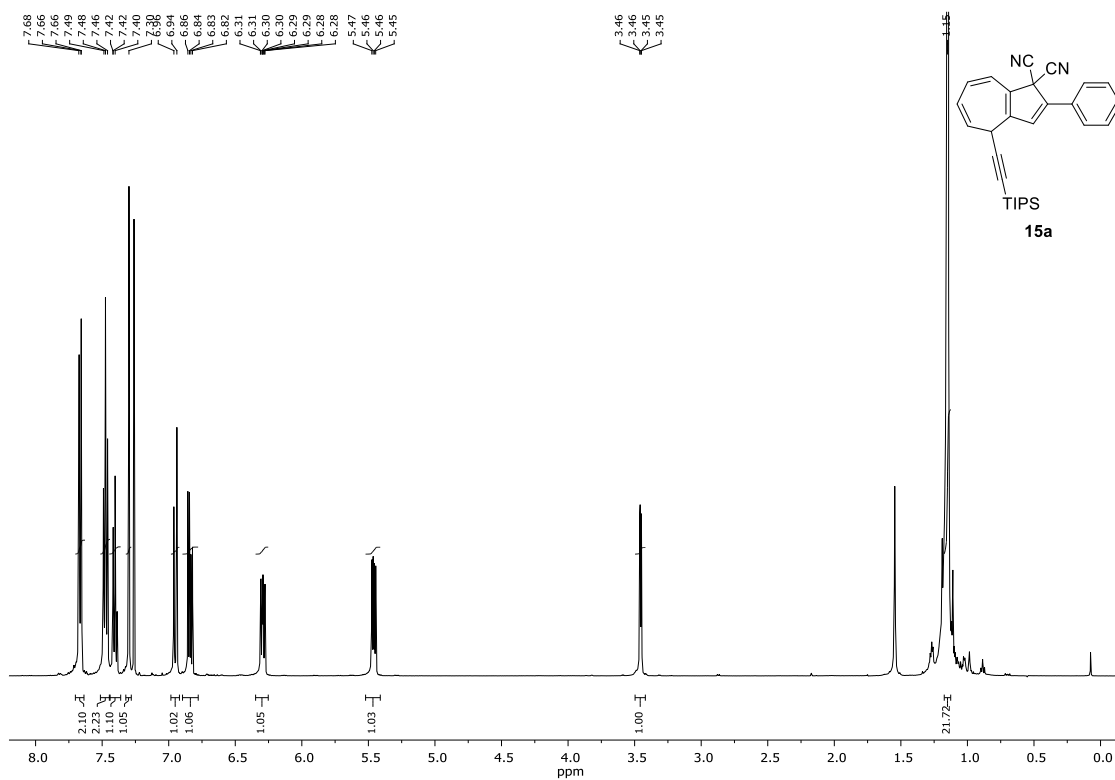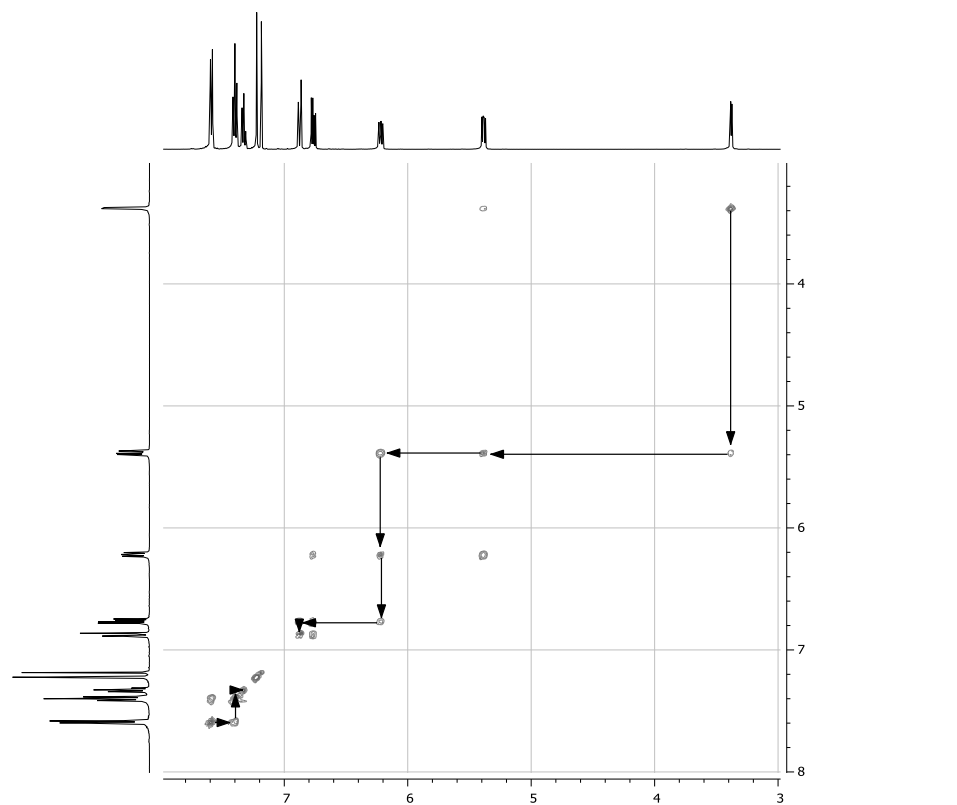

# Compound 15a

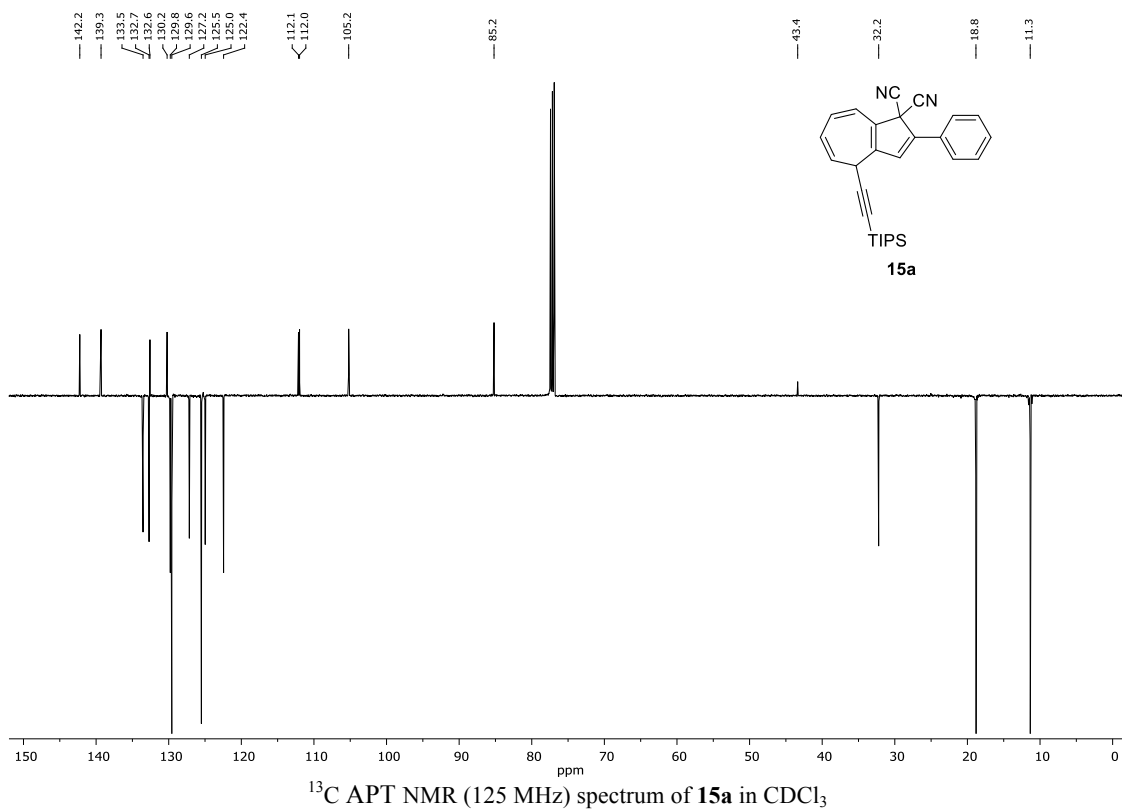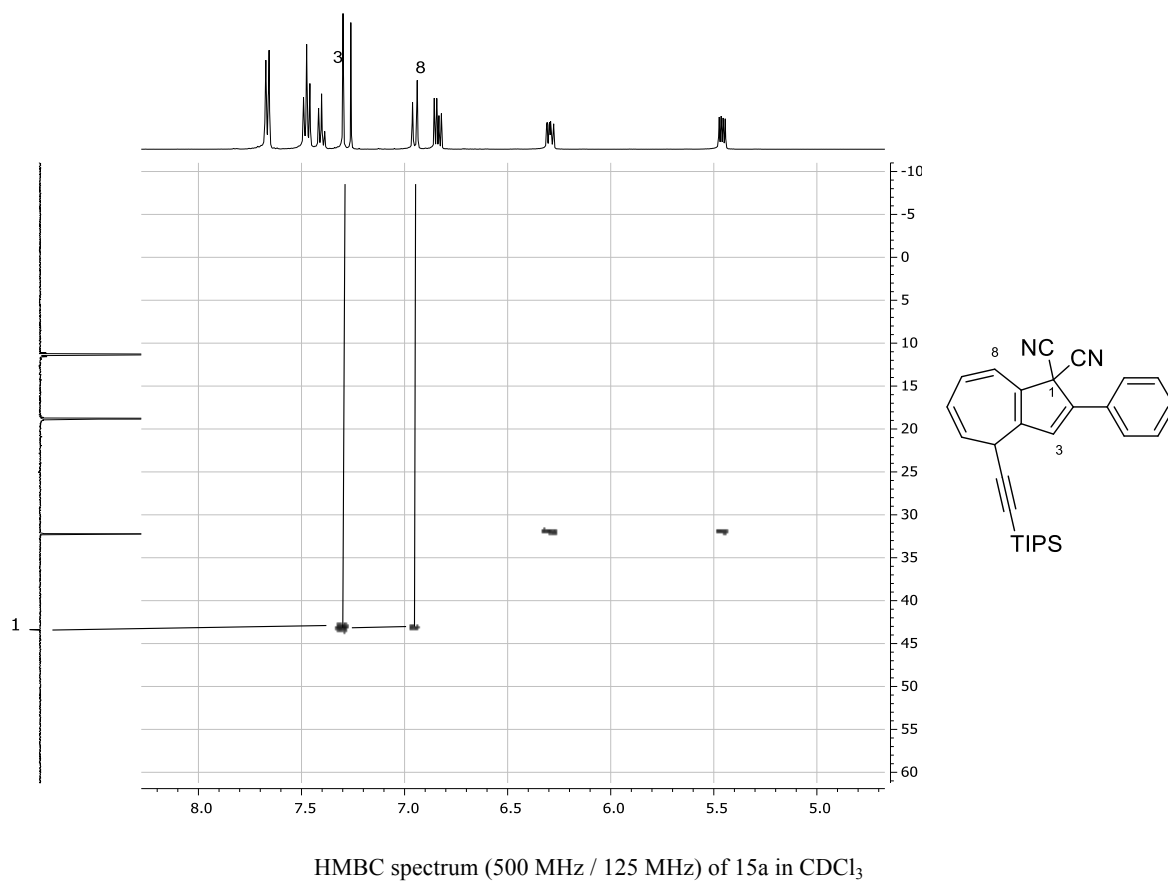

# Compound 15b

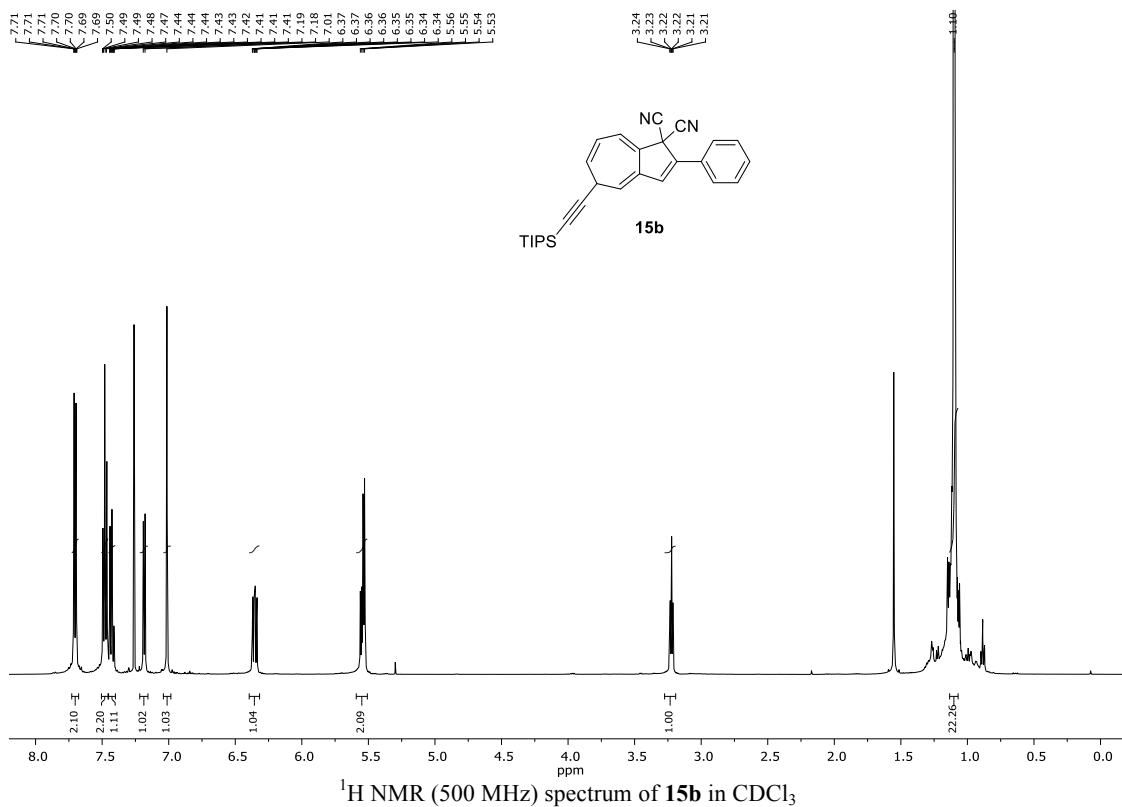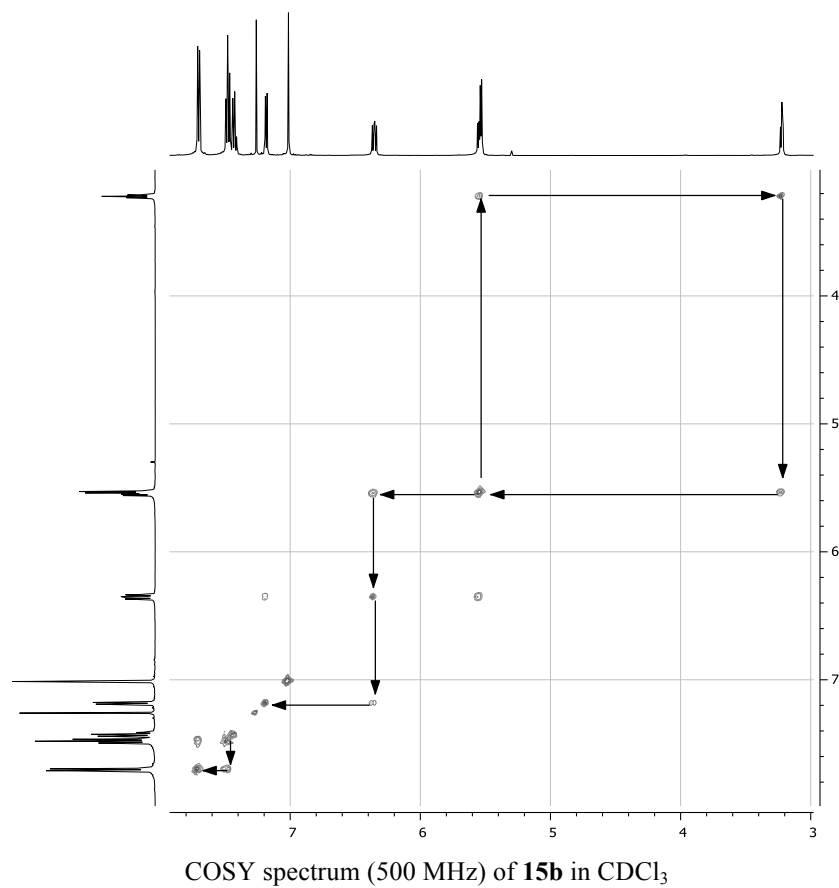

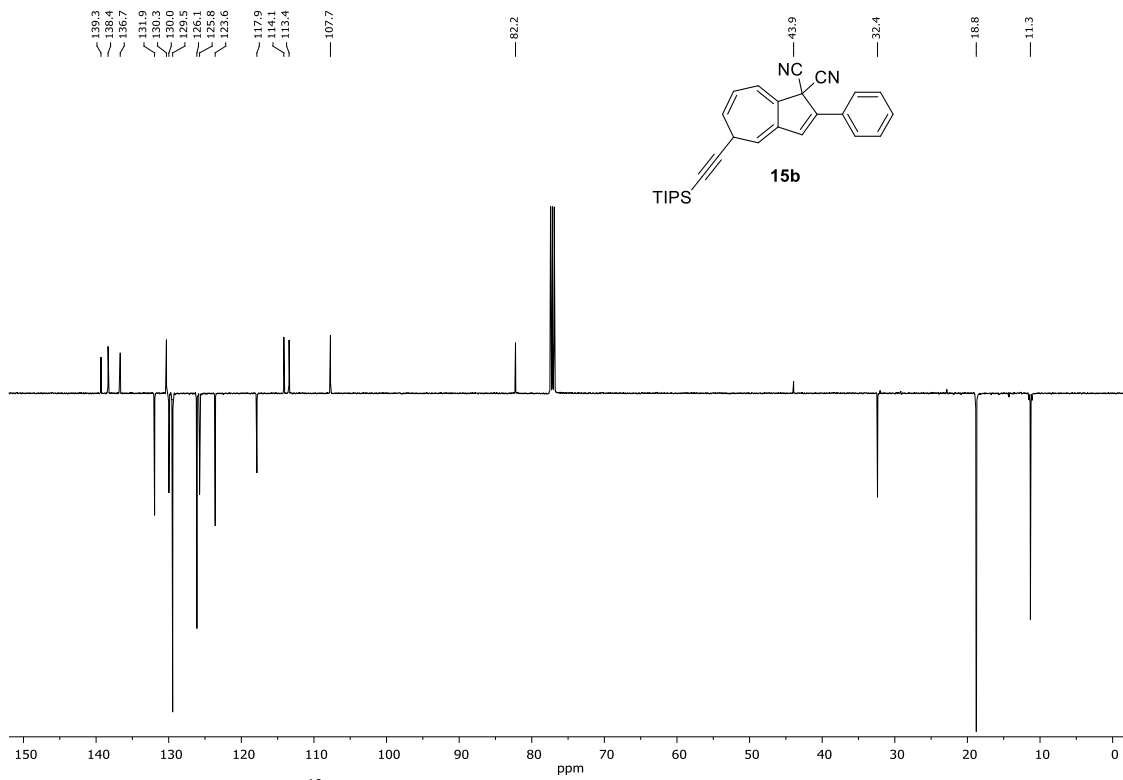

$^{13}\text{C}$  NMR APT (125 MHz) spectrum of **15b** in  $\text{CDCl}_3$

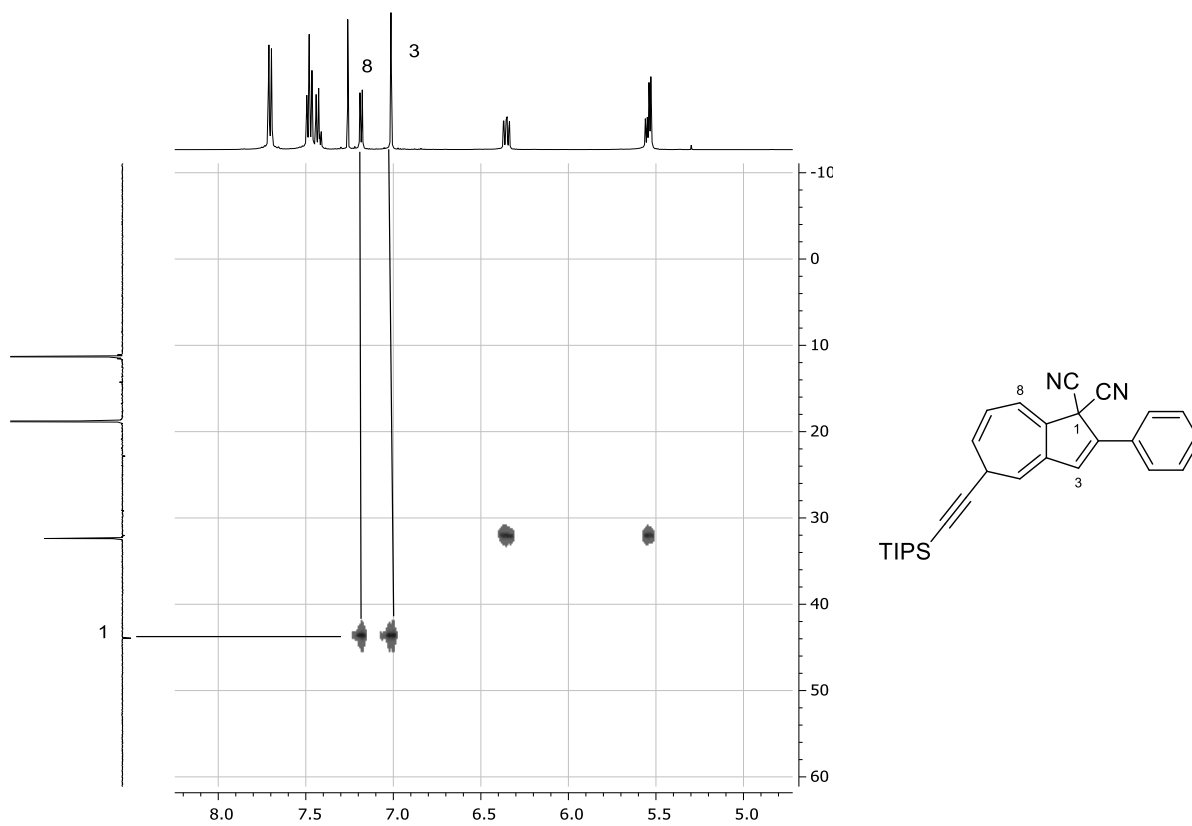

HMBC spectrum (500 MHz / 125 MHz) of **15b** in  $\text{CDCl}_3$

### Compound 15c

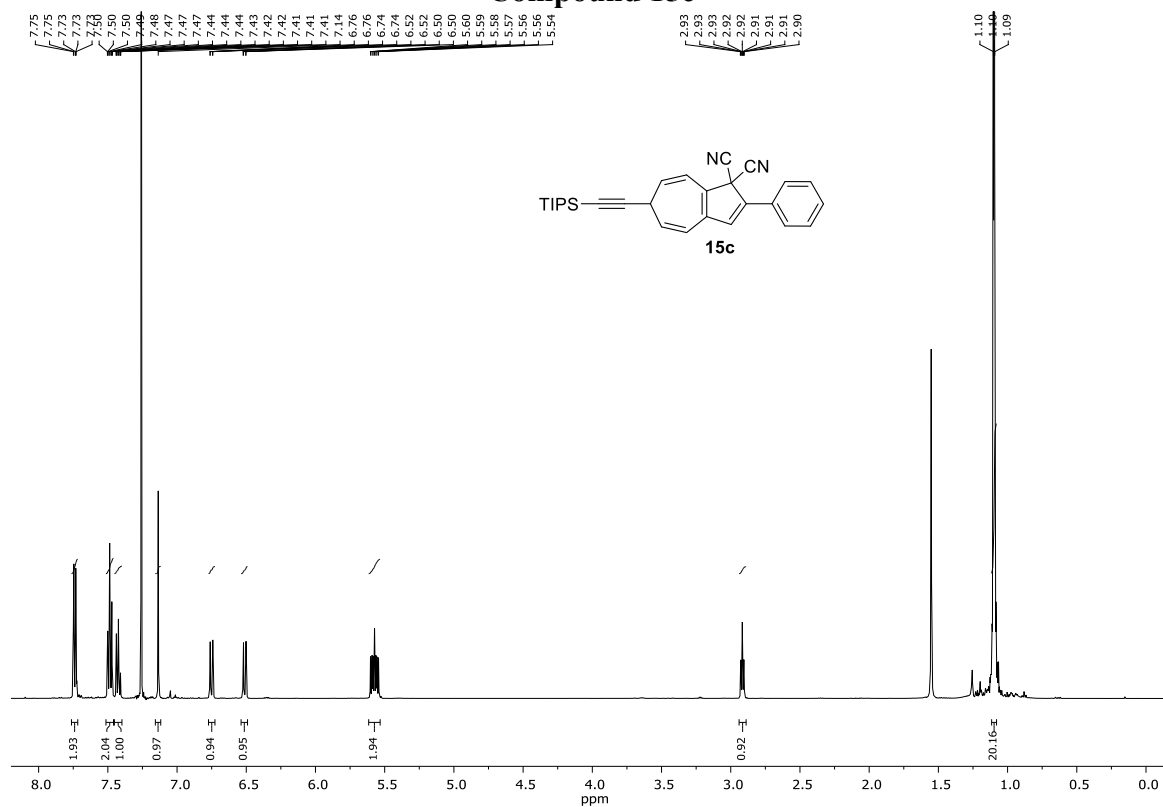

<sup>1</sup>H NMR (500 MHz) spectrum of 15c in CDCl<sub>3</sub>

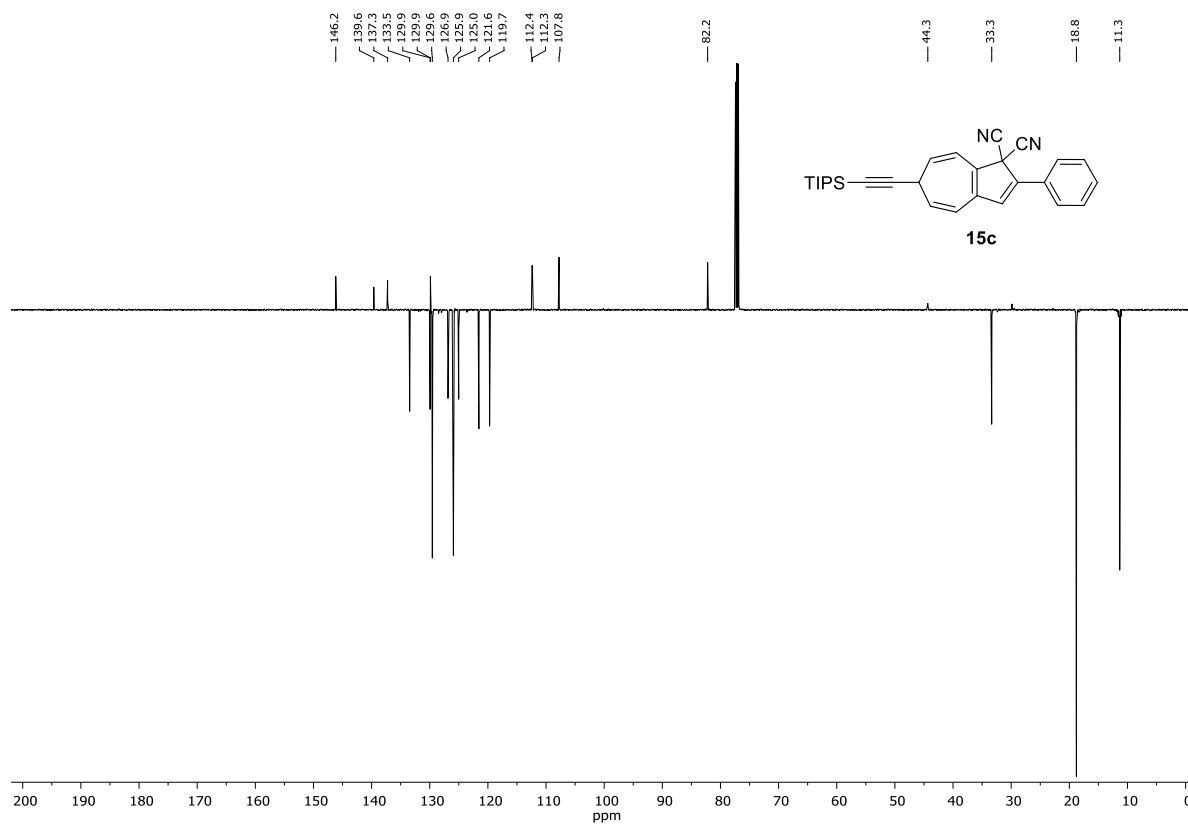

<sup>13</sup>C NMR APT (125 MHz) spectrum of 15c in CDCl<sub>3</sub>



### Compound 15d

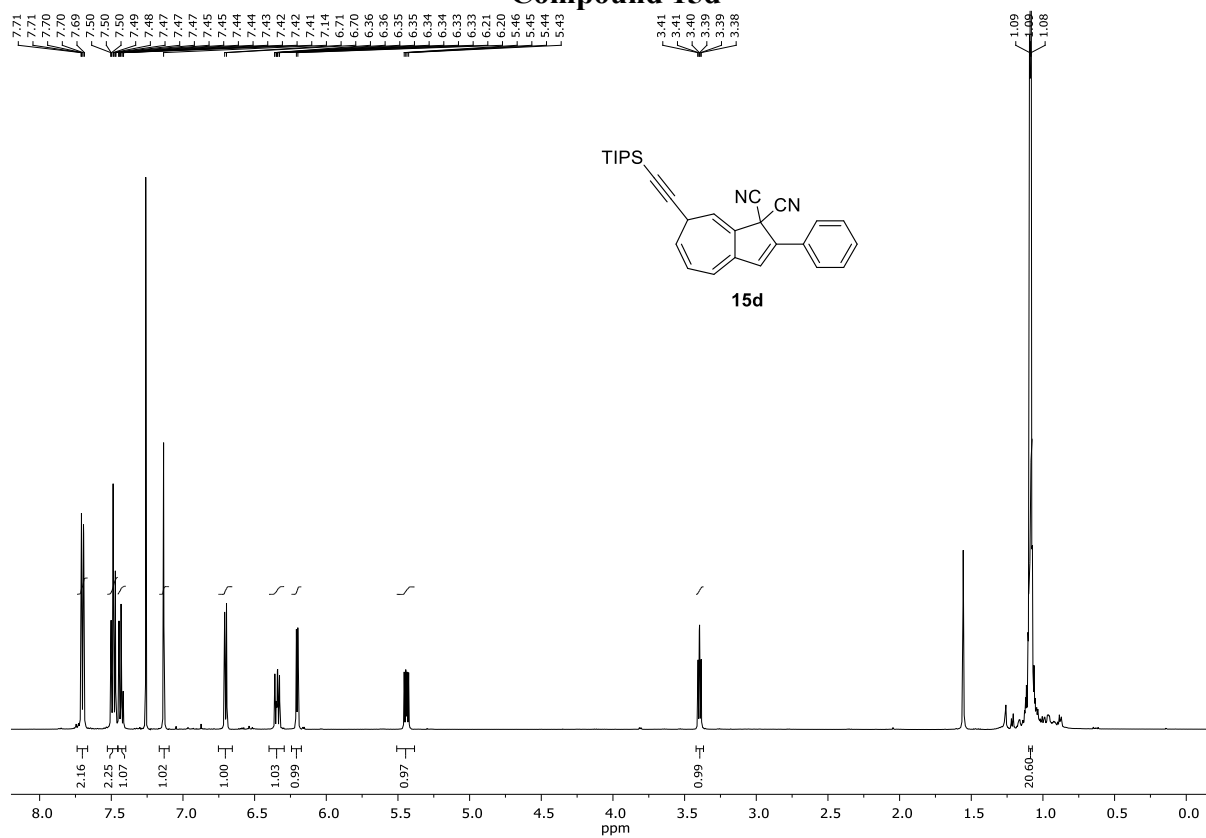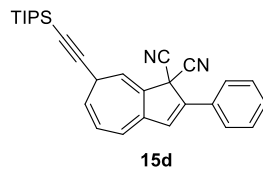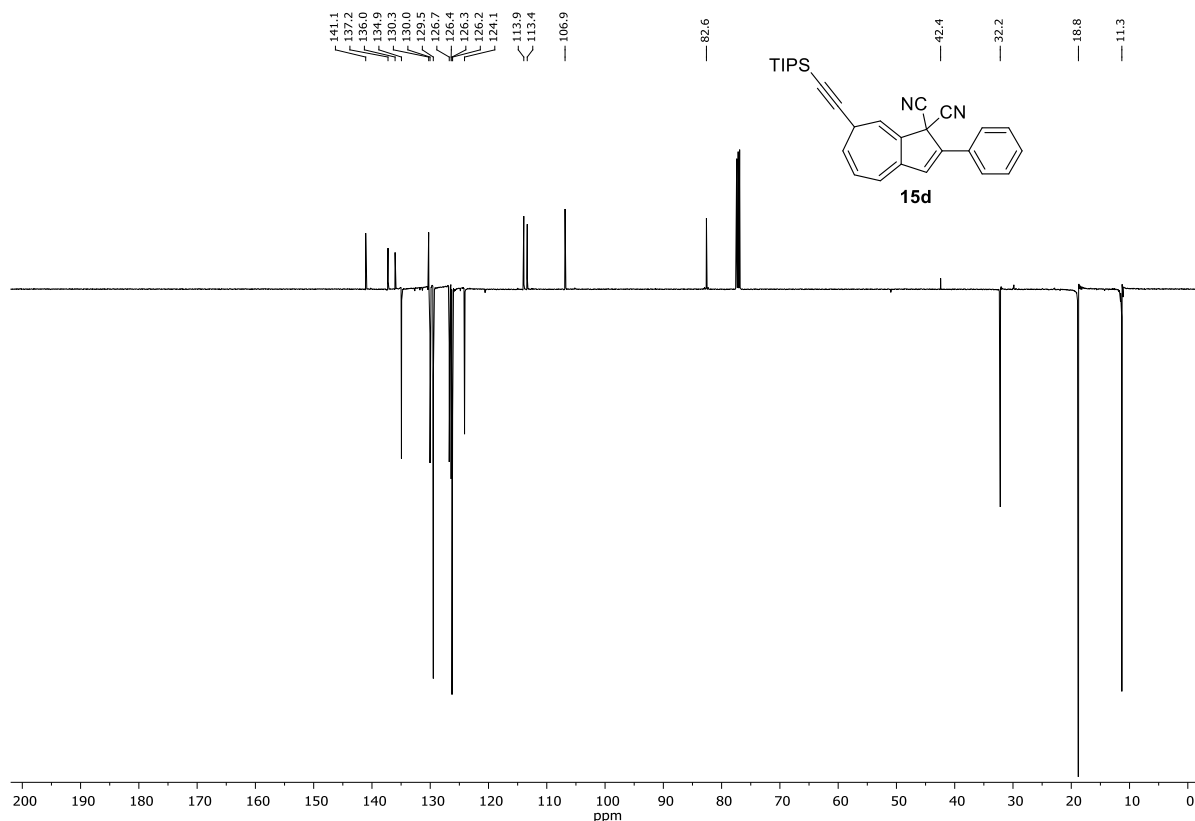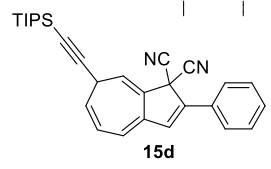

### Compound 15e

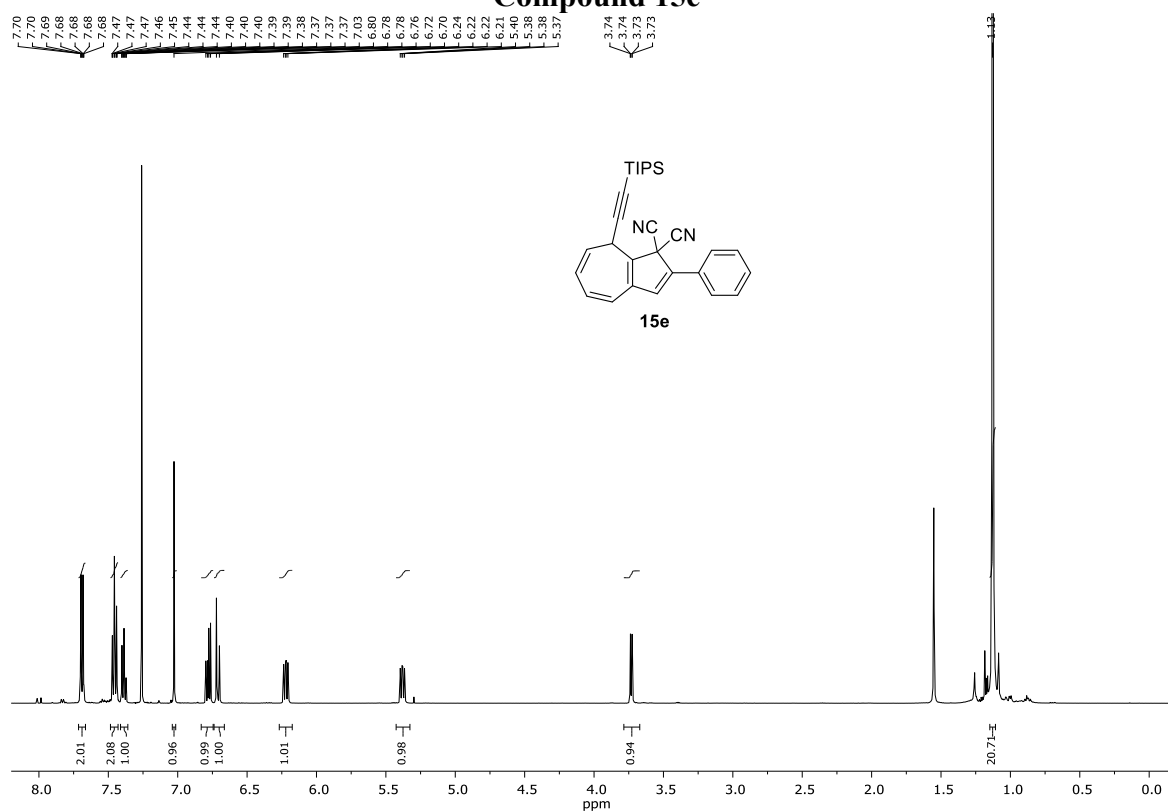

<sup>1</sup>H NMR (500 MHz) spectrum of 15e in CDCl<sub>3</sub>

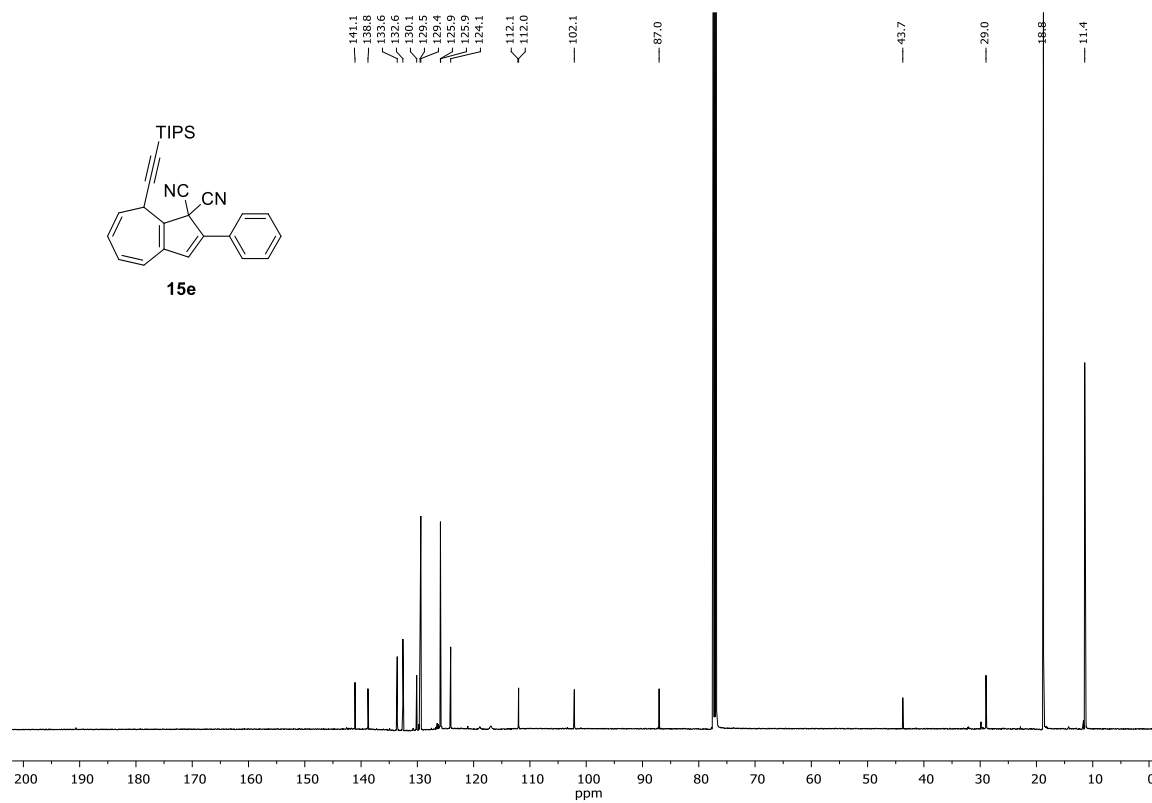

<sup>13</sup>C NMR (125 MHz) spectrum of 15e in CDCl<sub>3</sub>

### Regioisomeric mixture 16 (Table 3 Entry 2)

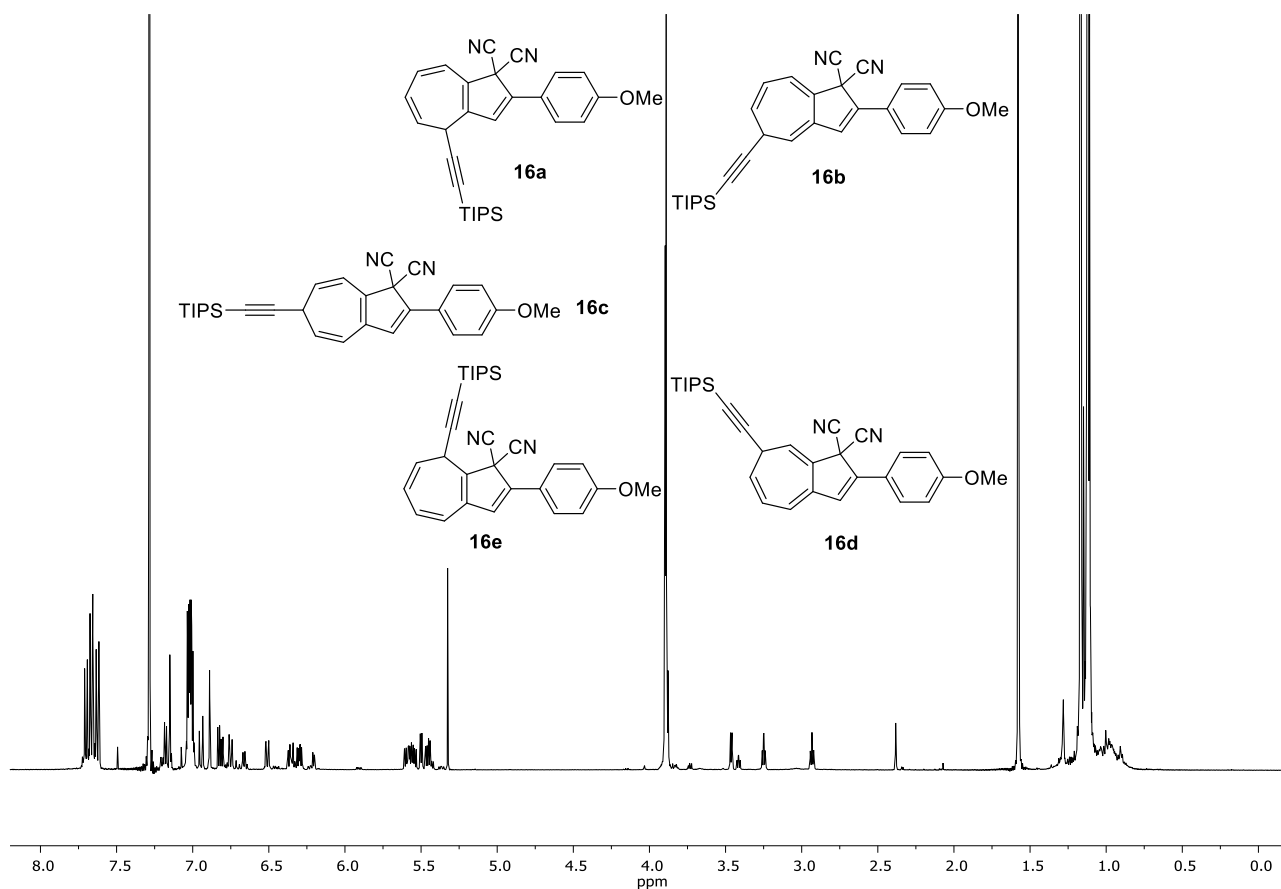

<sup>1</sup>H NMR (500 MHz) spectrum of **16** in CDCl<sub>3</sub>

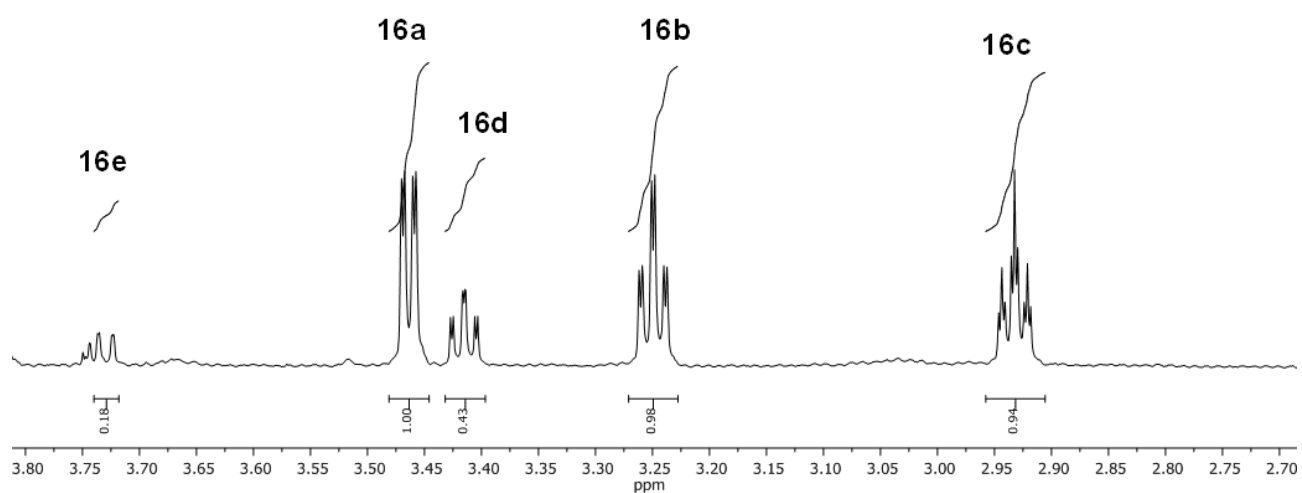

<sup>1</sup>H NMR (500 MHz) spectrum of **16** in CDCl<sub>3</sub> zoomed into the sp<sup>3</sup> region for the point of nucleophilic attack

# Compound 16a

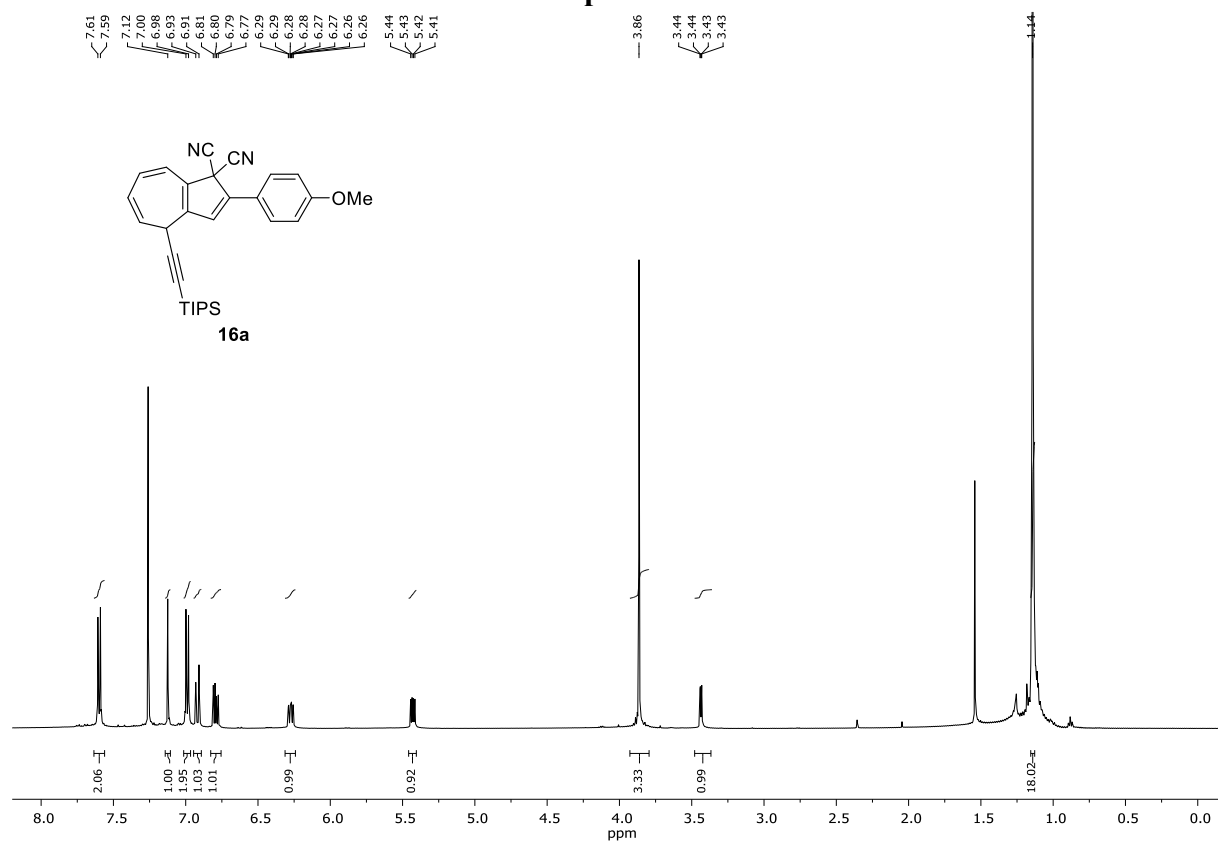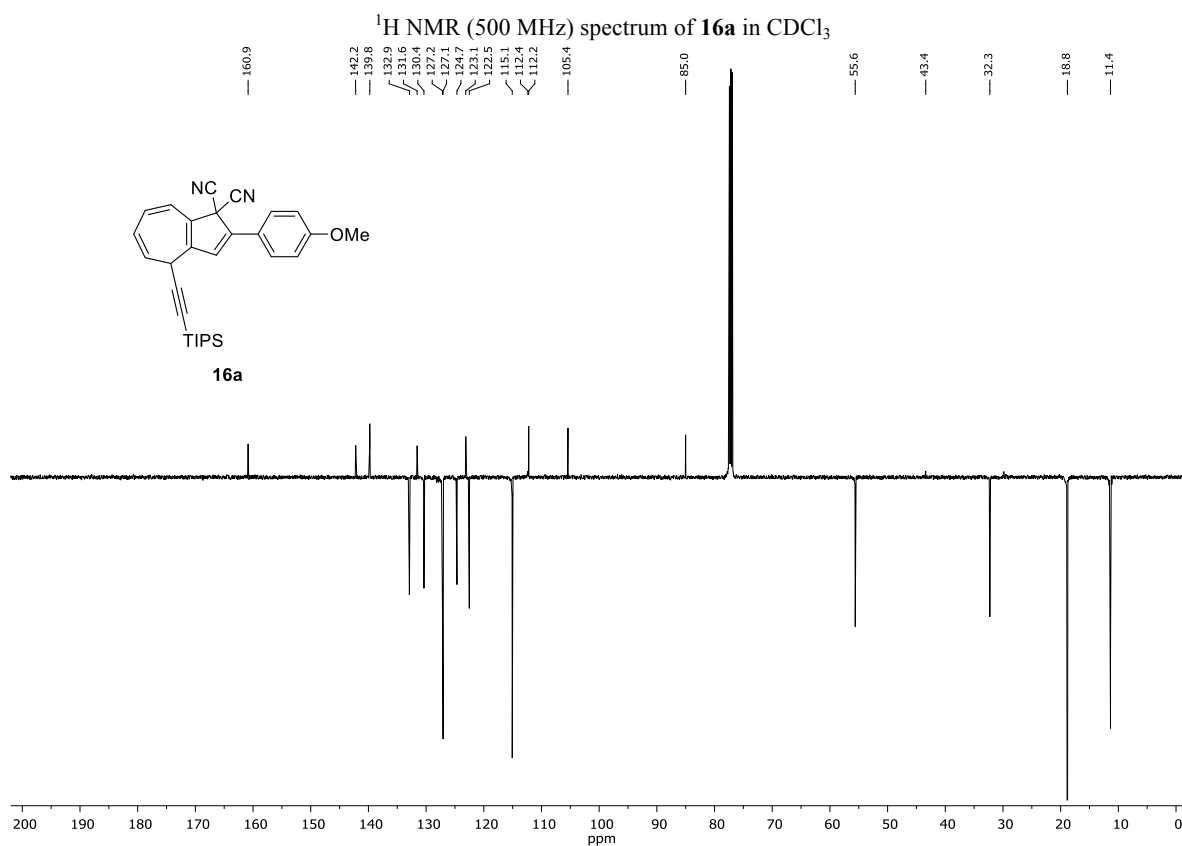

### Compound 16b

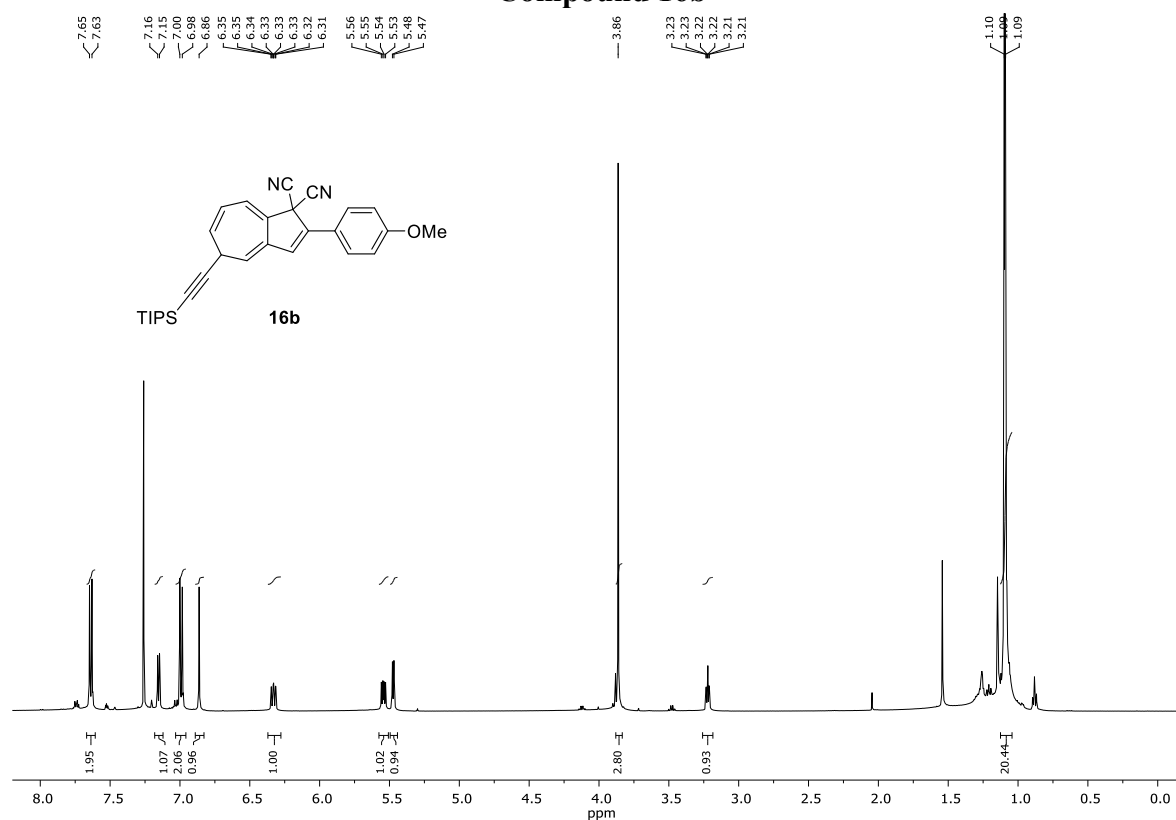

<sup>1</sup>H NMR (500 MHz) spectrum of **16b** in CDCl<sub>3</sub>

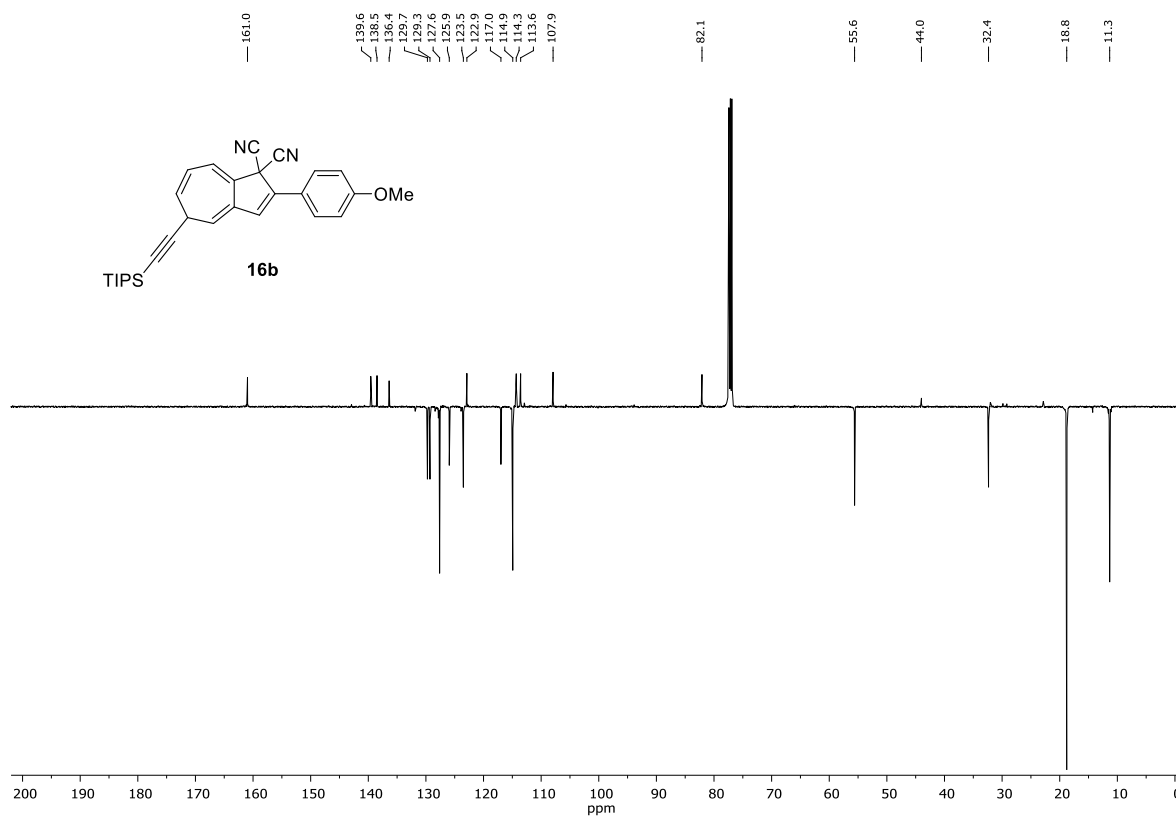

<sup>13</sup>C NMR APT (125 MHz) spectrum of **16b** in CDCl<sub>3</sub>

### Compound 16c

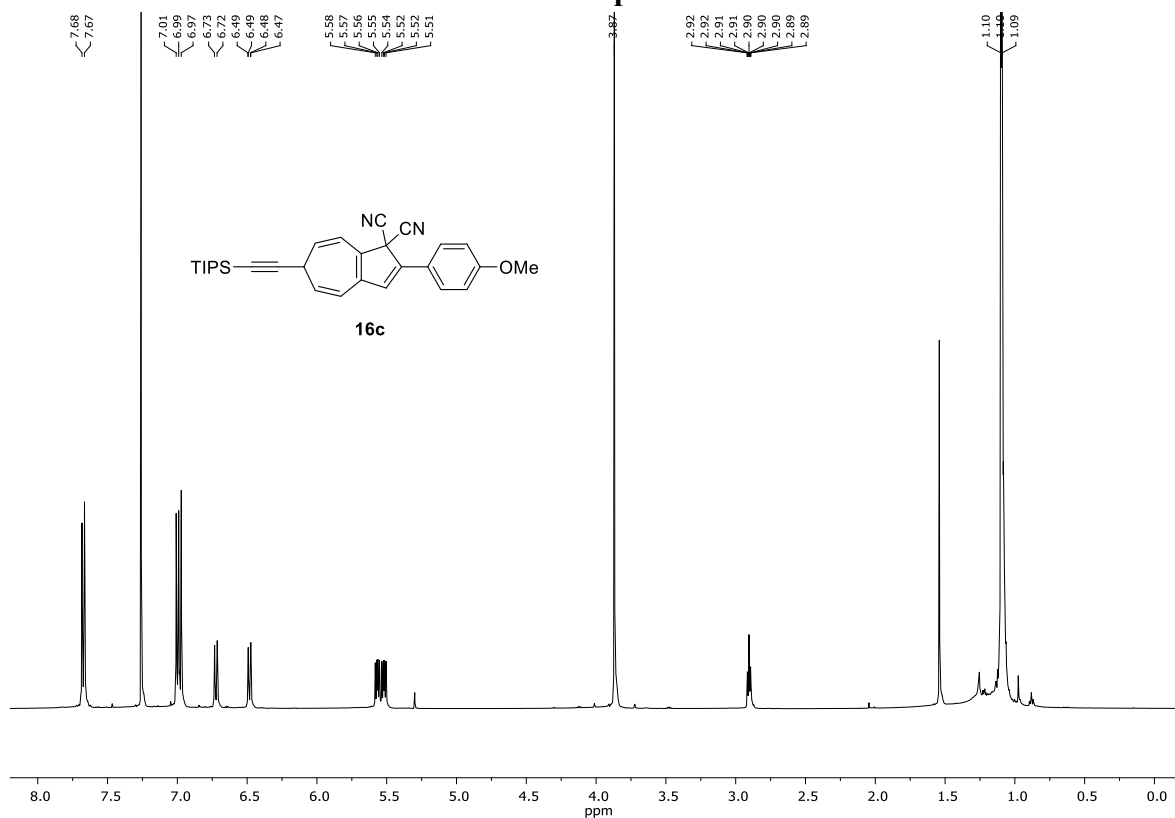

NMR (500 MHz) spectrum of **16c** in CDCl<sub>3</sub>

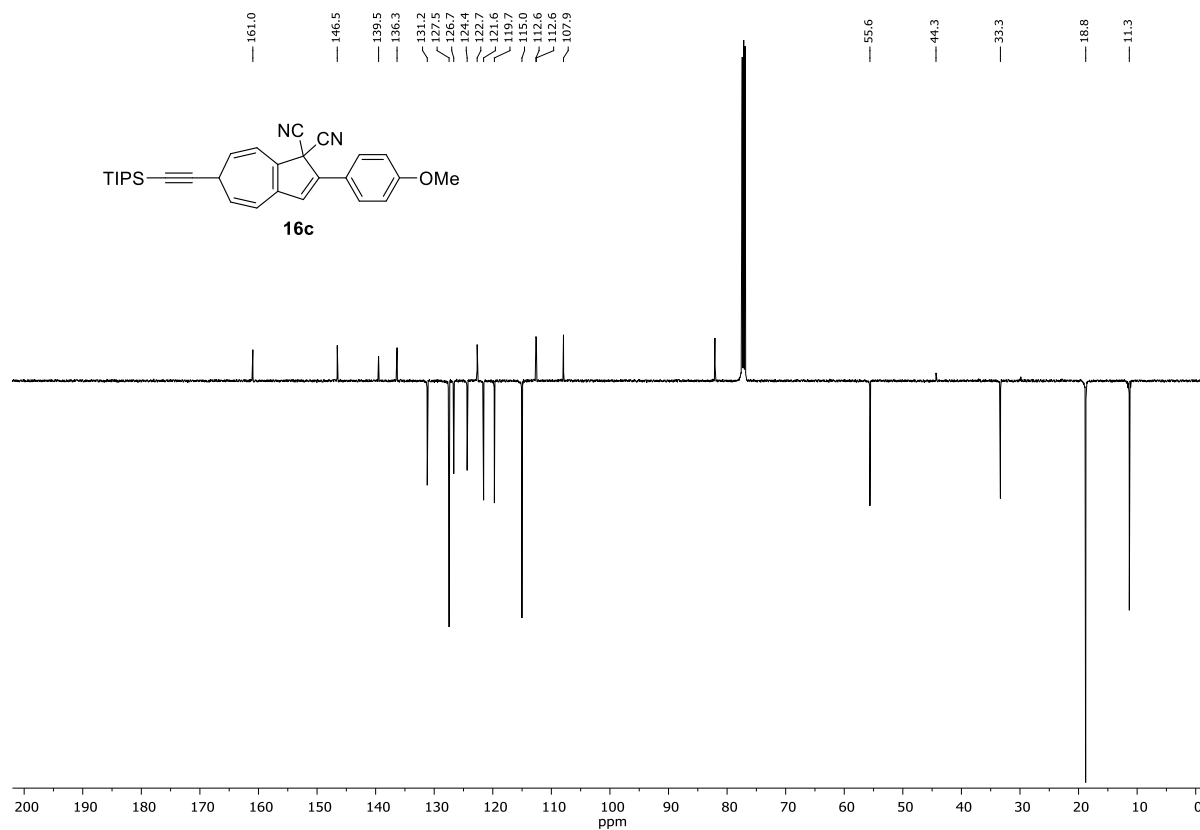

<sup>13</sup>C NMR APT (125 MHz) spectrum of **16c** in CDCl<sub>3</sub>

### Compound 16d

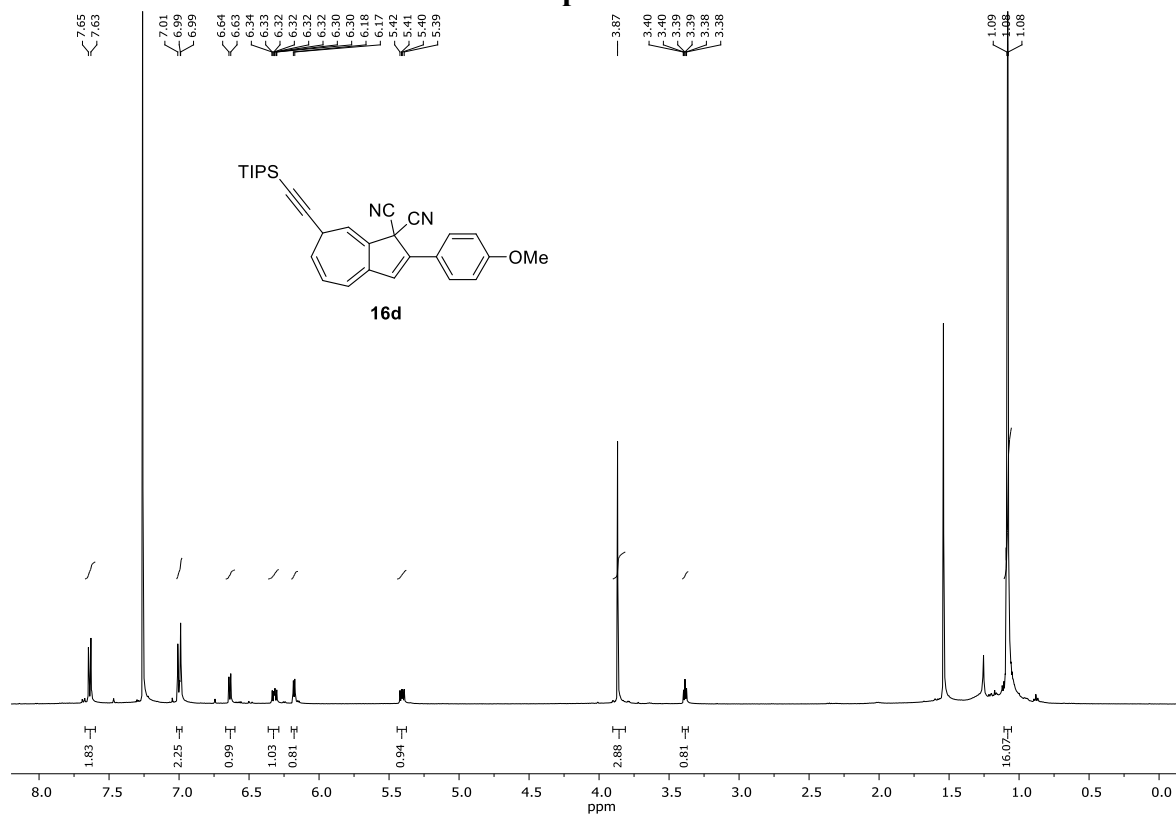

<sup>1</sup>H NMR (500 MHz) spectrum of **16d** in CDCl<sub>3</sub>

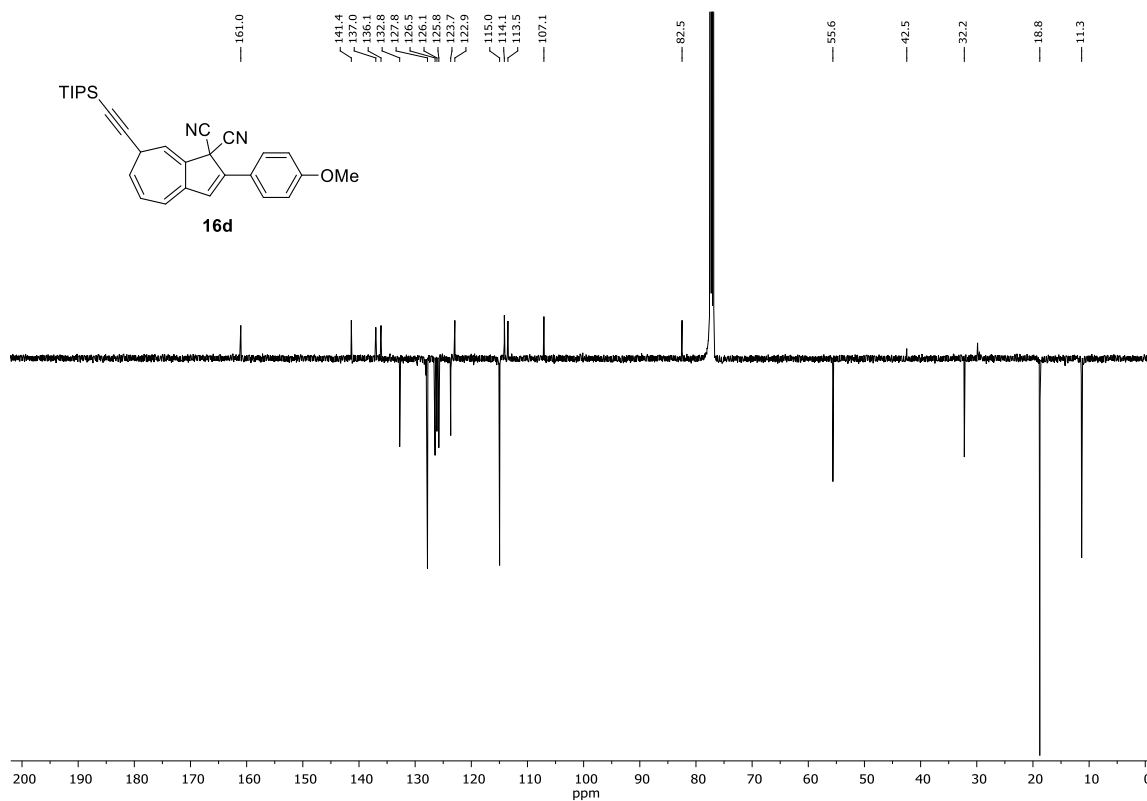

<sup>13</sup>C NMR APT (125 MHz) spectrum of **16d** in CDCl<sub>3</sub>

### Compound 16e

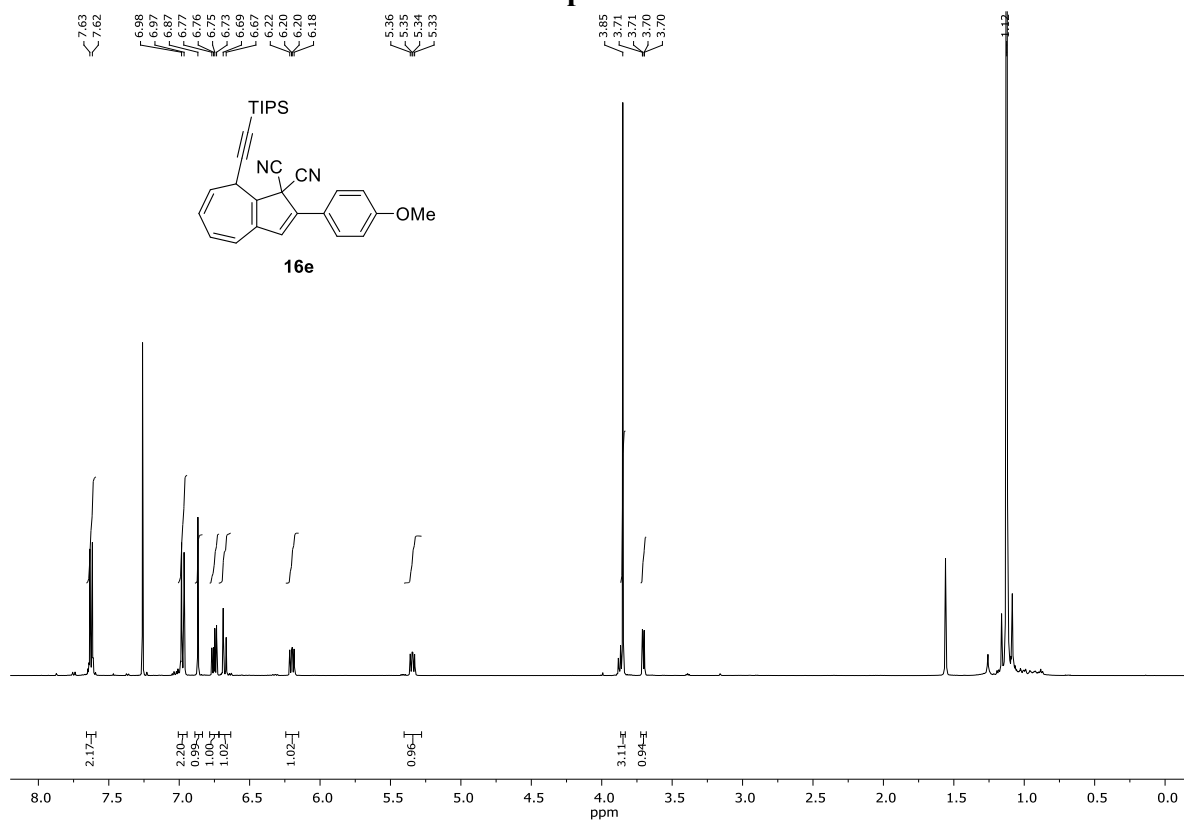

<sup>1</sup>H NMR (500 MHz) spectrum of 16e in CDCl<sub>3</sub>

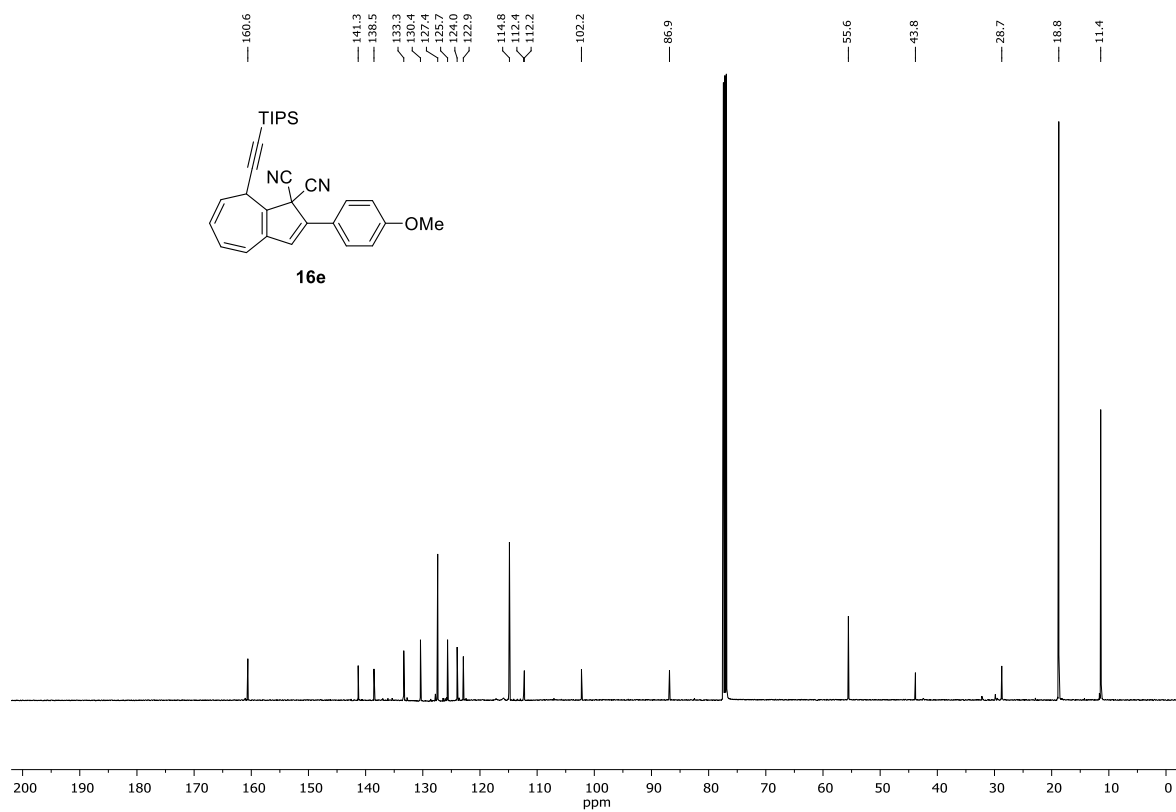

<sup>13</sup>C NMR (125 MHz) spectrum of 16e in CDCl<sub>3</sub>



**Regioisomeric mixture 17 (Table 3 Entry 3)**

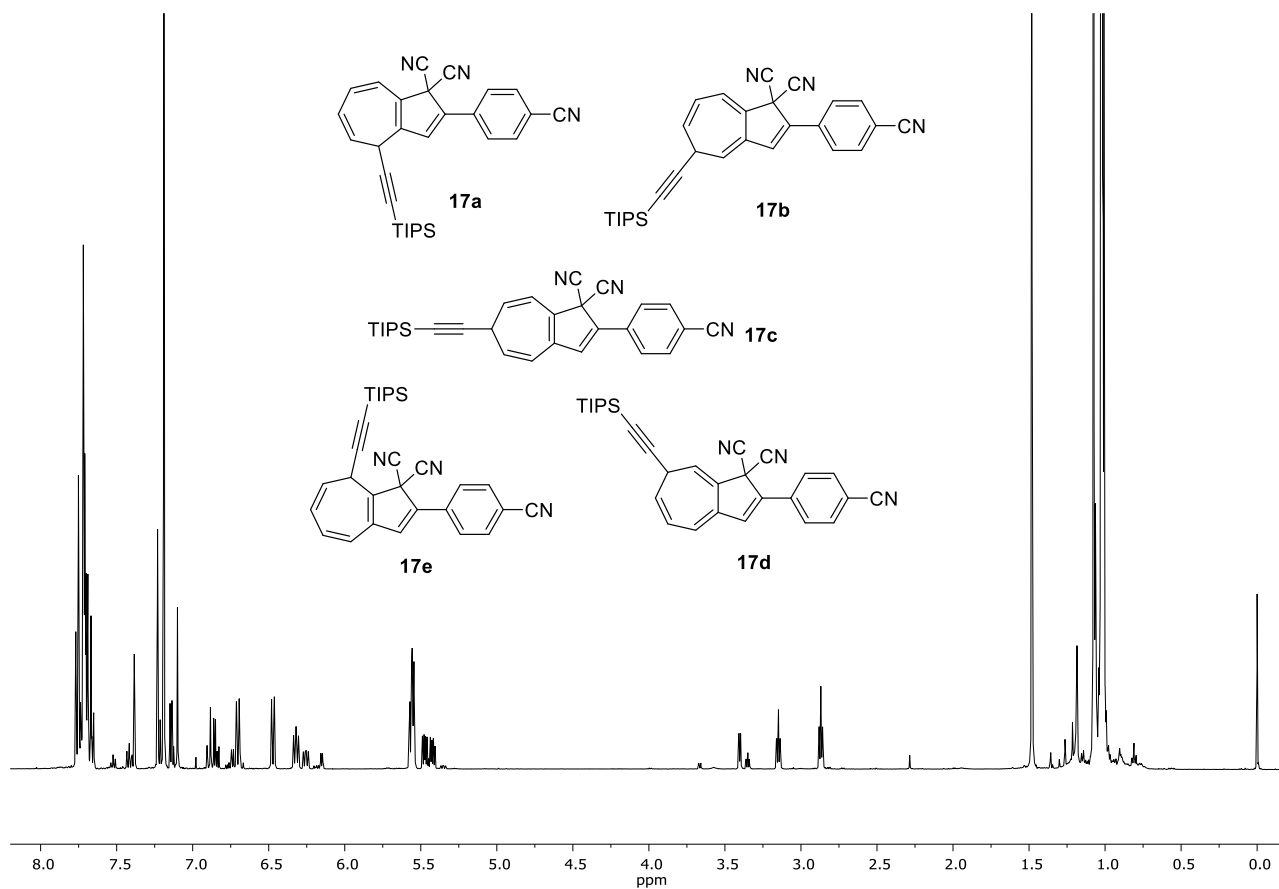

<sup>1</sup>H NMR (500 MHz) spectrum of 17 in CDCl<sub>3</sub>

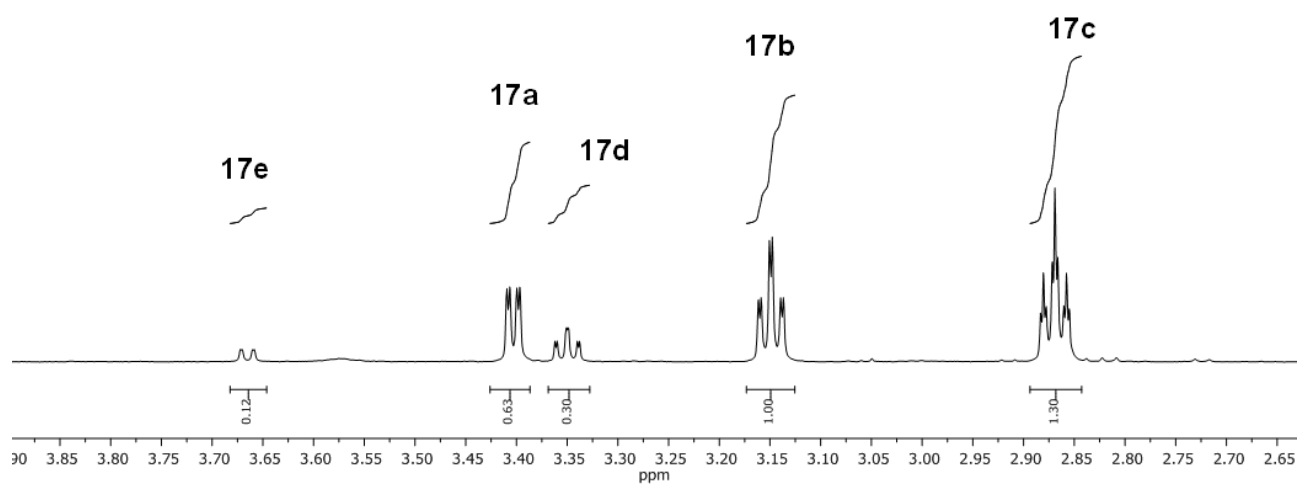

<sup>1</sup>H NMR (500 MHz) spectrum of 17 in CDCl<sub>3</sub> zoomed into the sp<sup>3</sup> region for the point of nucleophilic attack

# Compound 17a

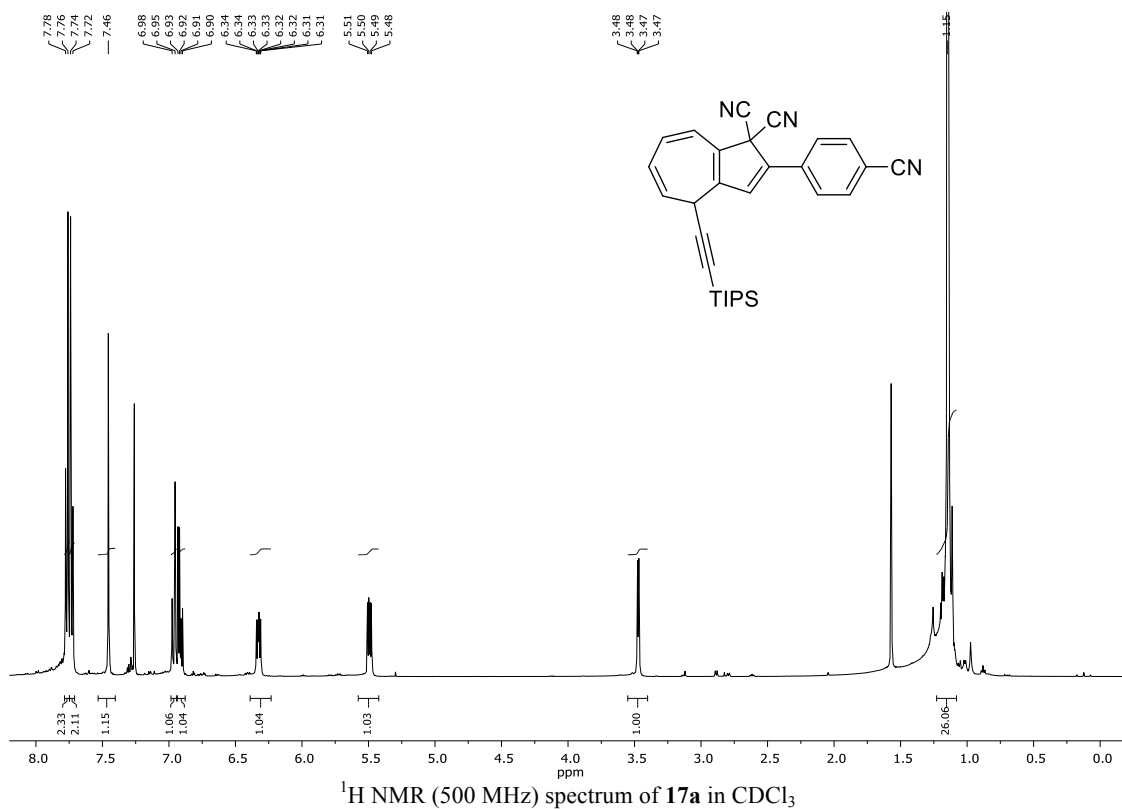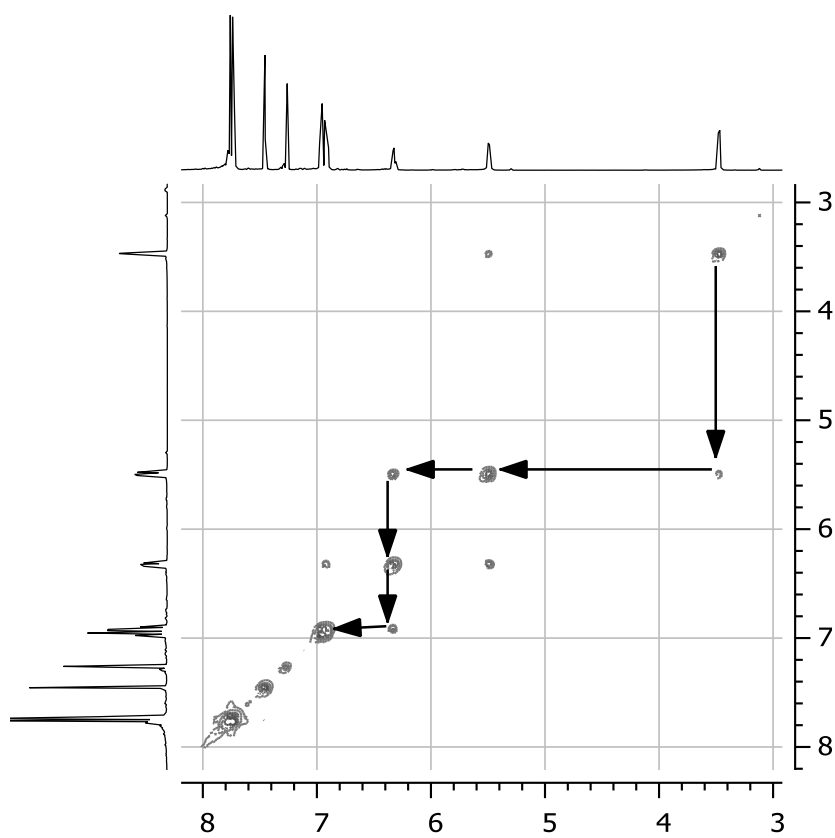

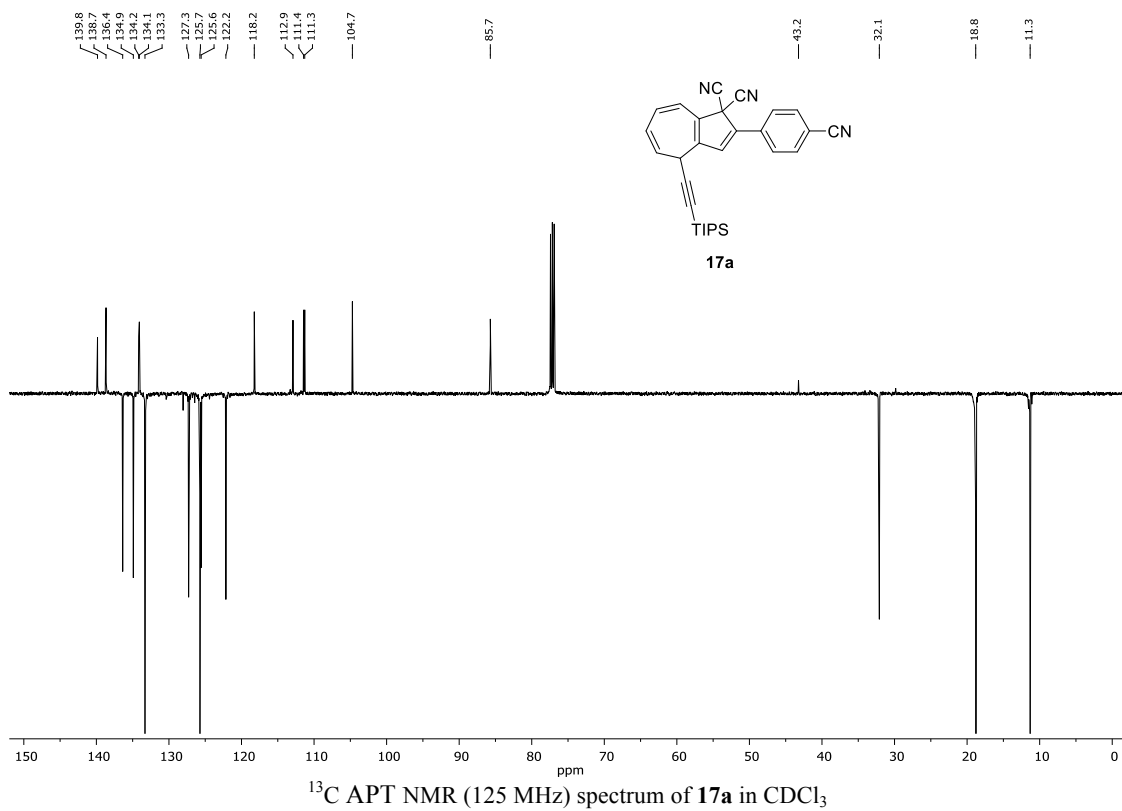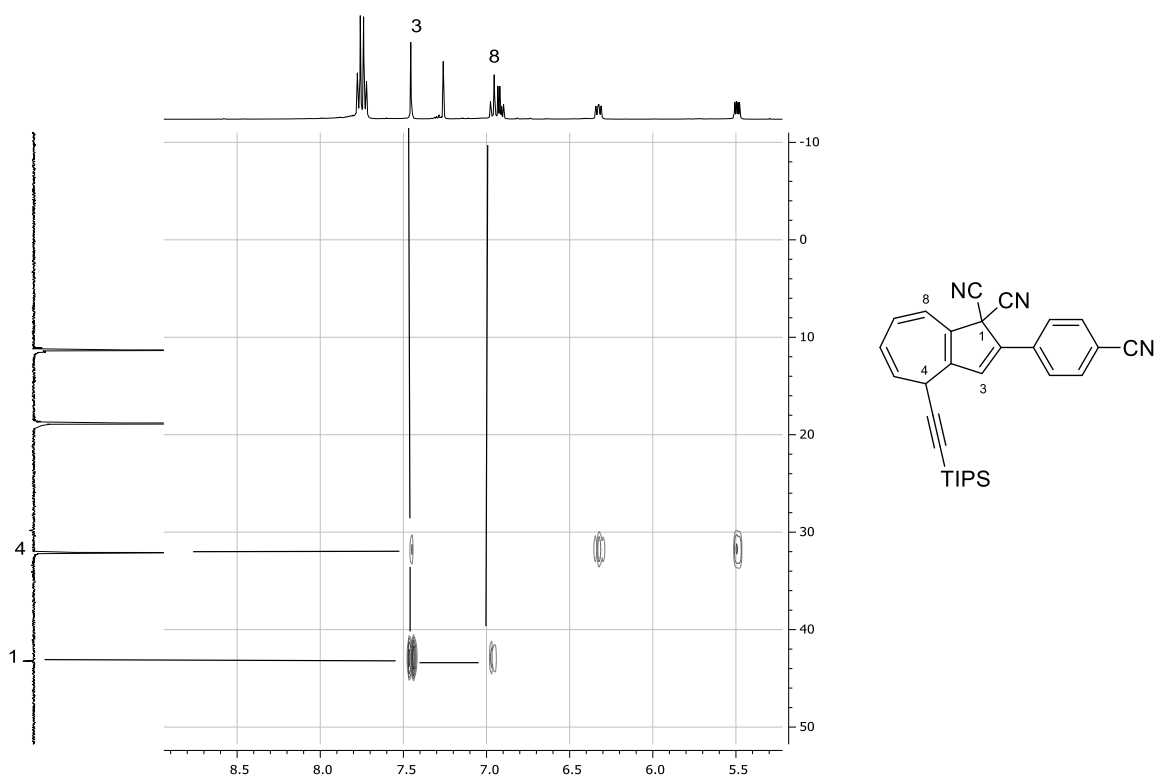

HMBC spectrum (500 MHz / 125 MHz) of **17a** in CDCl<sub>3</sub>

### Compound 17b

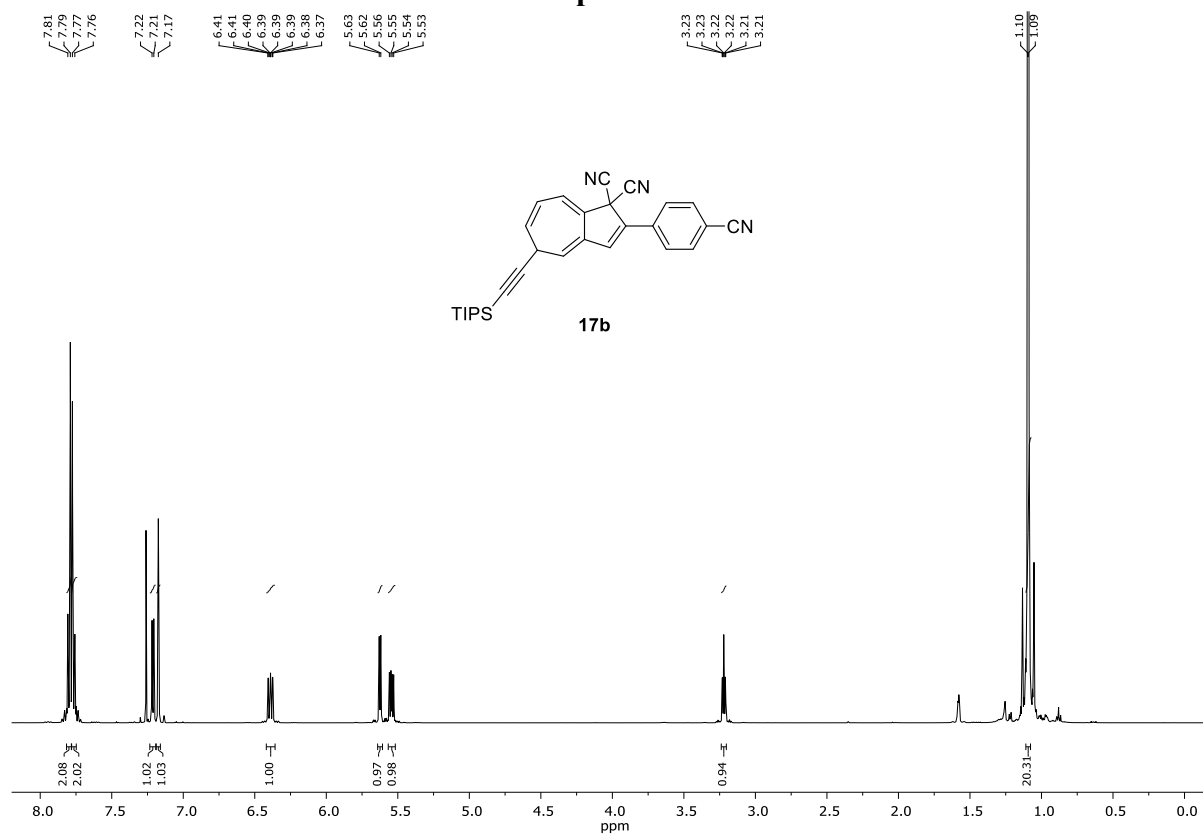

<sup>1</sup>H NMR (500 MHz) spectrum of **17b** in CDCl<sub>3</sub>

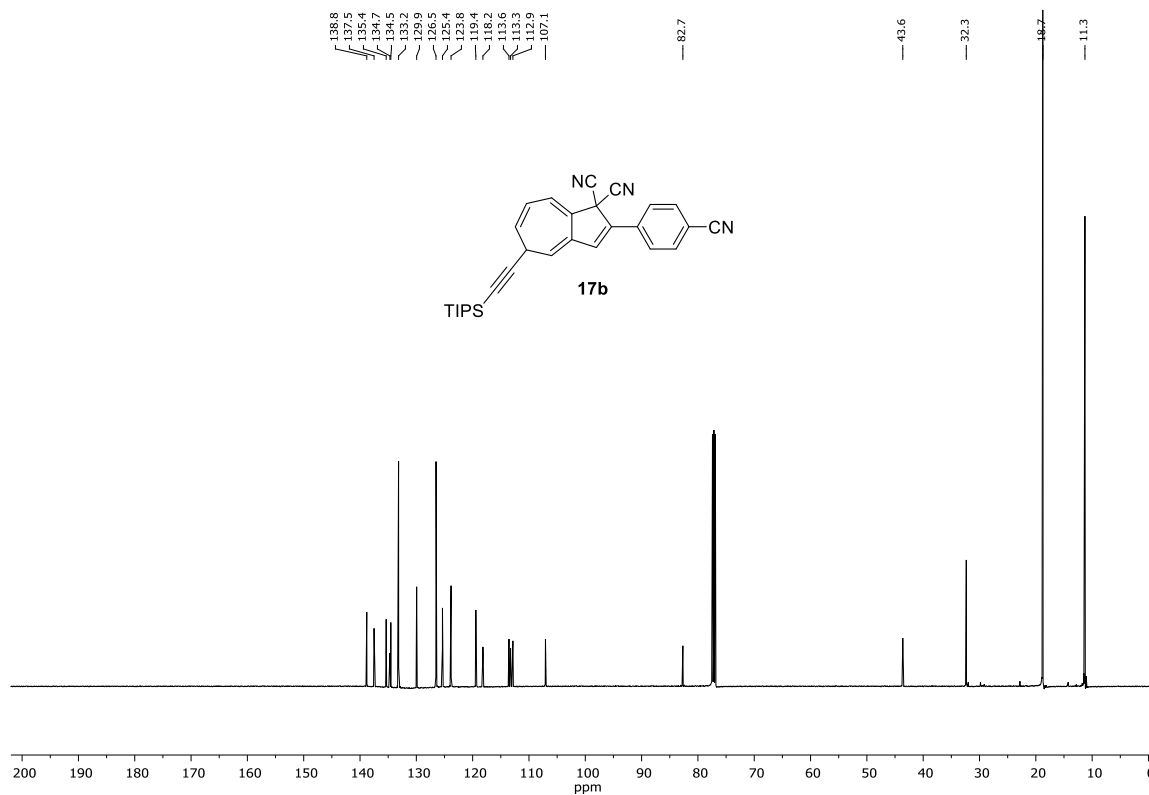

<sup>13</sup>C NMR (125 MHz) spectrum of **17b** in CDCl<sub>3</sub>

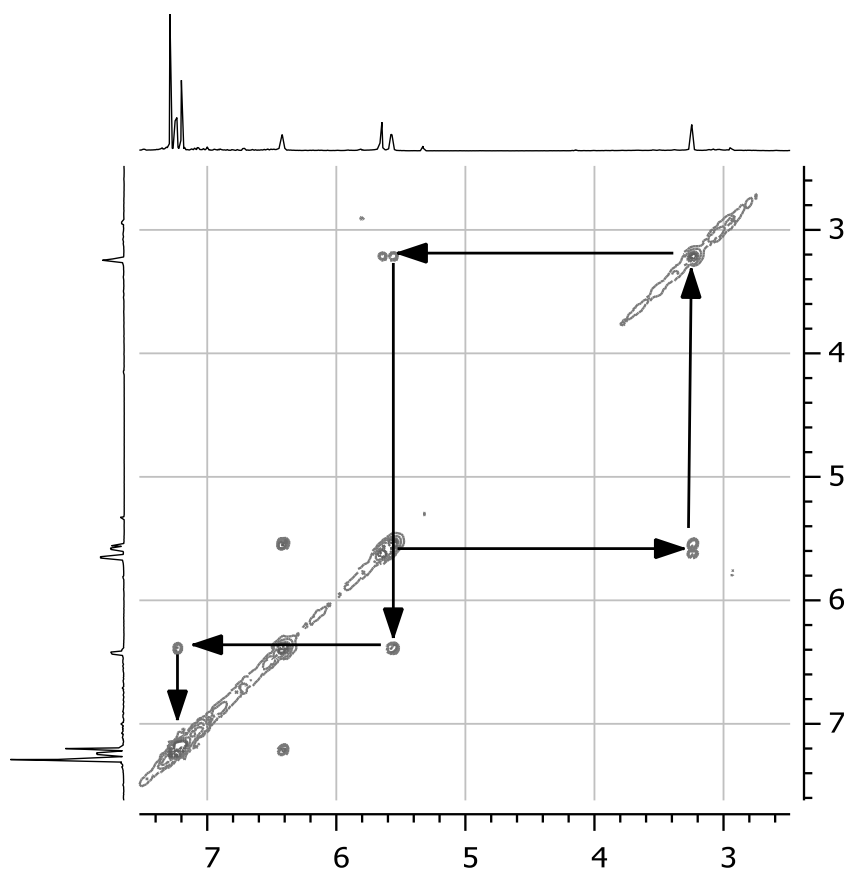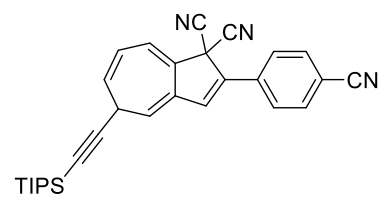

COSY spectrum (500 MHz) of **17b** in CDCl<sub>3</sub>

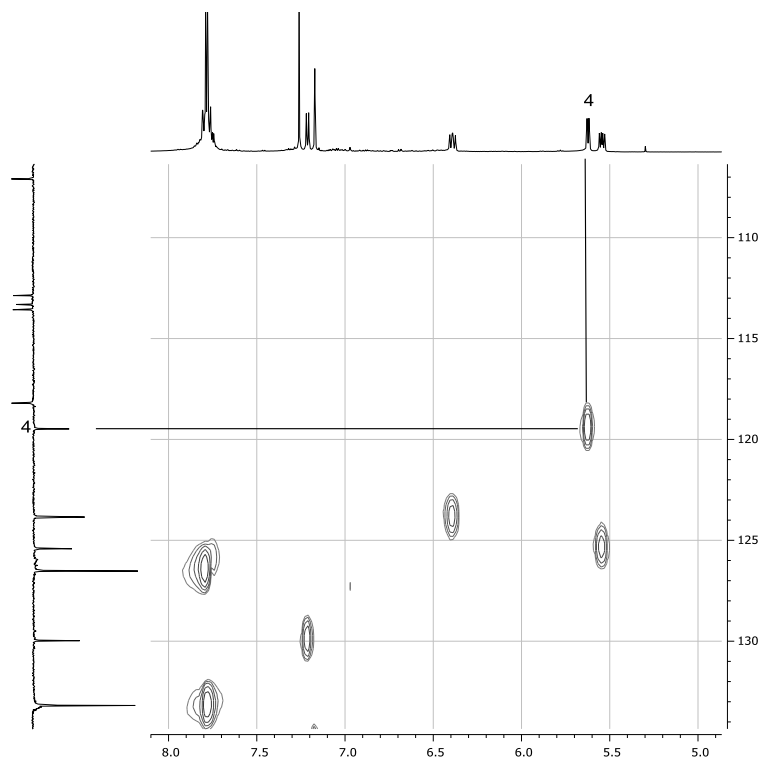

HSQC spectrum (500 MHz / 125 MHz) of **17b** in CDCl<sub>3</sub>

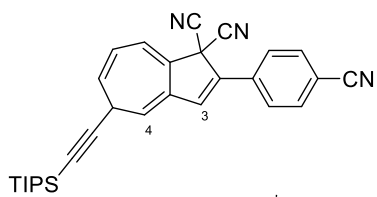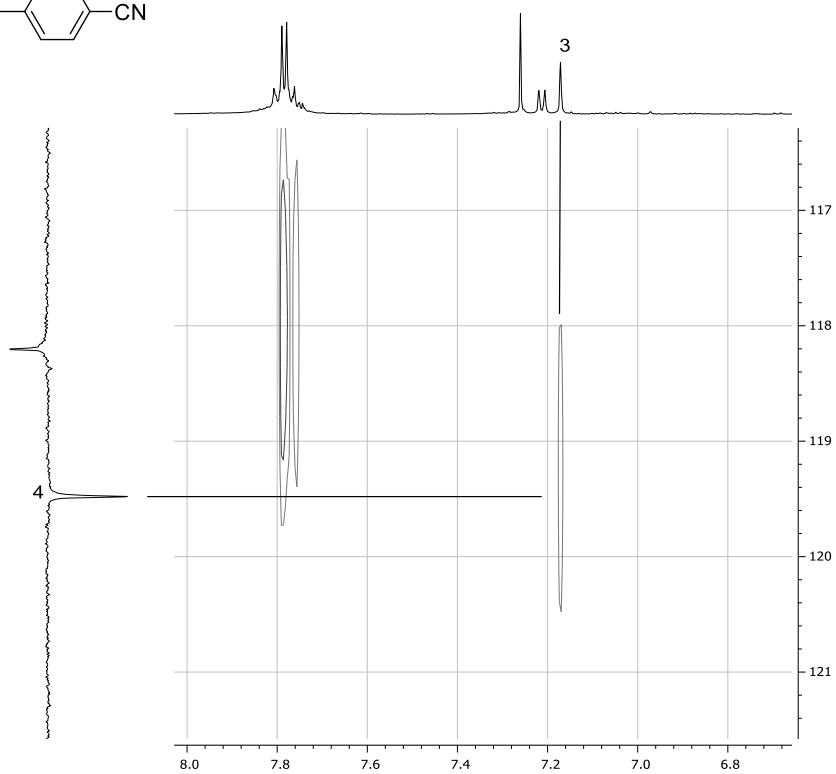

HMBC spectrum (500 MHz / 125 MHz) of **17b** in CDCl<sub>3</sub>

### Compound 17c

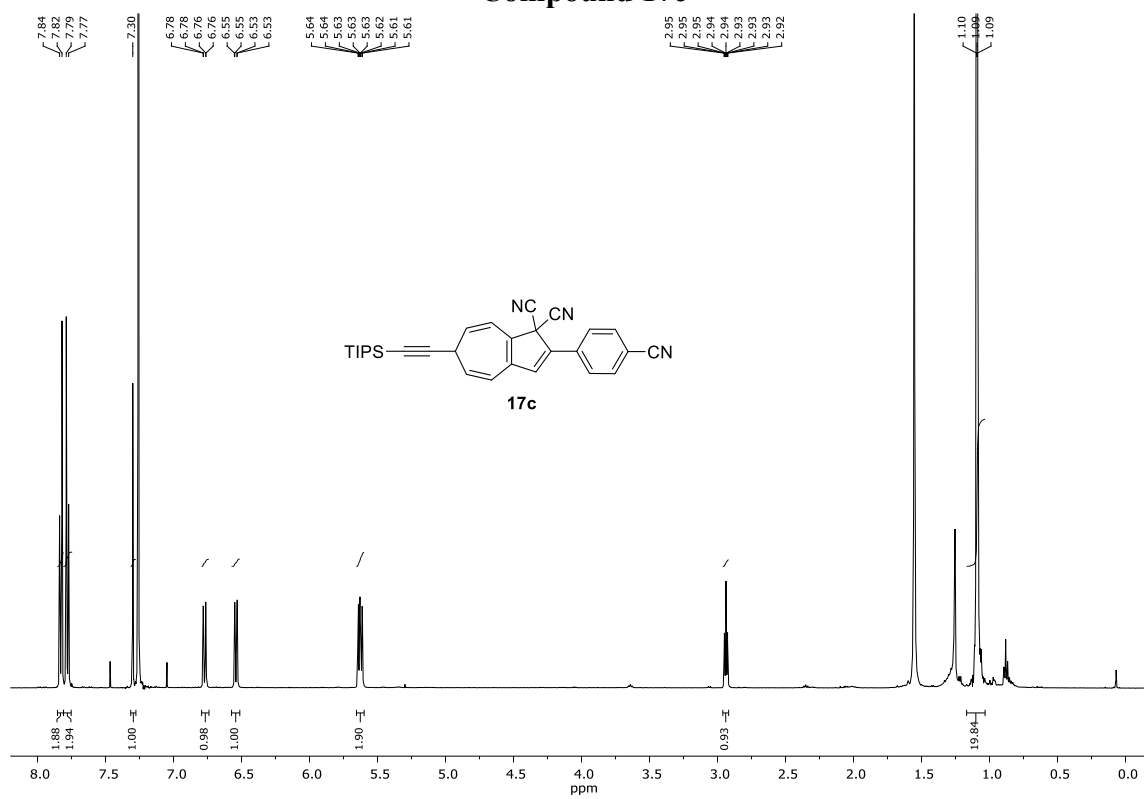

<sup>1</sup>H NMR (500 MHz) spectrum of 17c in CDCl<sub>3</sub>

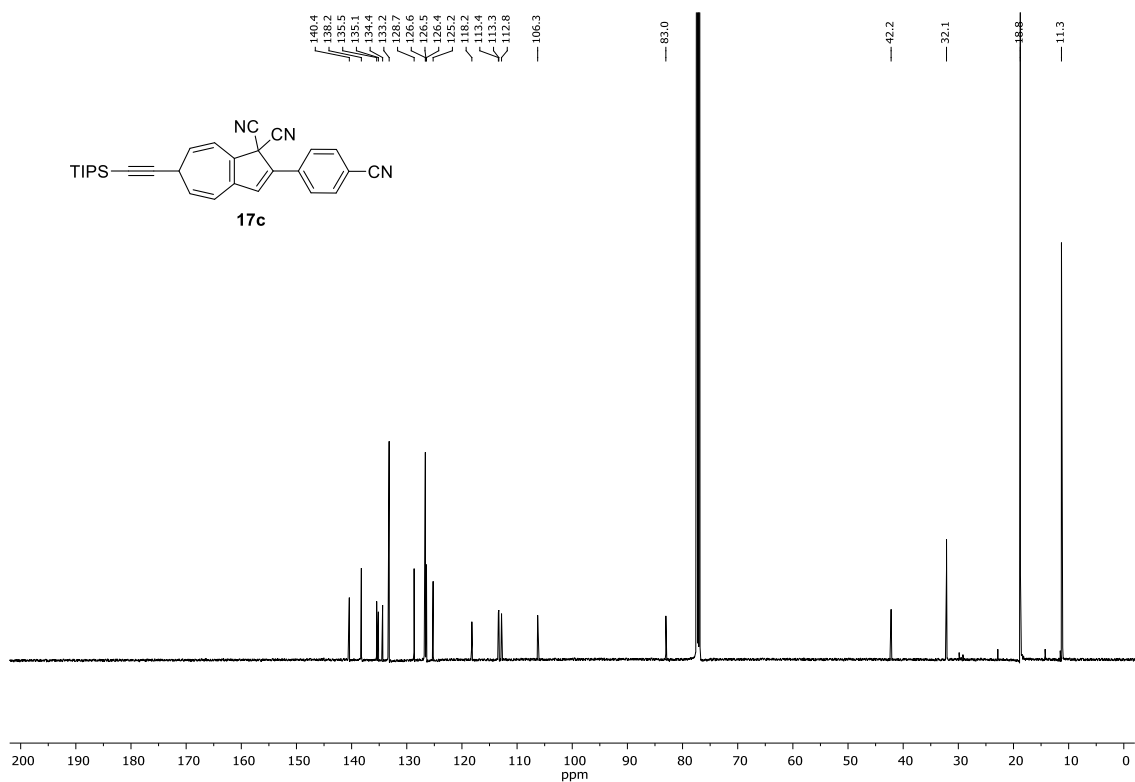

<sup>13</sup>C NMR (125 MHz) spectrum of 17c in CDCl<sub>3</sub>





### Compound 17d

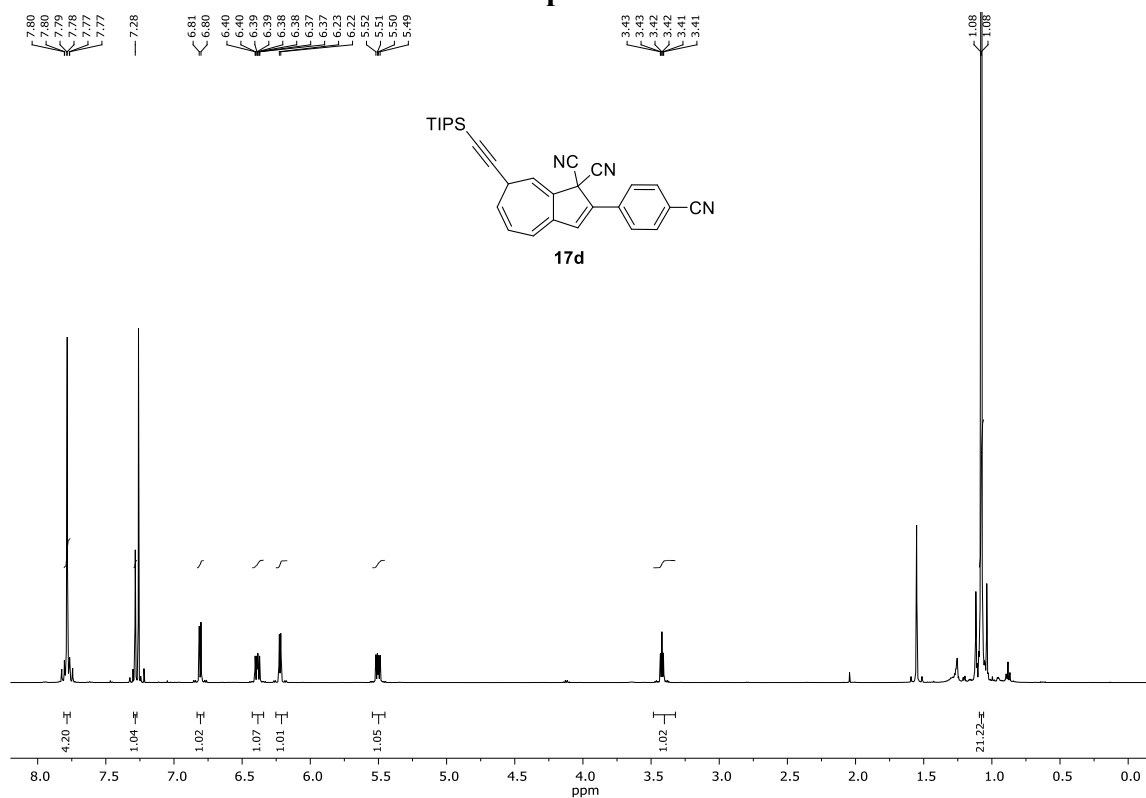

<sup>1</sup>H NMR (500 MHz) spectrum of **17d** in CDCl<sub>3</sub>

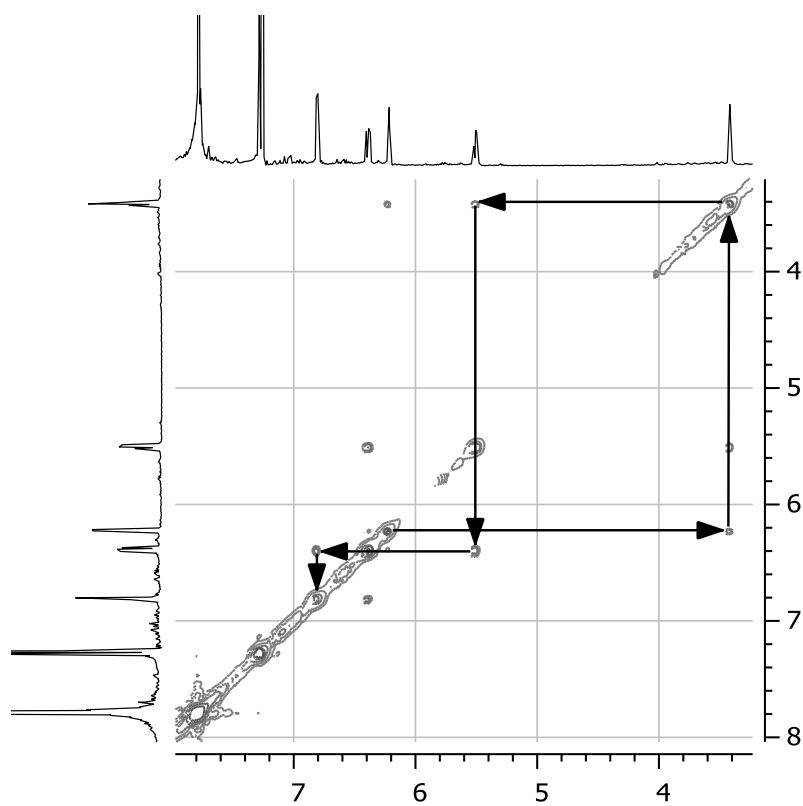

COSY spectrum (500 MHz) of **17d** in CDCl<sub>3</sub>

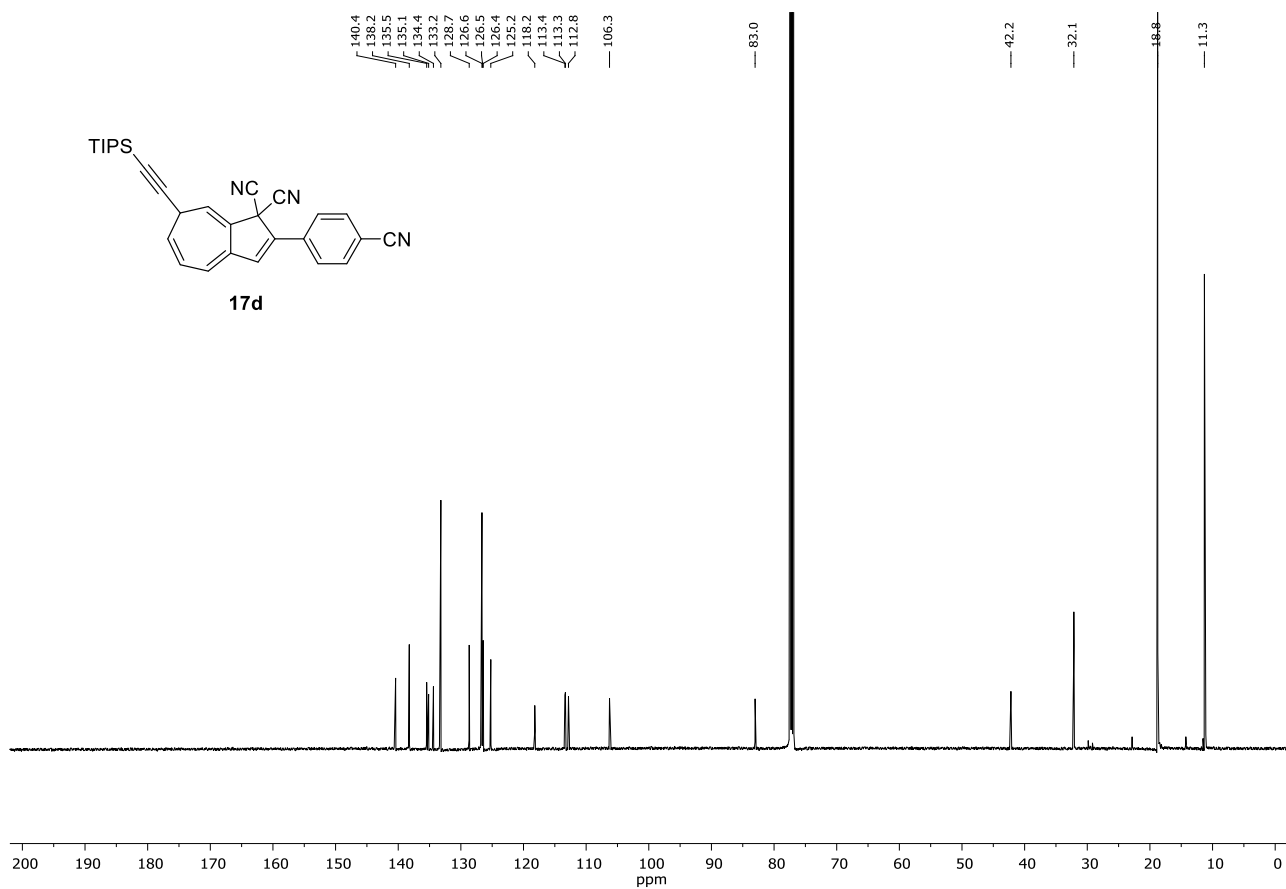

$^{13}\text{C}$  NMR (125 MHz) spectrum of **17d** in  $\text{CDCl}_3$

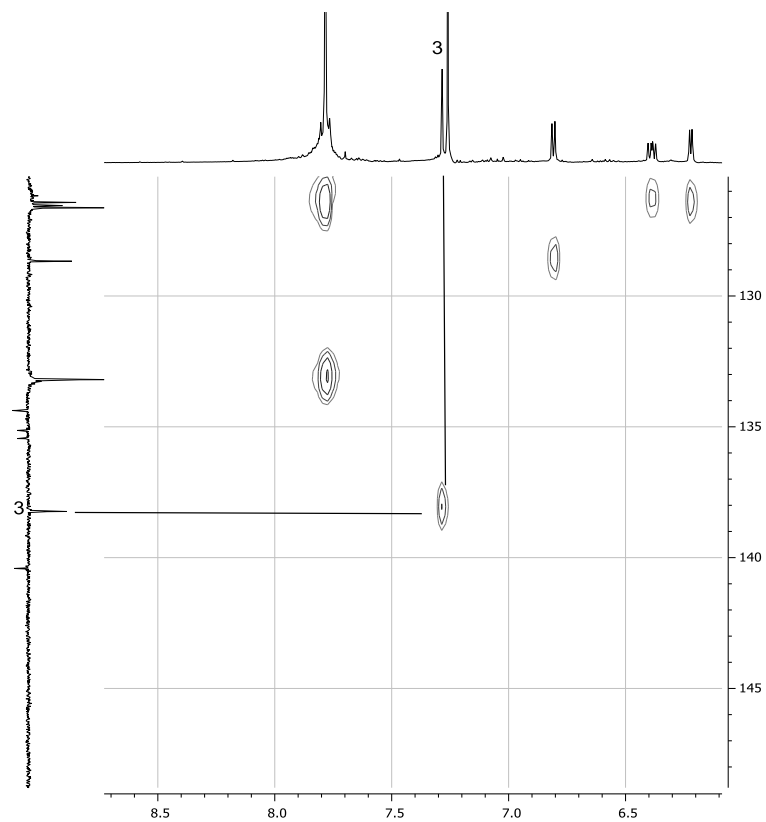

HSQC spectrum (500 MHz / 125 MHz) of **17d** in CDCl<sub>3</sub>

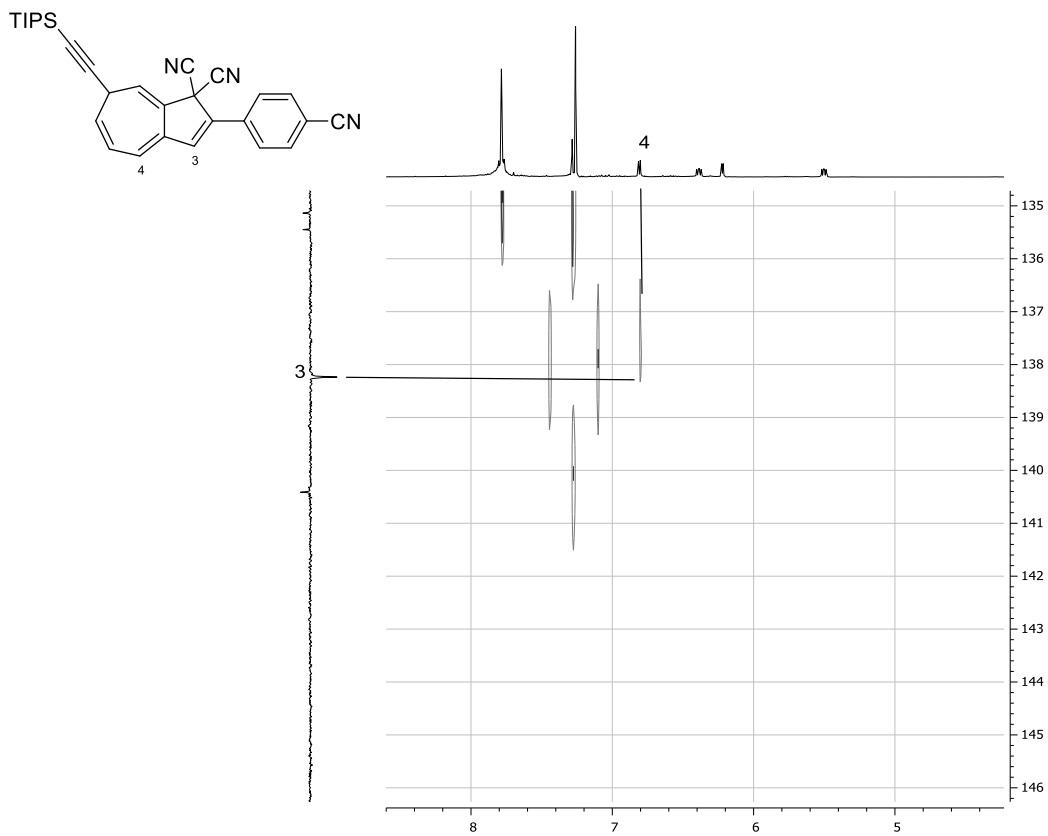

HMBC spectrum (500 MHz / 125 MHz) of **17d** in CDCl<sub>3</sub>

### Compound 17e

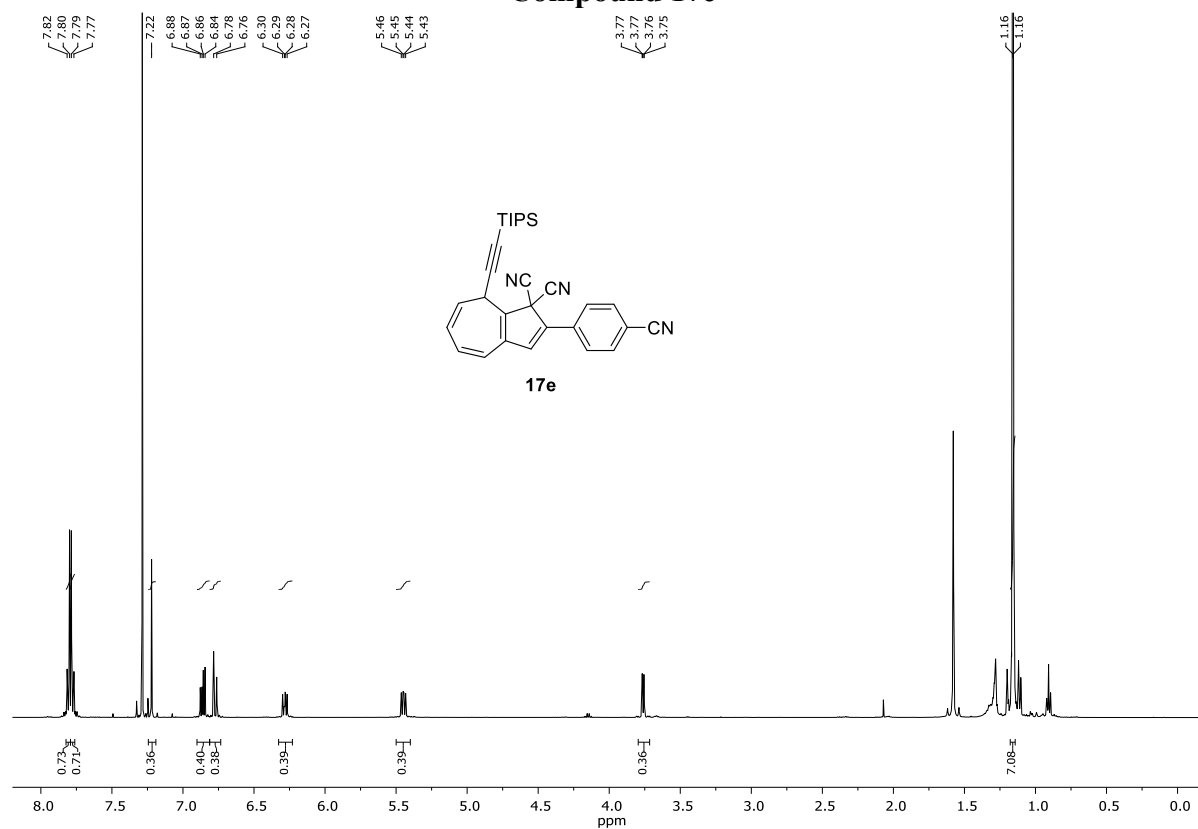

<sup>1</sup>H NMR (500 MHz) spectrum of **17e** in CDCl<sub>3</sub>

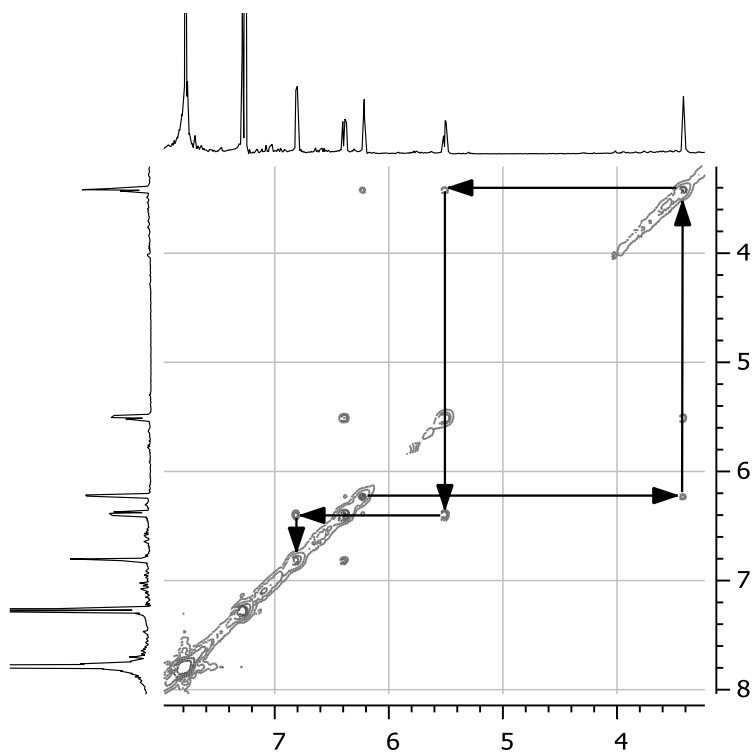

COSY spectrum (500 MHz) of **17e** in CDCl<sub>3</sub>

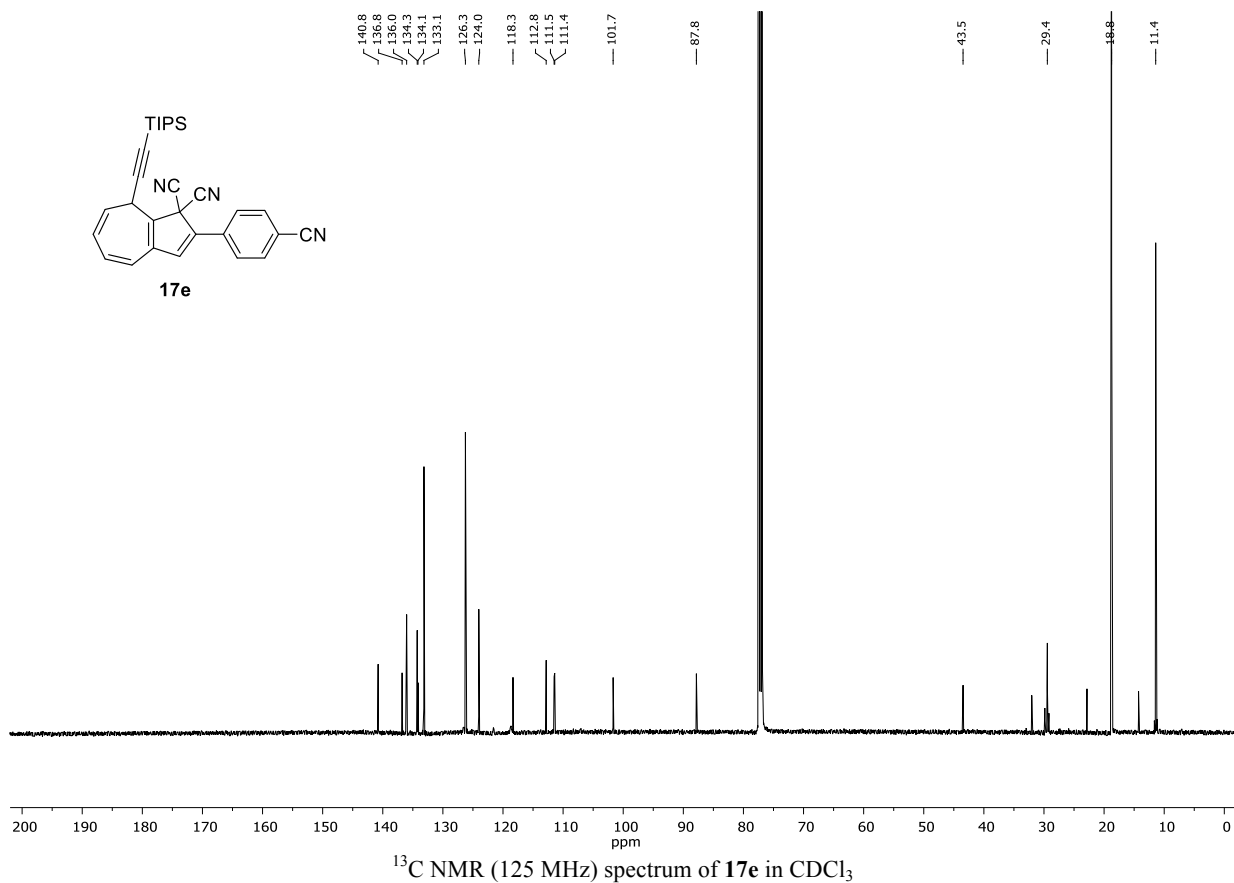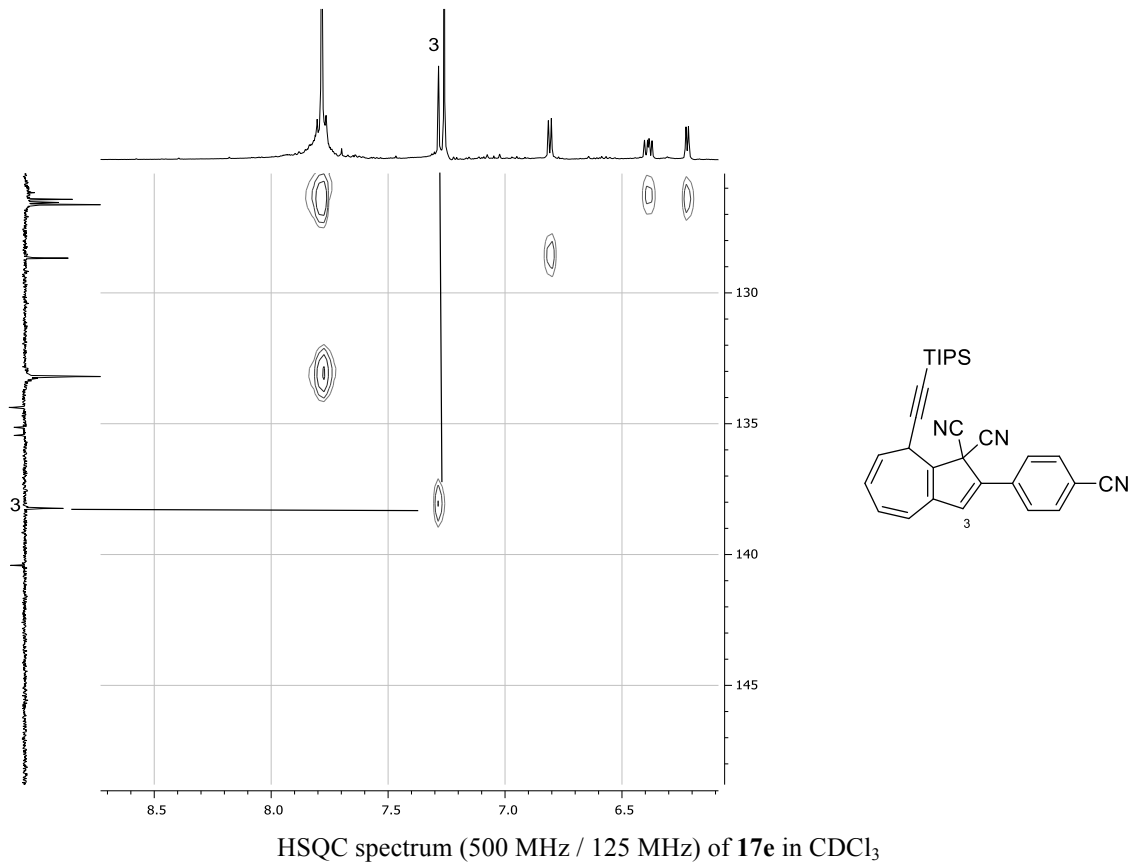

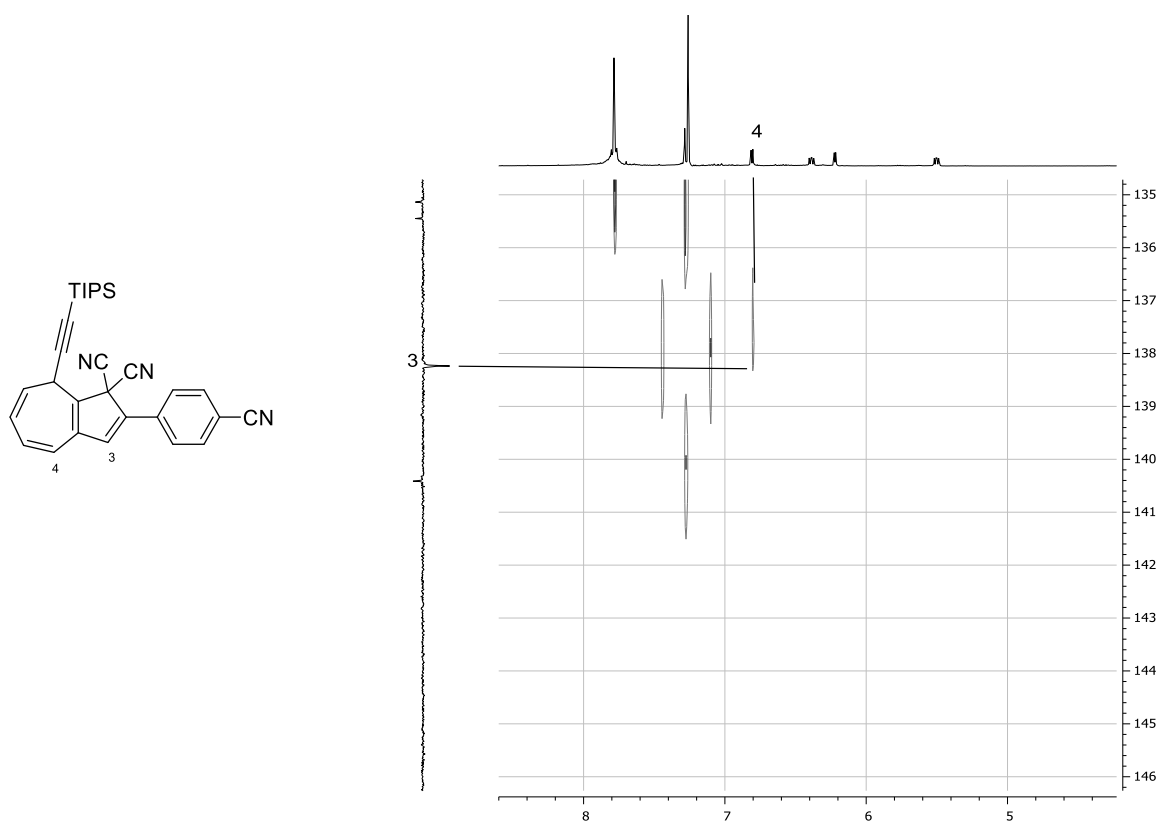

HMBC spectrum (500 MHz / 125 MHz) of **17e** in  $\text{CDCl}_3$

Regioisomeric mixture **18** (Table 3 Entry 4)

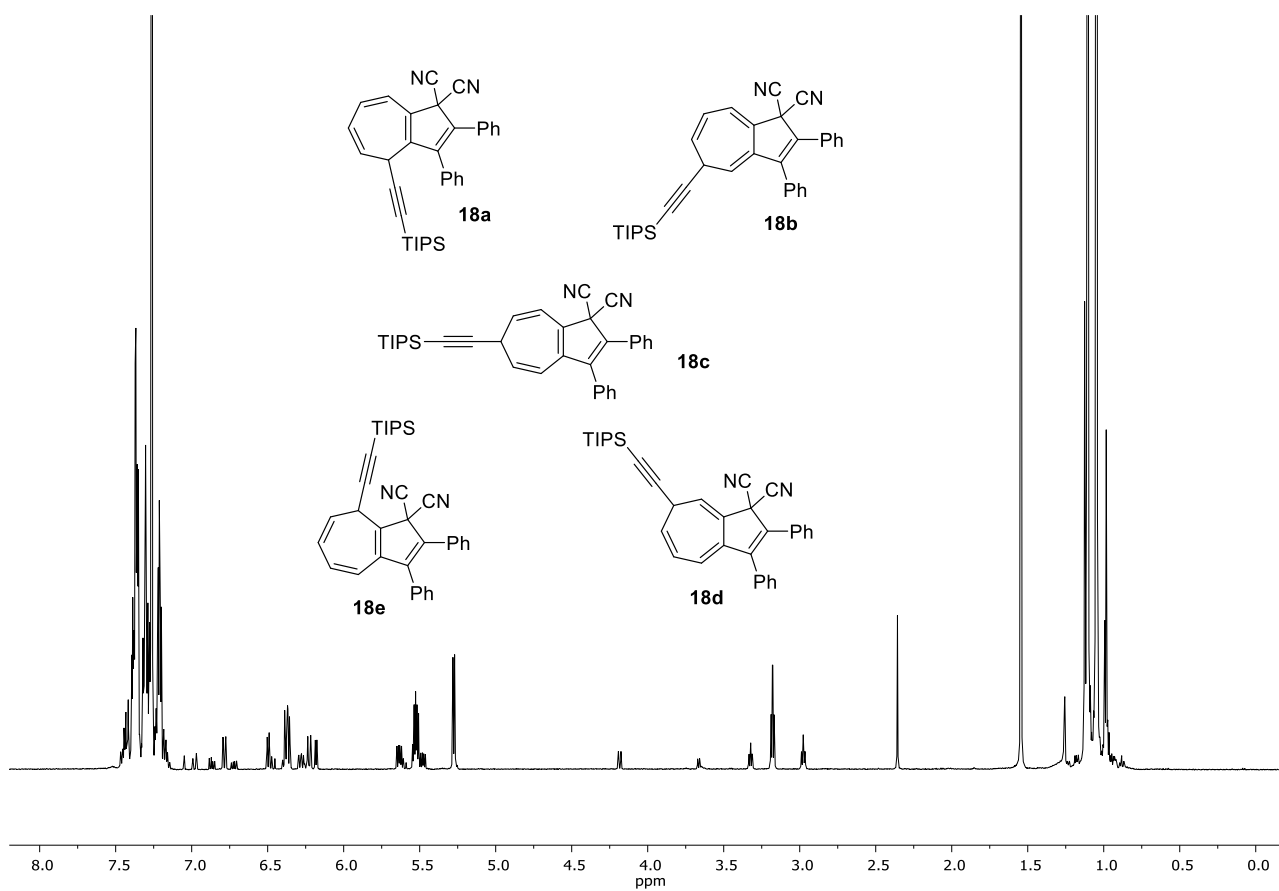

$^1\text{H}$  NMR (500 MHz) spectrum of **18** in  $\text{CDCl}_3$

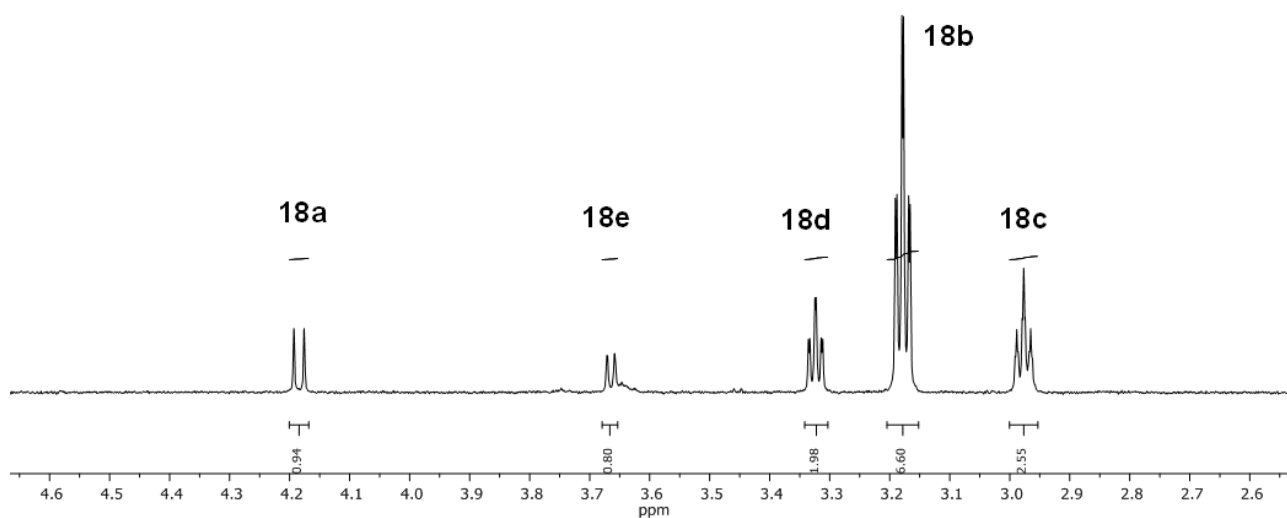

$^1\text{H}$  NMR (500 MHz) spectrum of **18** in  $\text{CDCl}_3$  zoomed into the  $\text{sp}^3$  region for the point of nucleophilic attack

# Compound 18a

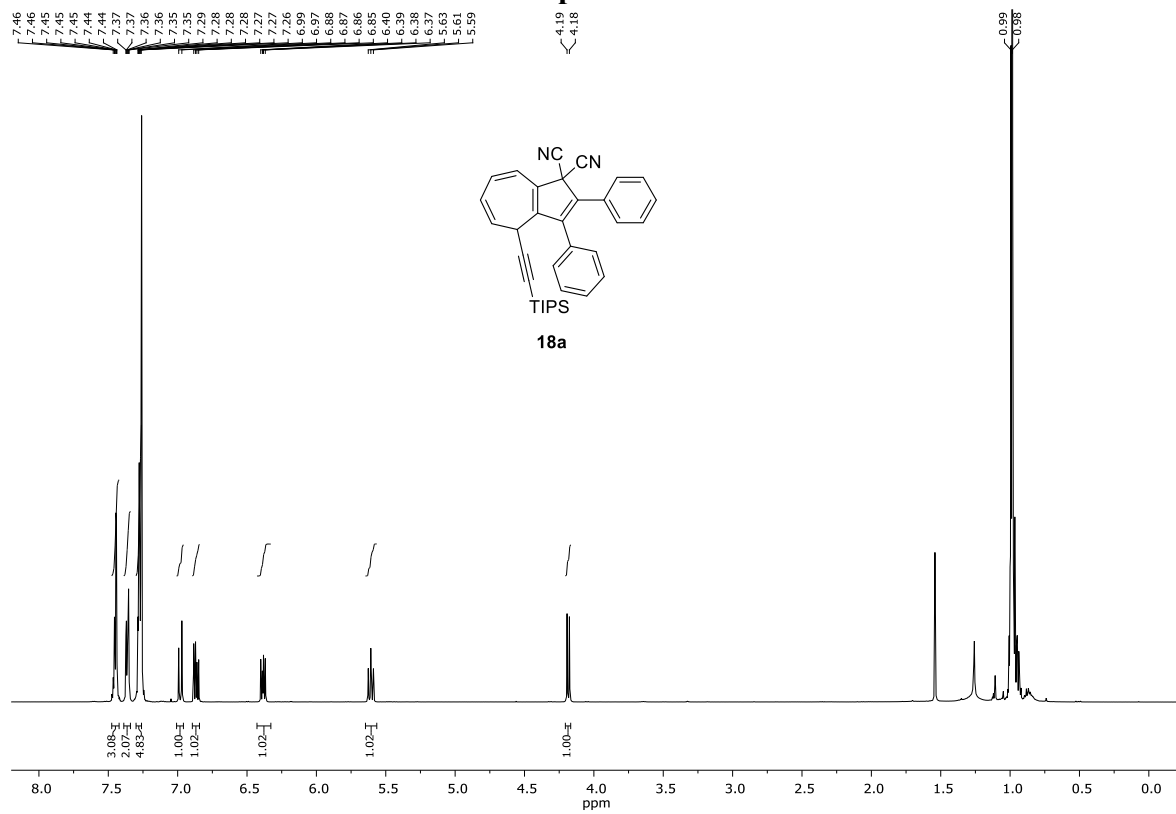

$^1\text{H}$  NMR (500 MHz) spectrum of **18a** in  $\text{CDCl}_3$

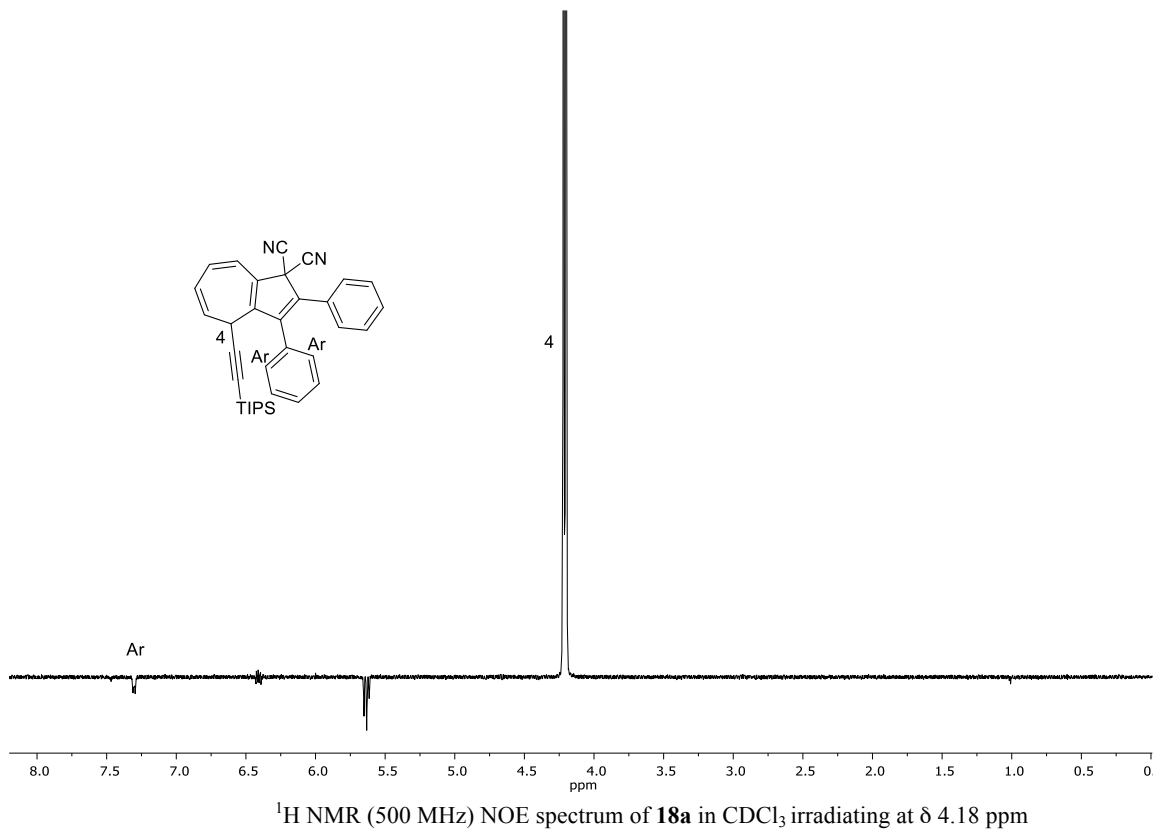

$^1\text{H}$  NMR (500 MHz) NOE spectrum of **18a** in  $\text{CDCl}_3$  irradiating at  $\delta$  4.18 ppm



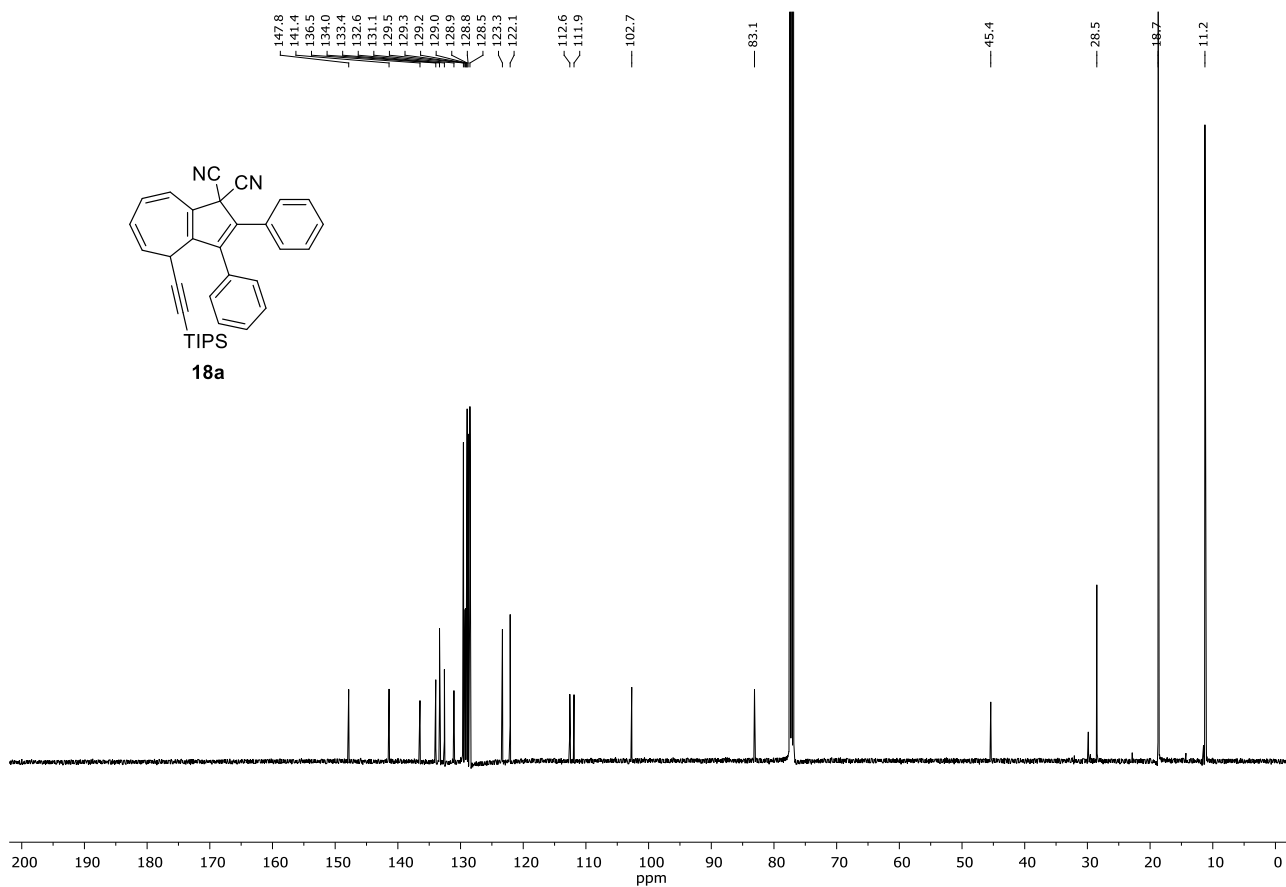

$^{13}\text{C}$  NMR (125 MHz) spectrum of **18a** in  $\text{CDCl}_3$

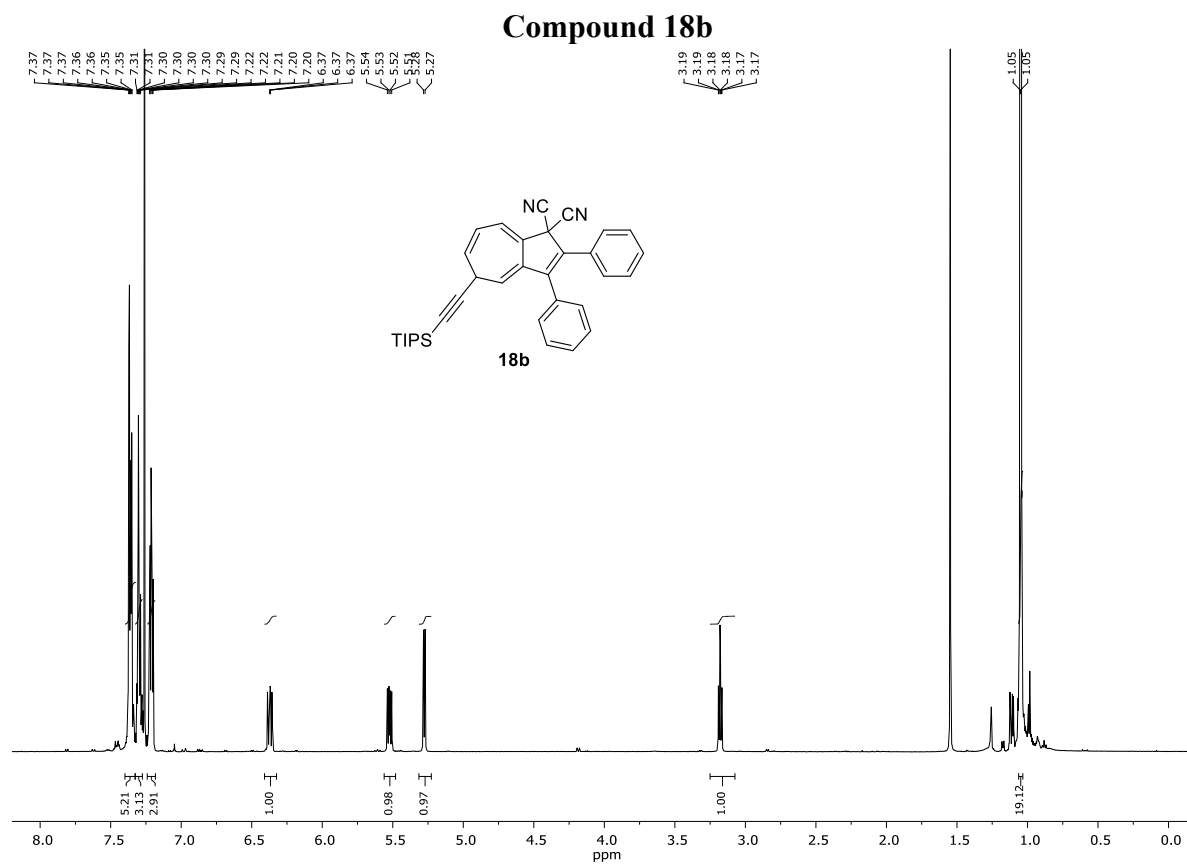

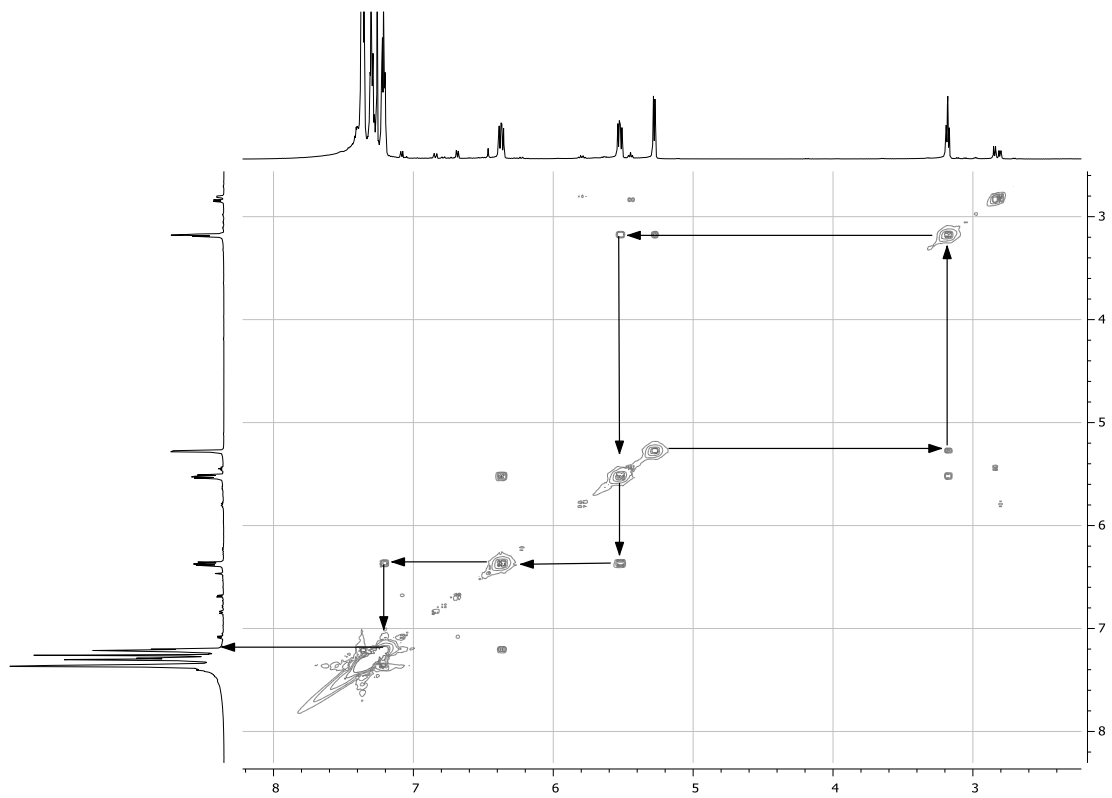

COSY spectrum (500 MHz) of **18b** in  $\text{CDCl}_3$

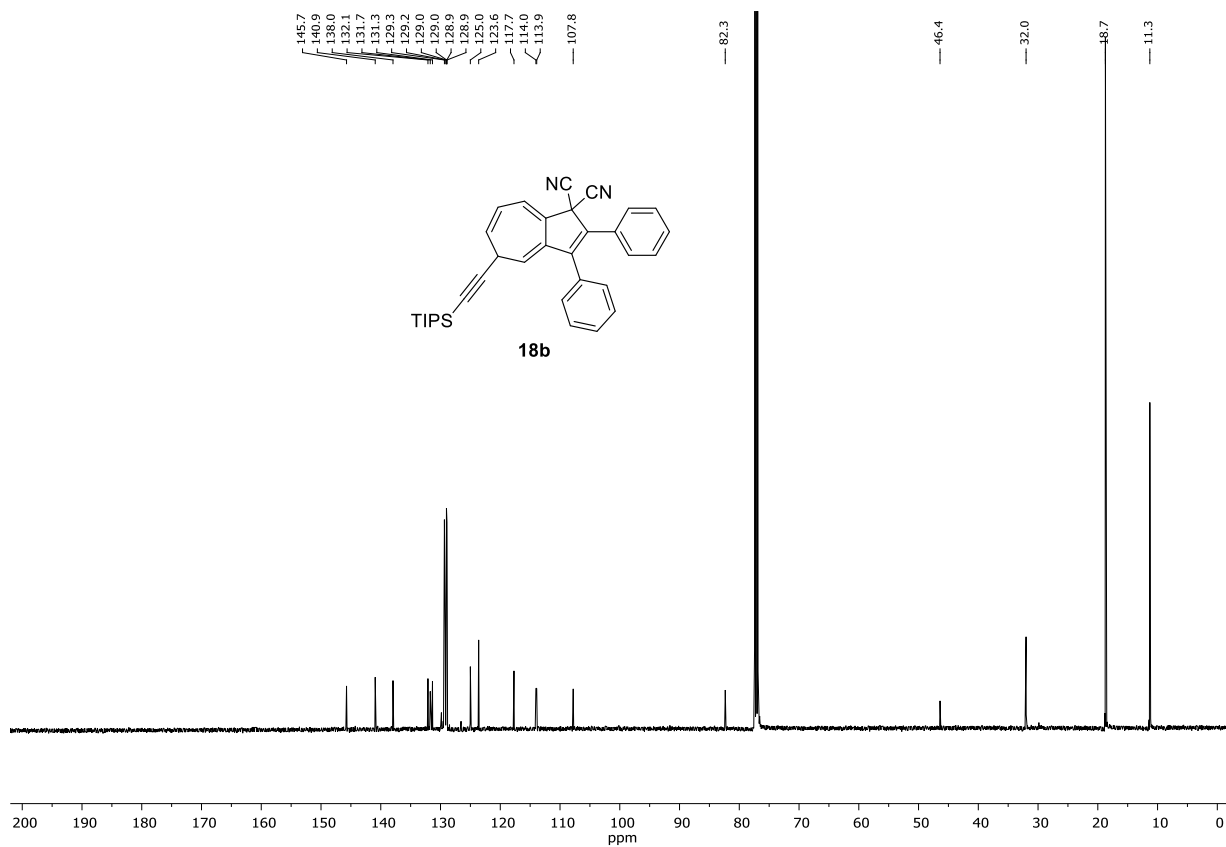

$^{13}\text{C}$  NMR (125 MHz) spectrum of **18b** in  $\text{CDCl}_3$ .

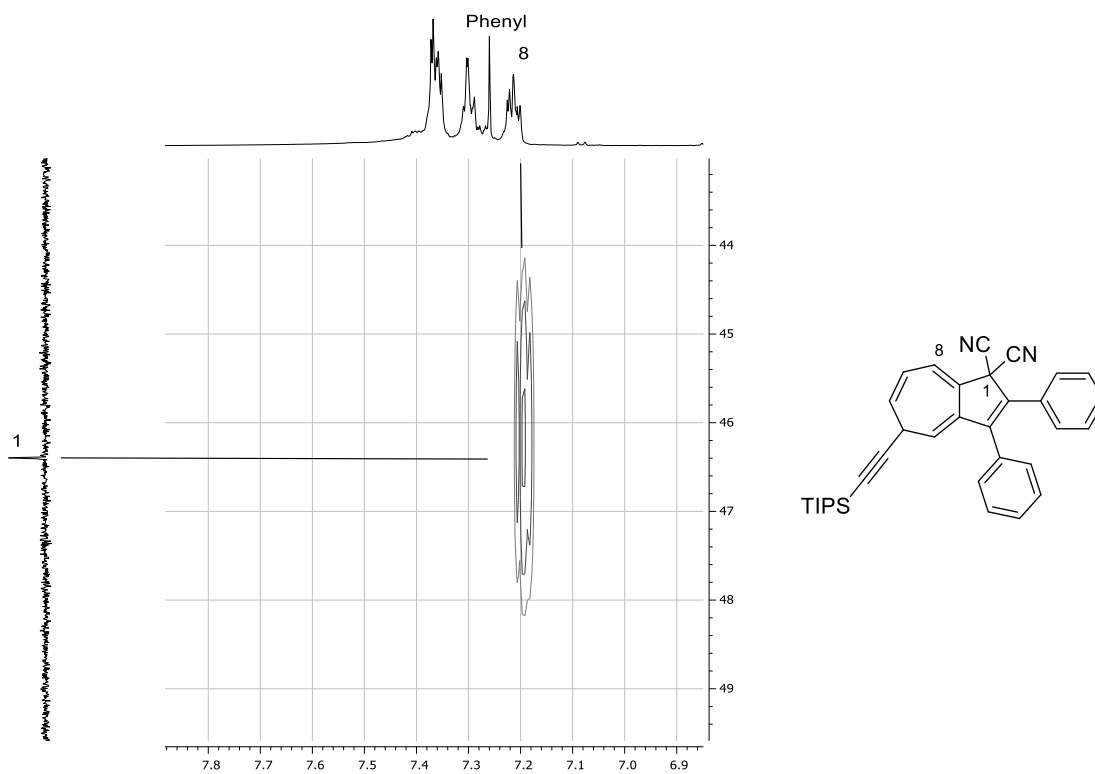

HMBC spectrum (500 MHz / 125 MHz) of **18b** in  $\text{CDCl}_3$ .

### Compound 18c

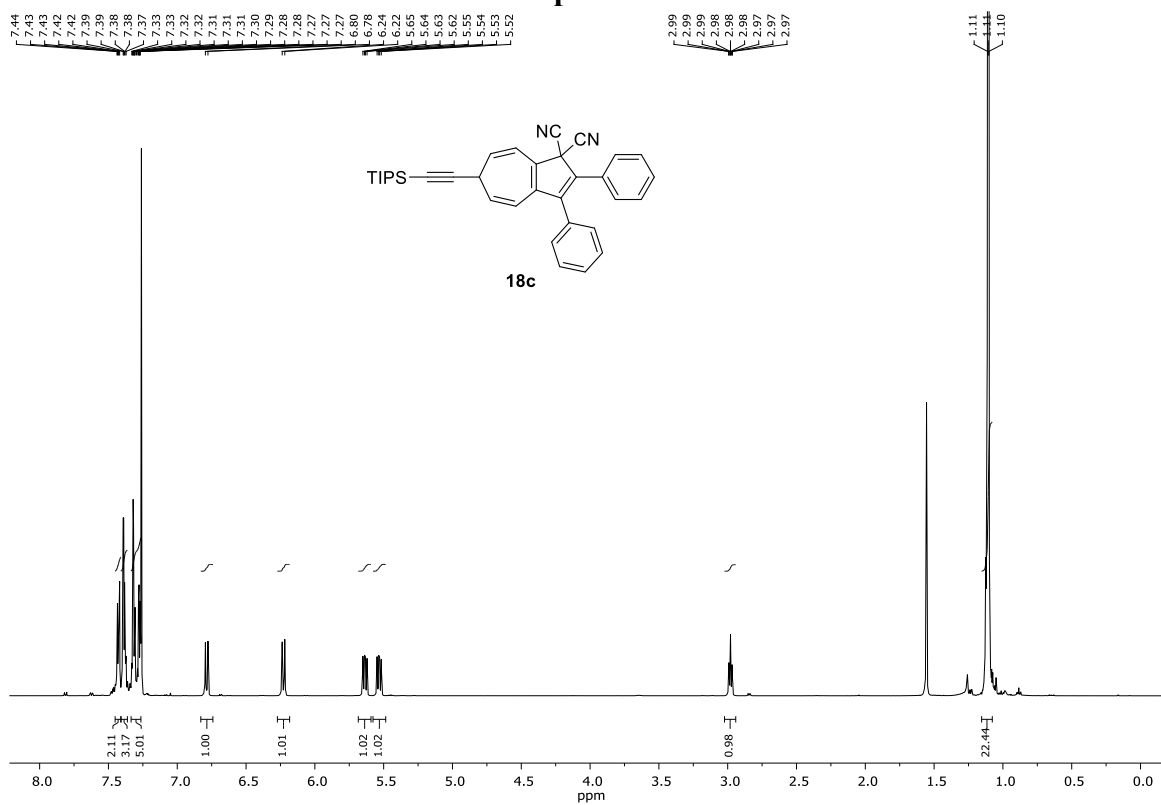

<sup>1</sup>H NMR (500 MHz) spectrum of **18c** in CDCl<sub>3</sub>

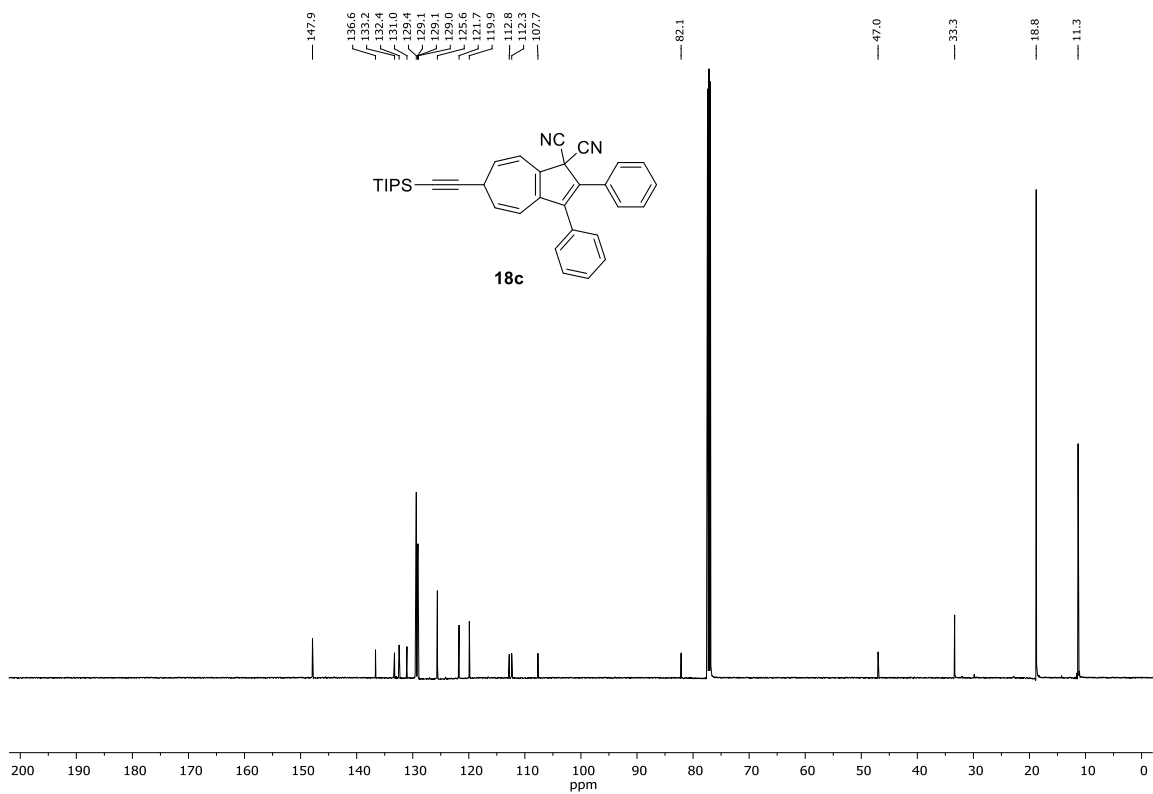

<sup>13</sup>C NMR (125 MHz) spectrum of **18c** in CDCl<sub>3</sub>

### Compound 18d

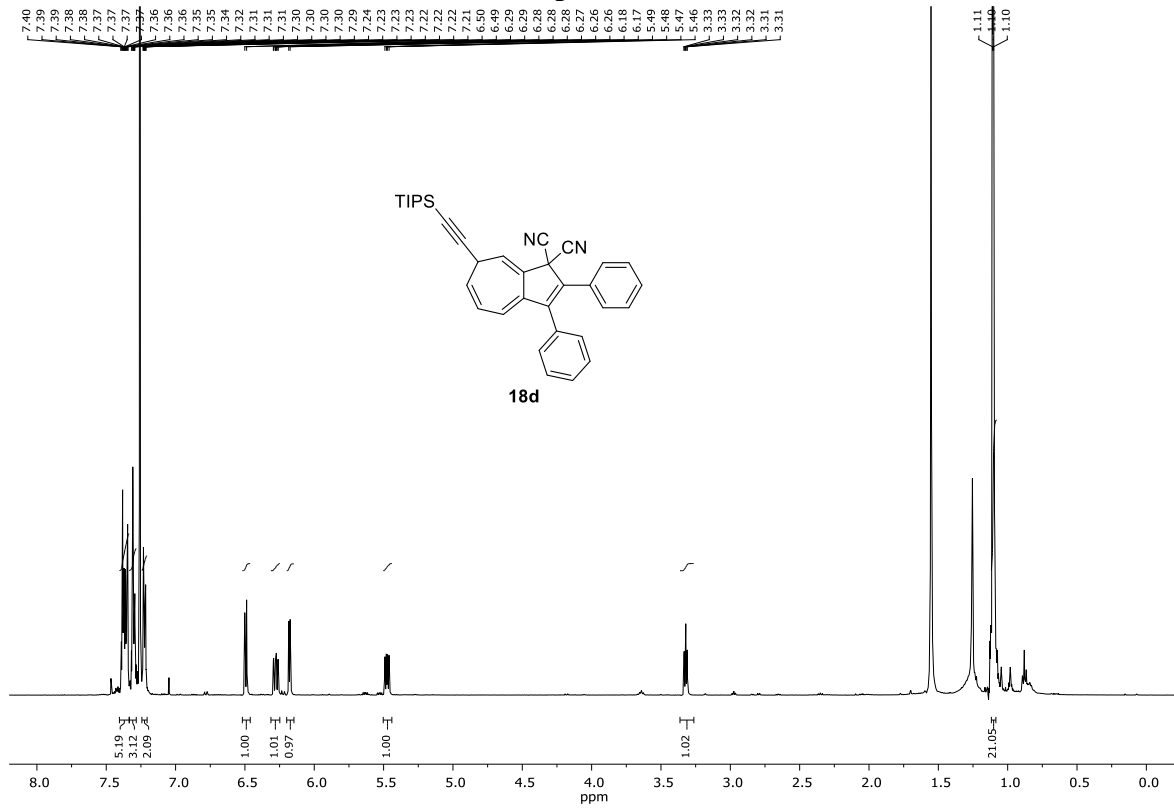

<sup>1</sup>H NMR (500 MHz) spectrum of **18d** in CDCl<sub>3</sub>

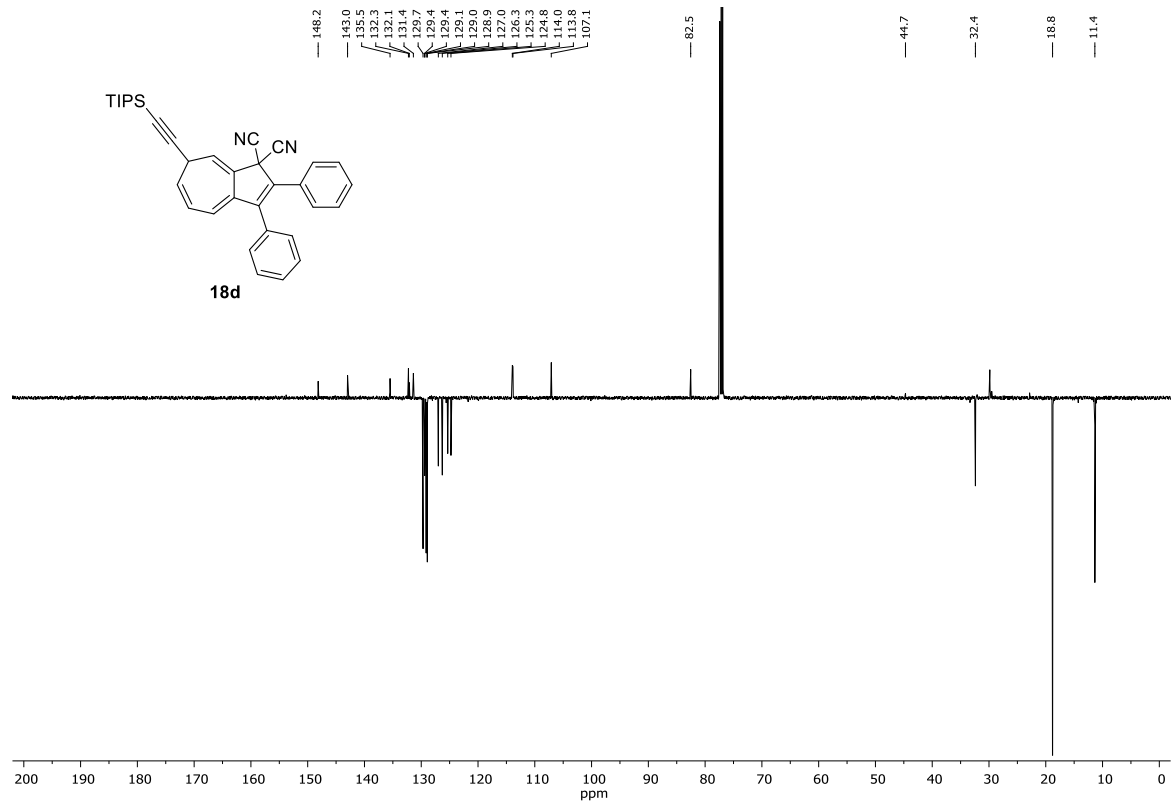

<sup>13</sup>C NMR APT (125 MHz) spectrum of **18d** in CDCl<sub>3</sub>

### Compound 18e

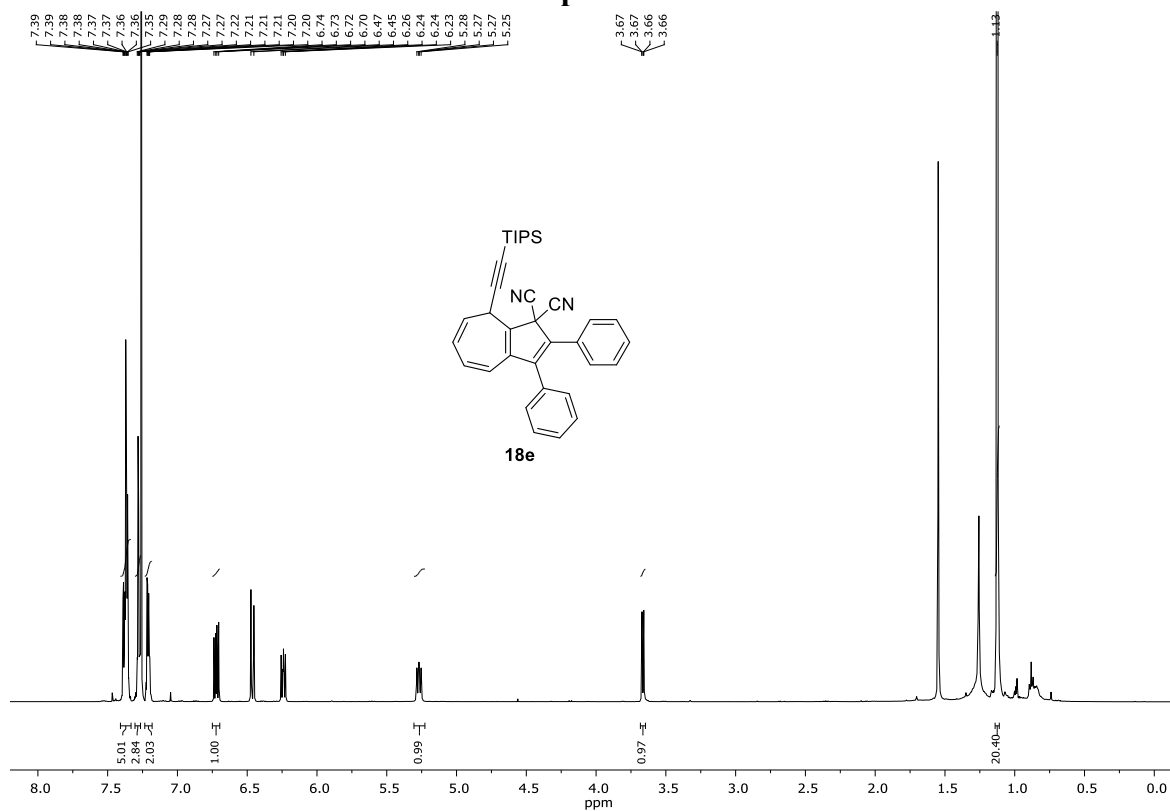

$^1\text{H}$  NMR (500 MHz) spectrum of **18e** in  $\text{CDCl}_3$

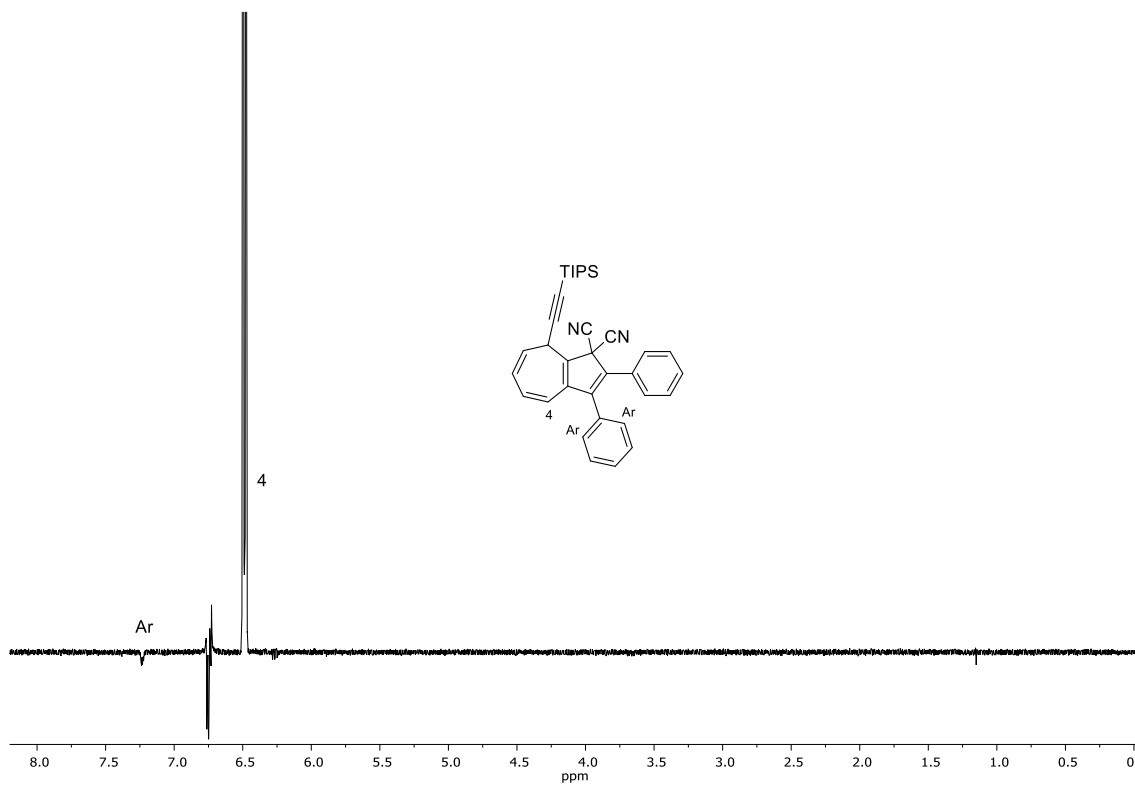

$^1\text{H}$  NMR (500 MHz) NOE spectrum of **18e** in  $\text{CDCl}_3$  irradiating at  $\delta$  6.46 ppm

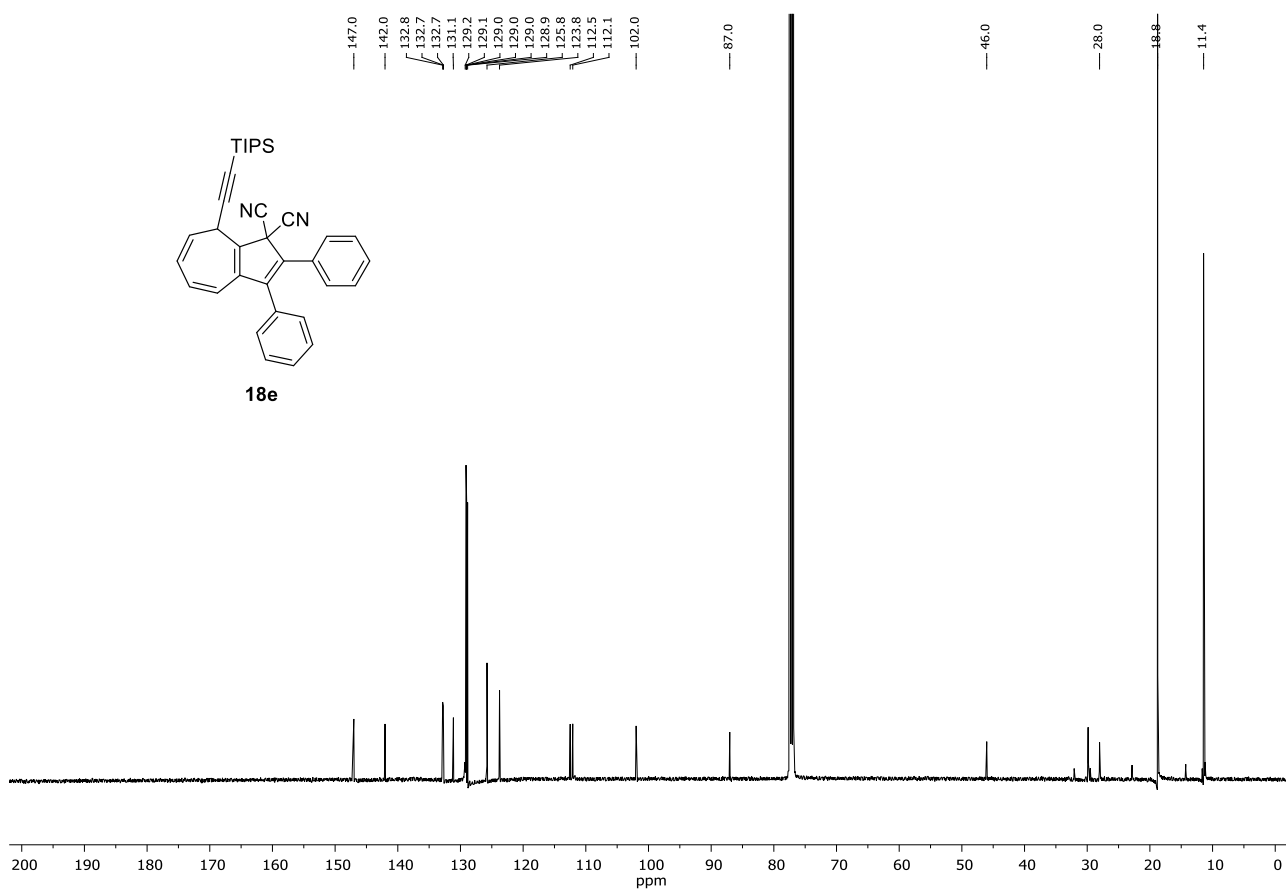

$^{13}\text{C}$  NMR (125 MHz) spectrum of **18e** in  $\text{CDCl}_3$



Regioisomeric mixture **19** and **20** (Table 3 Entry 5)

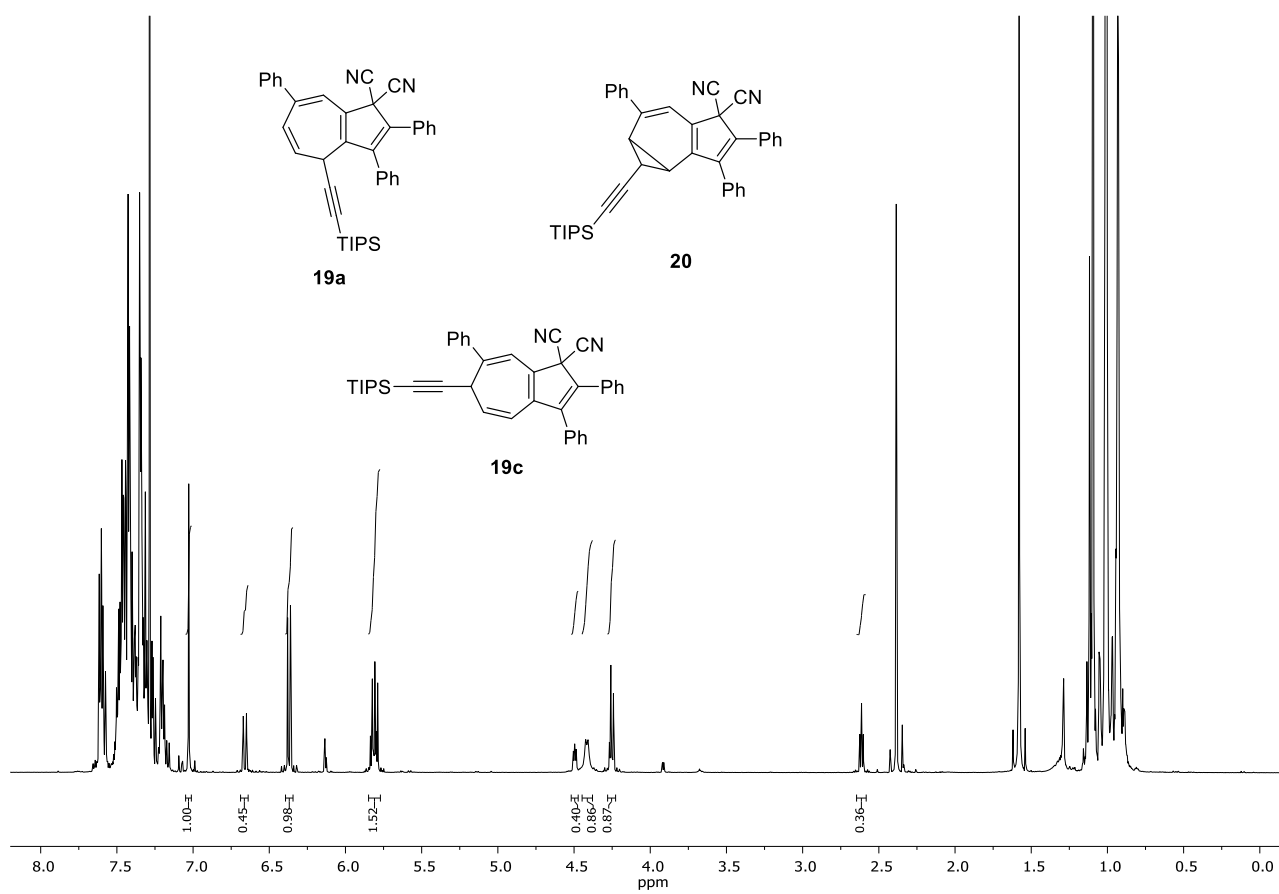

<sup>1</sup>H NMR (500 MHz) spectrum of mixture of **19** and **20** in CDCl<sub>3</sub>

### Compound 19a

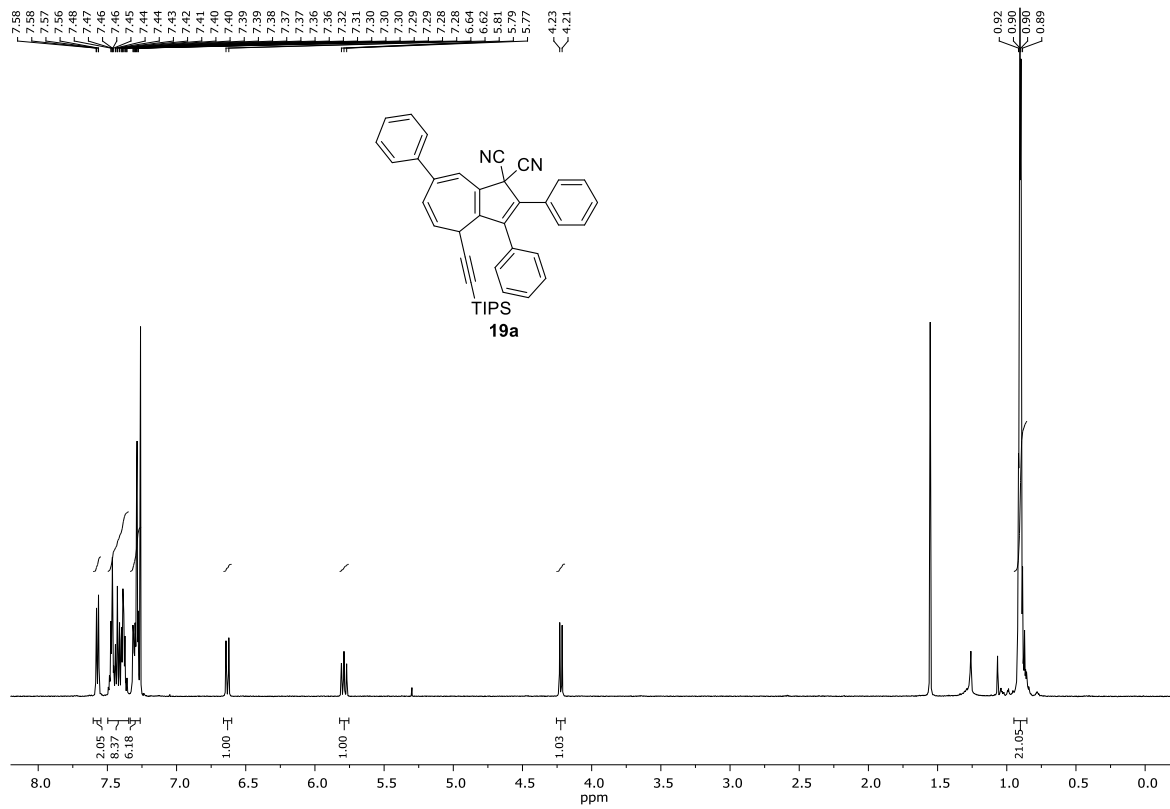

<sup>1</sup>H NMR (500 MHz) spectrum of 19a in CDCl<sub>3</sub>

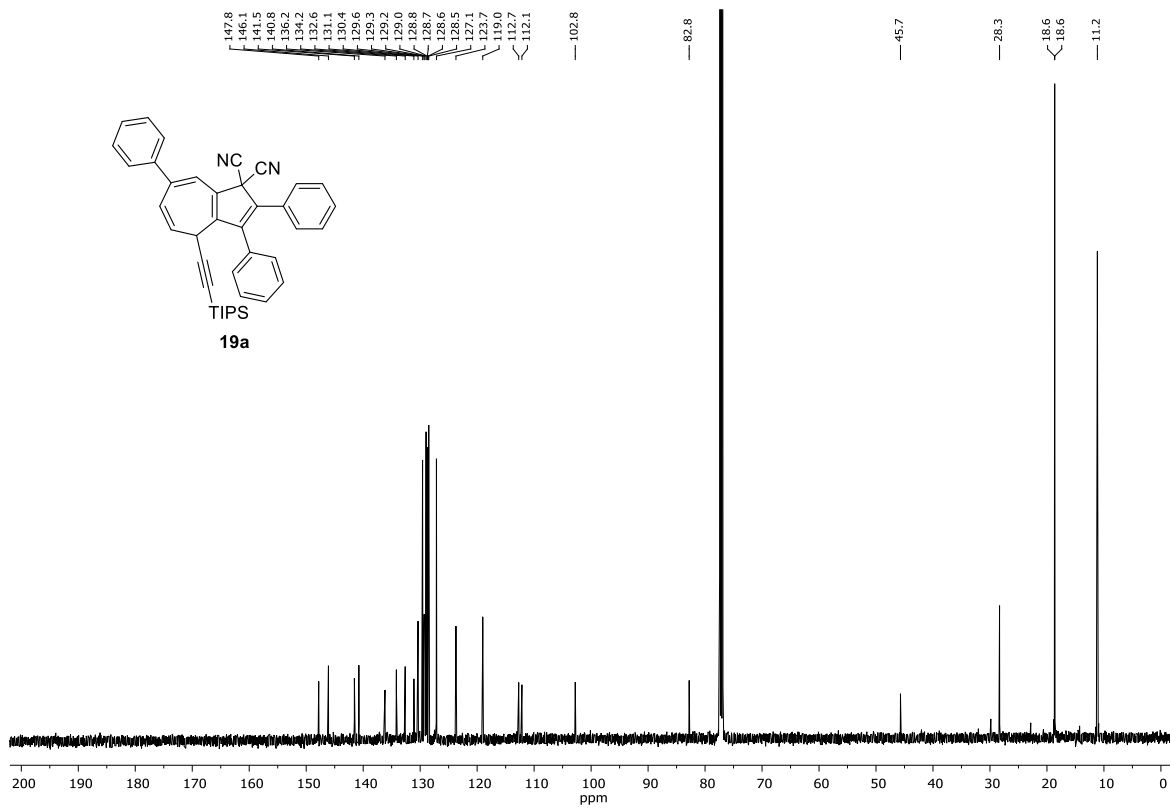

<sup>13</sup>C NMR (125 MHz) spectrum of 19a in CDCl<sub>3</sub>

### Compound 19c

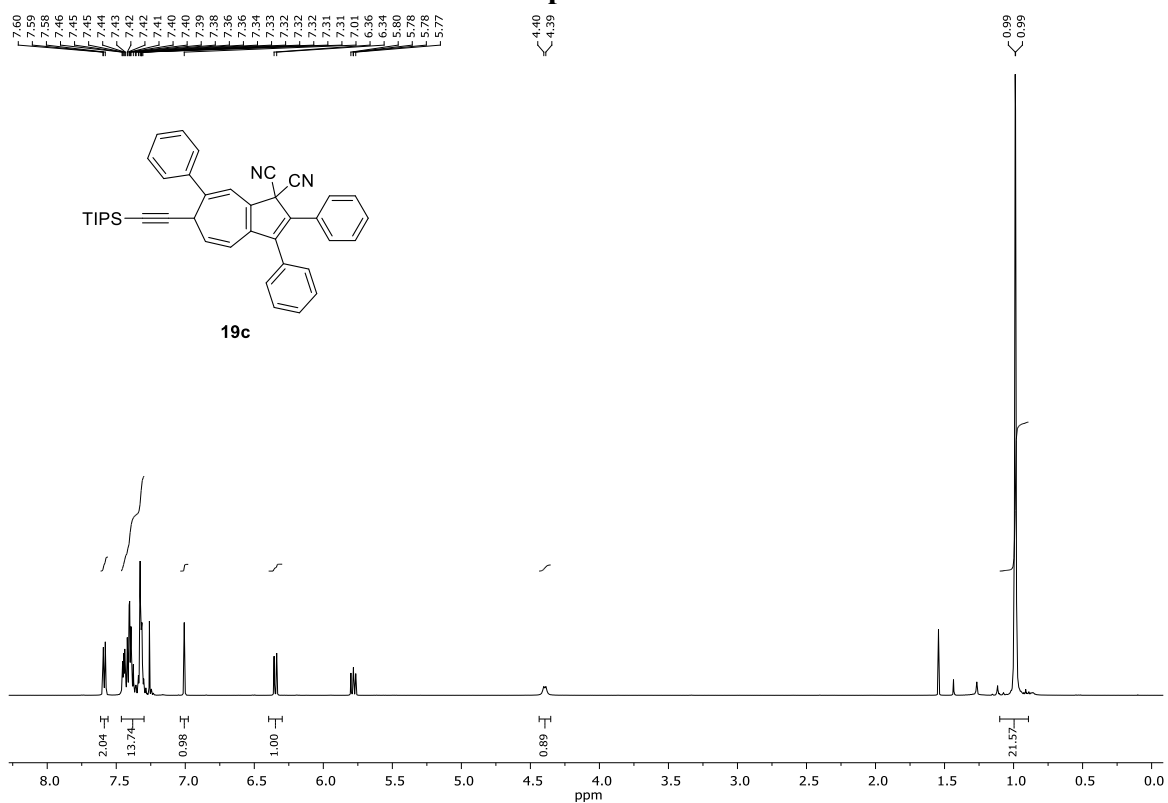

**<sup>1</sup>H NMR (500 MHz) spectrum of 19c in CDCl<sub>3</sub>. (Contains some residual chlorobenzene from chromatography)**

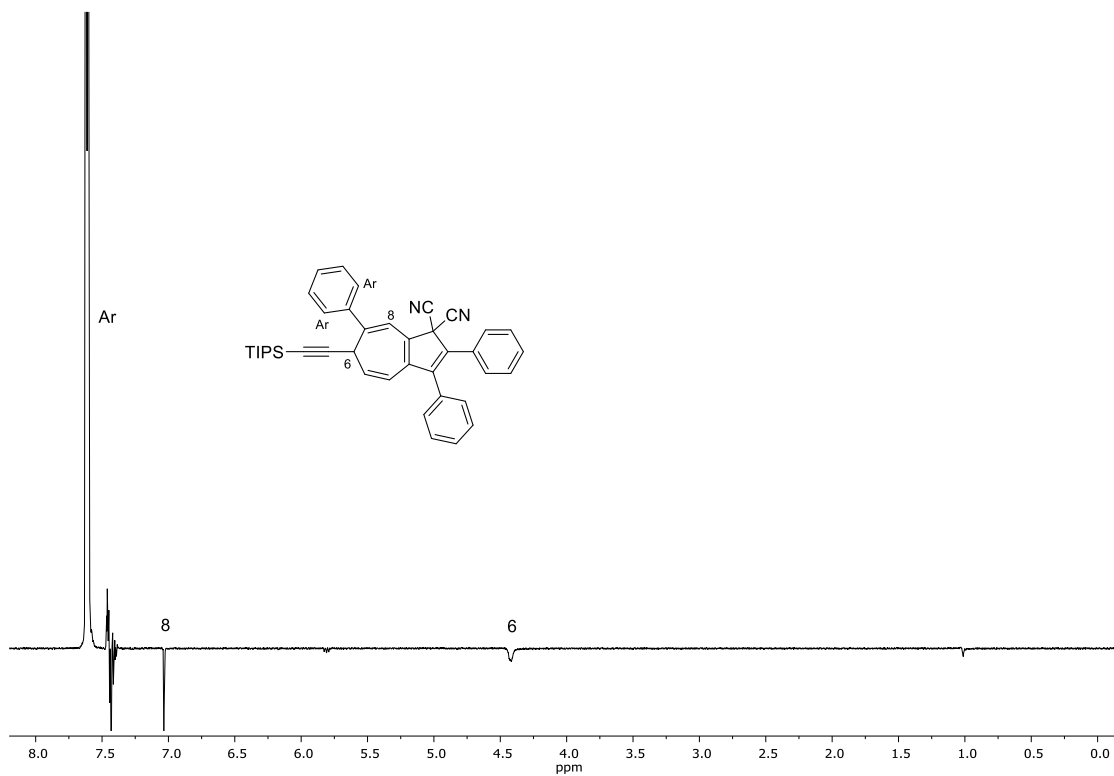

**<sup>1</sup>H NMR (500 MHz) NOE spectrum of 19c in CDCl<sub>3</sub> irradiating at δ 7.59 ppm**

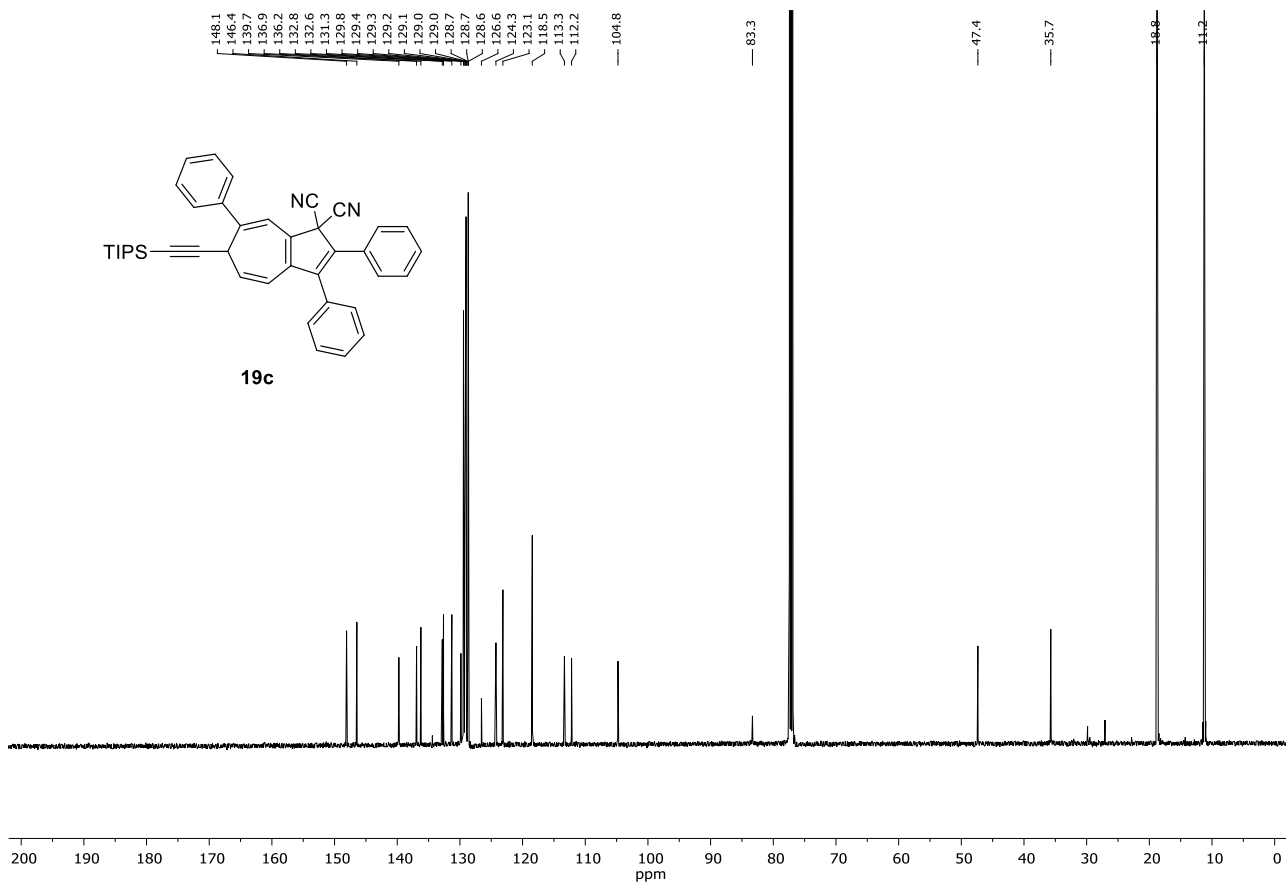

### Compound 20

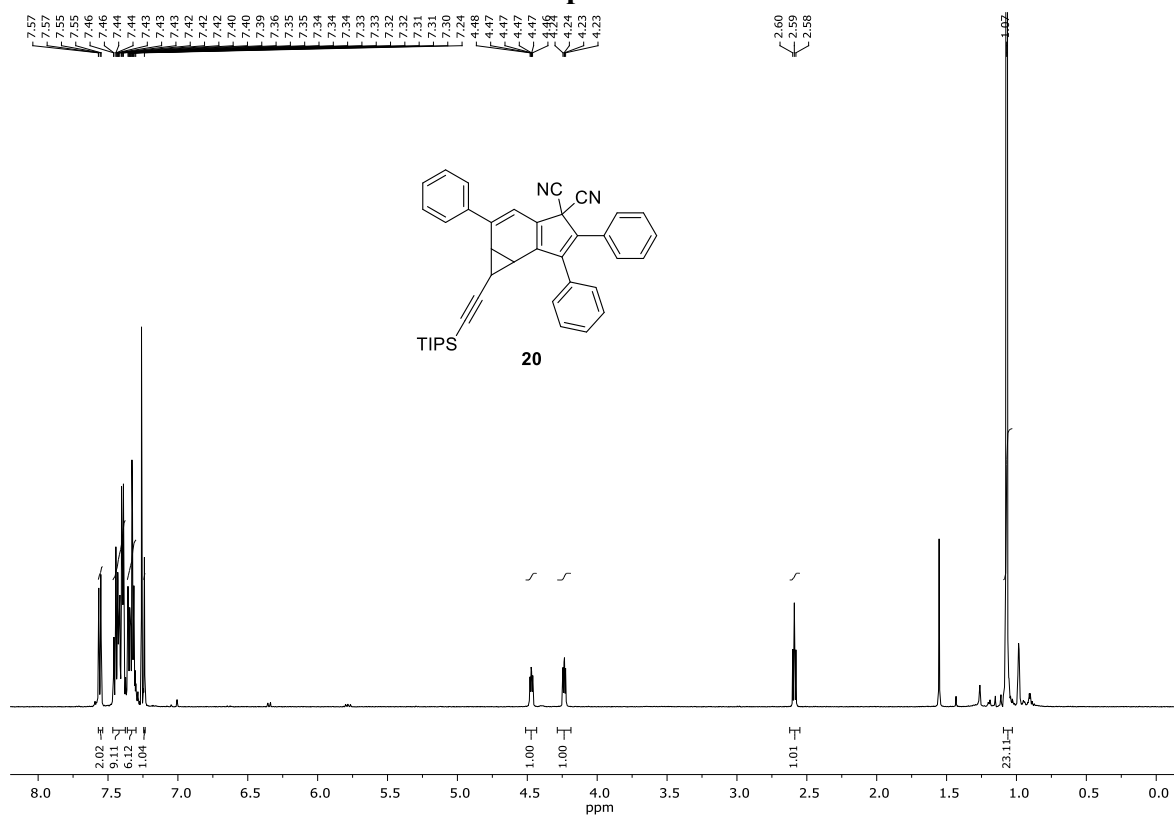

<sup>1</sup>H NMR (500 MHz) spectrum of **20** in CDCl<sub>3</sub>

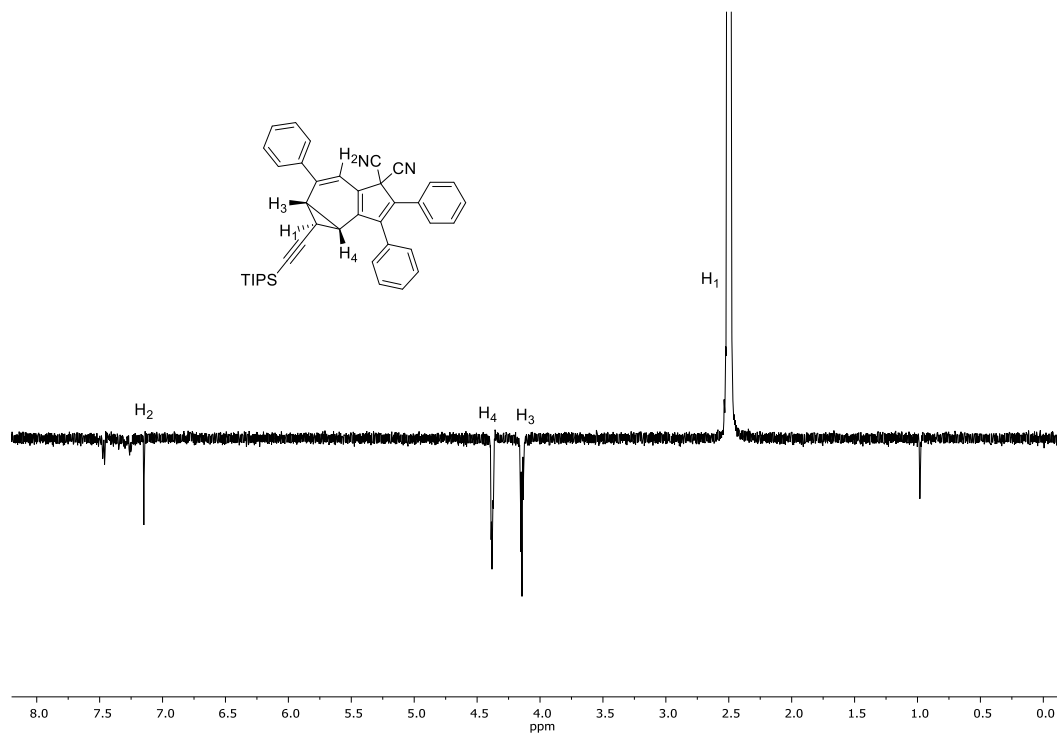

<sup>1</sup>H NMR (500 MHz) NOE spectrum of **20** in CDCl<sub>3</sub> irradiating at δ 2.59 ppm

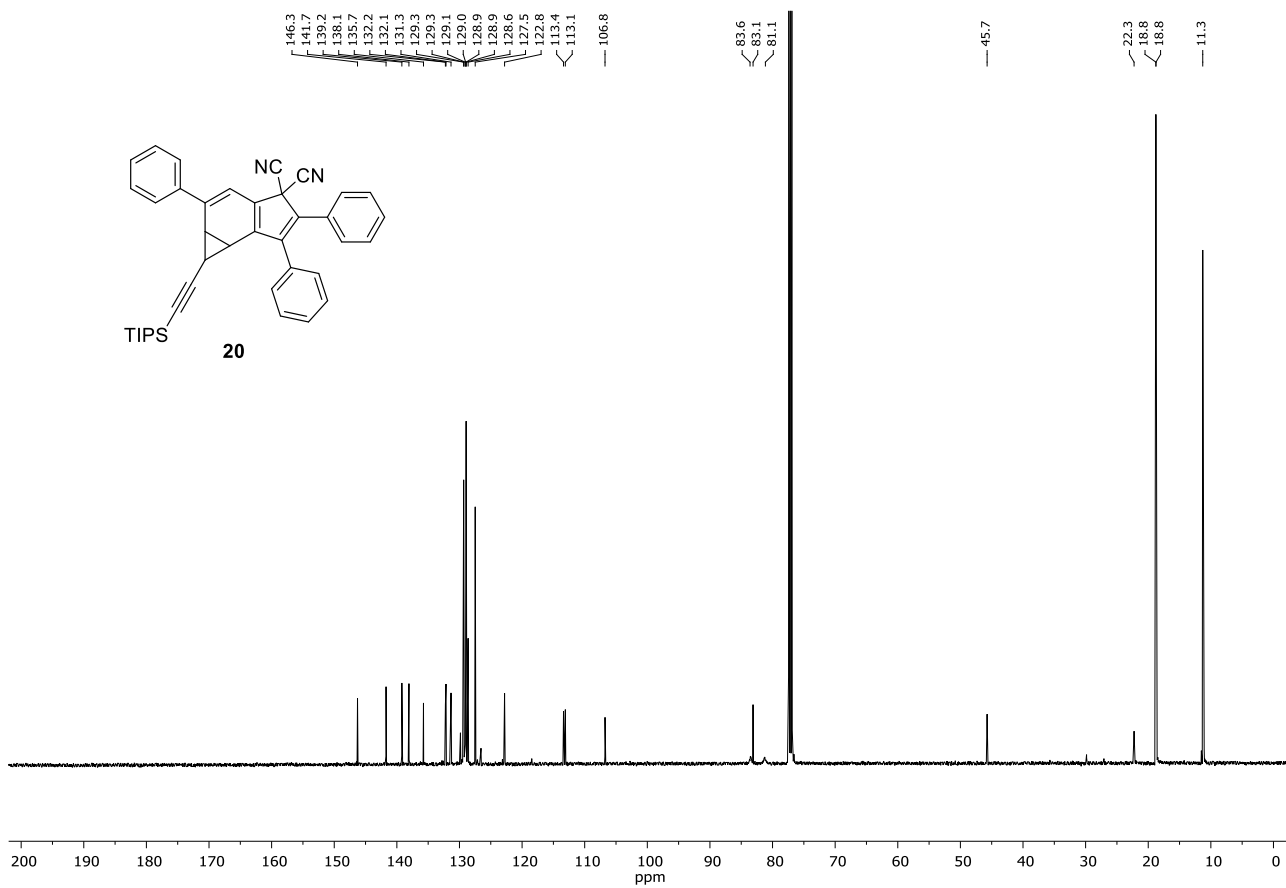

$^{13}\text{C}$  NMR (125 MHz) spectrum of **20** in  $\text{CDCl}_3$

# Compound 21

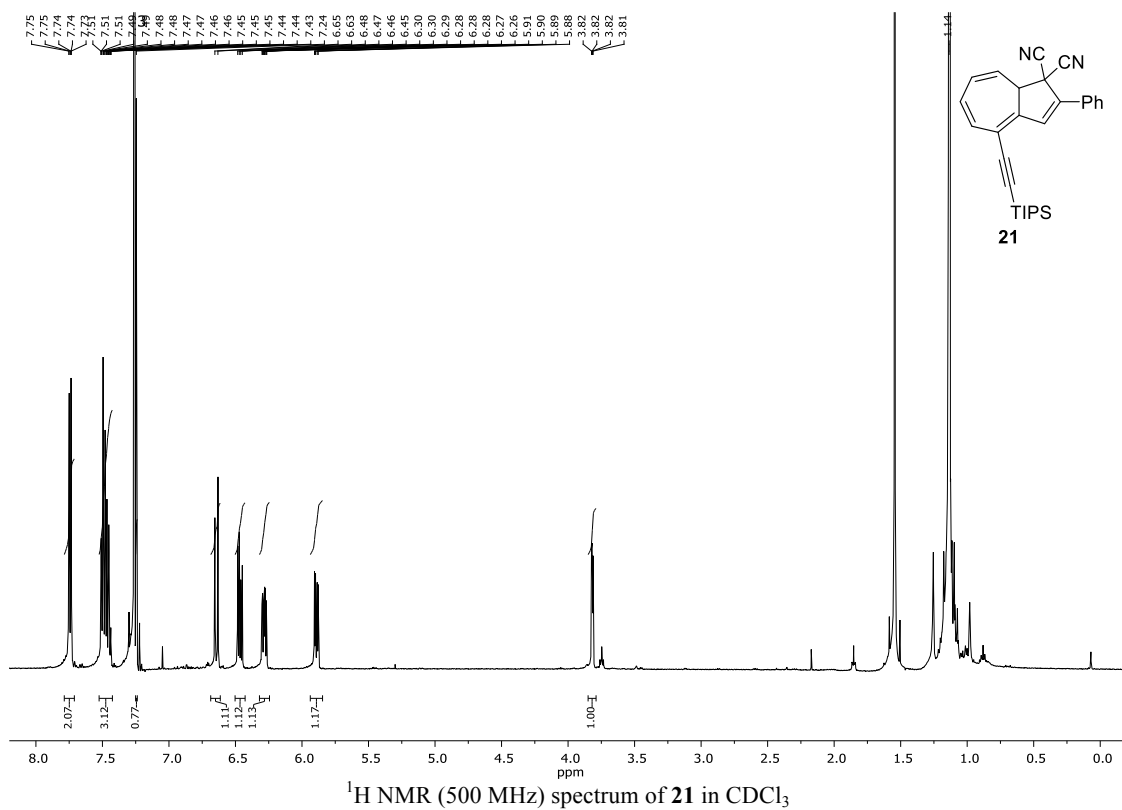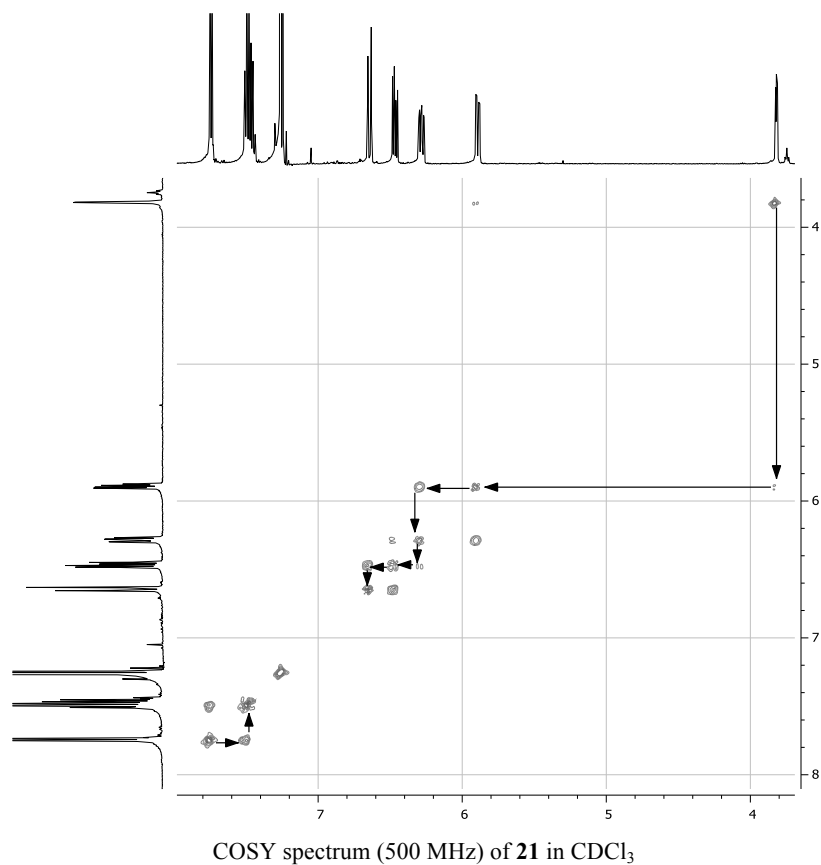

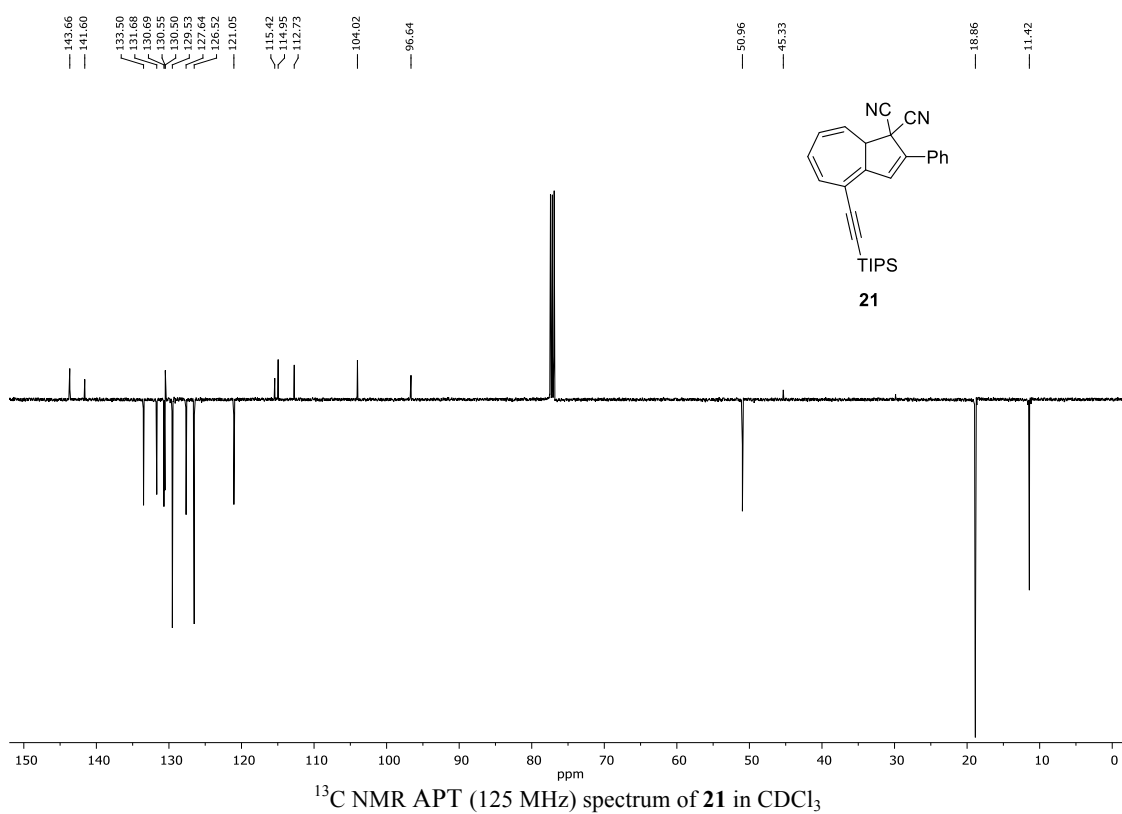



# Compound 22

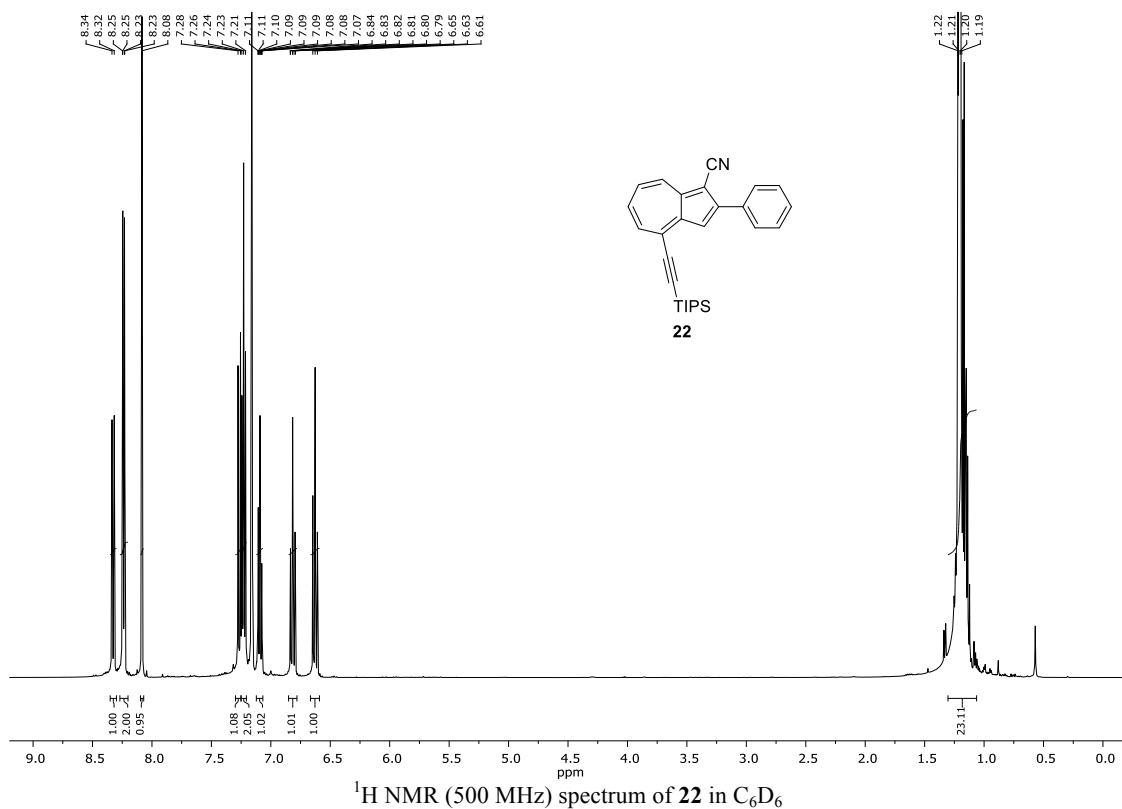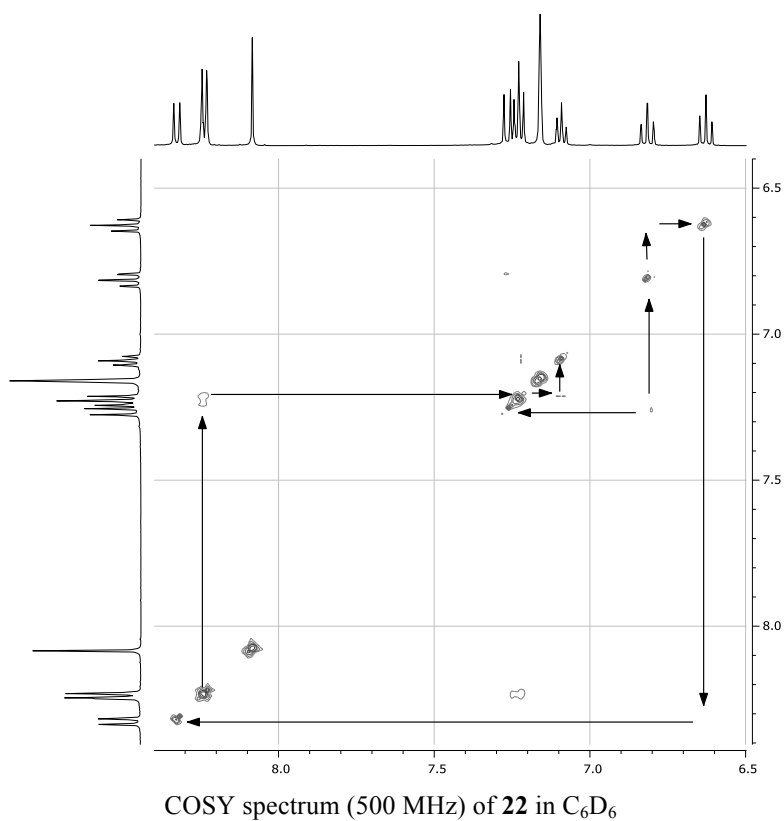

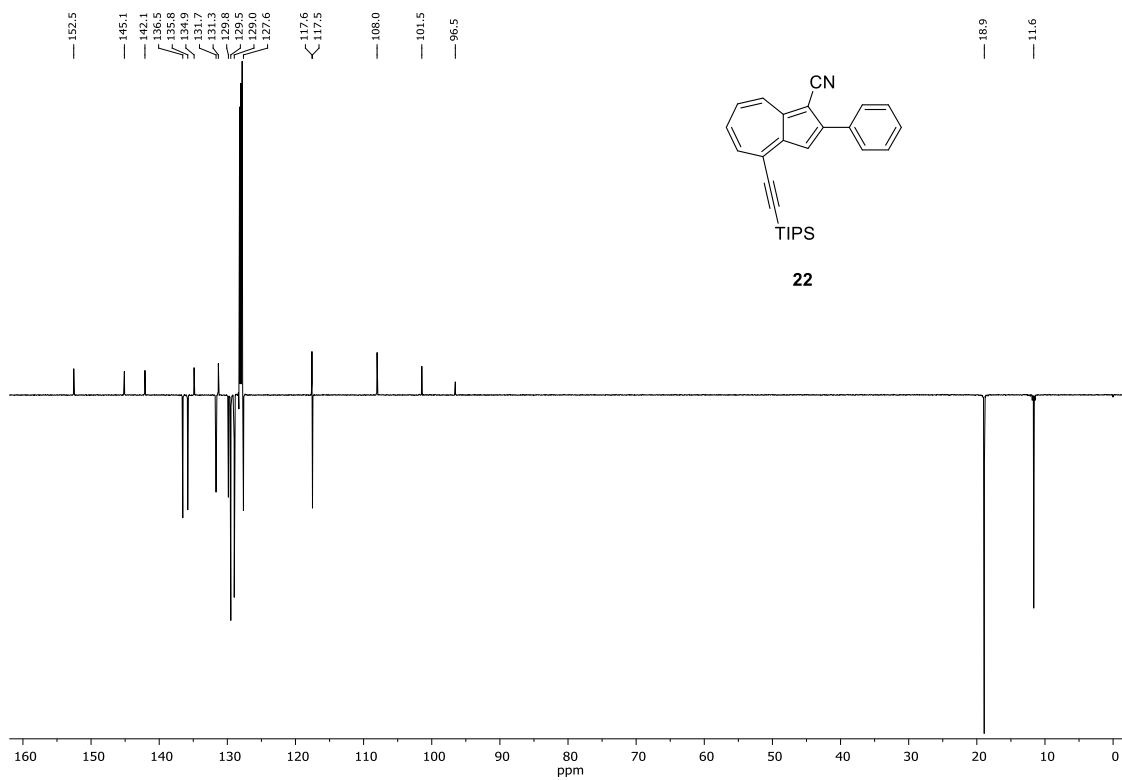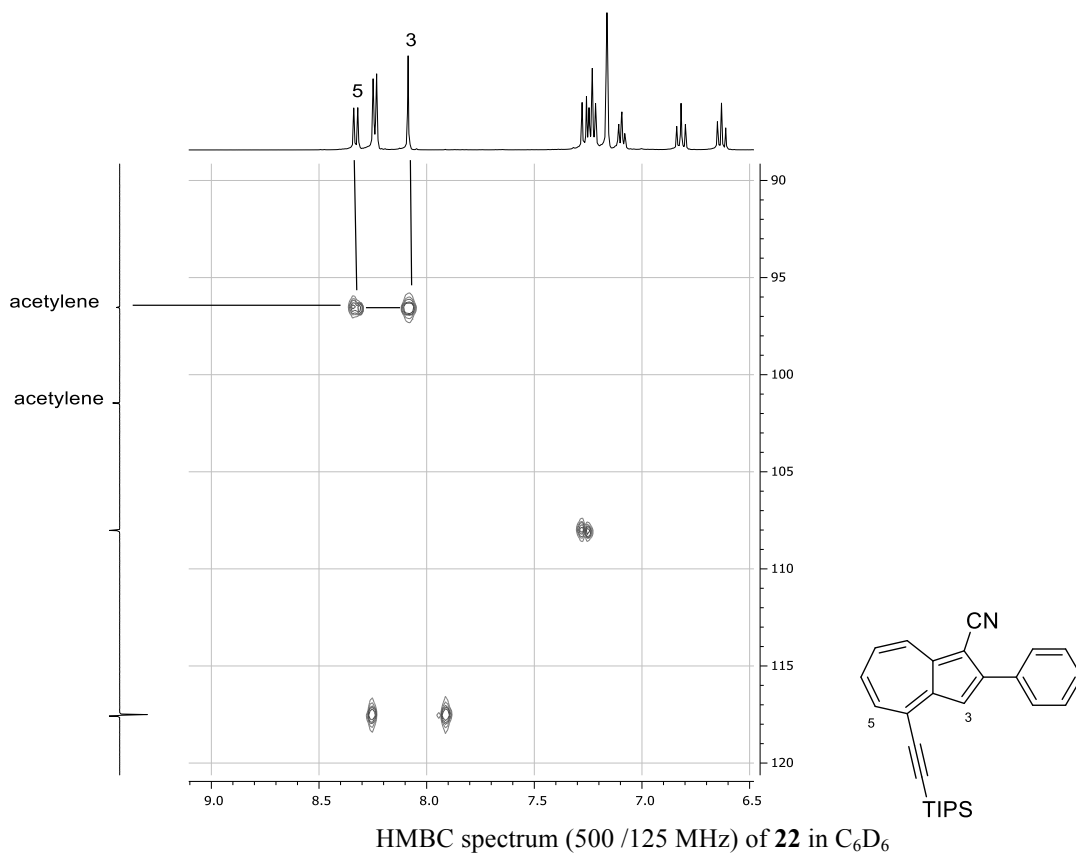

# Compound 23

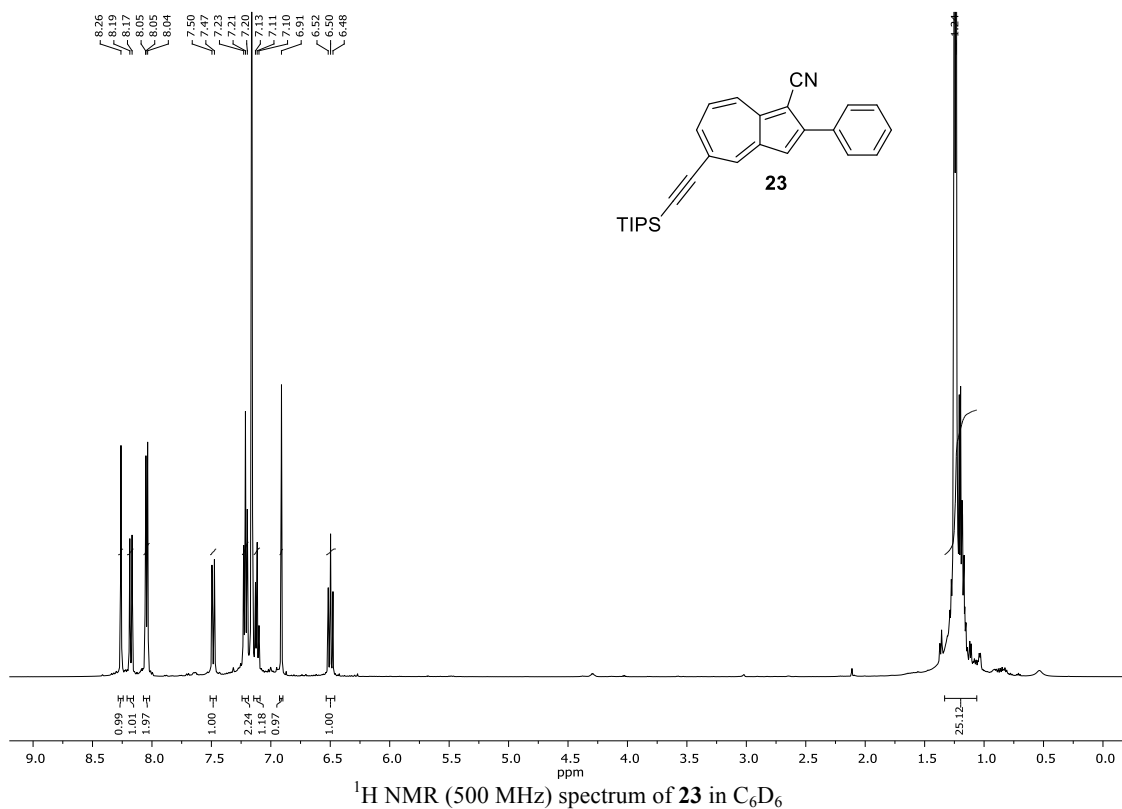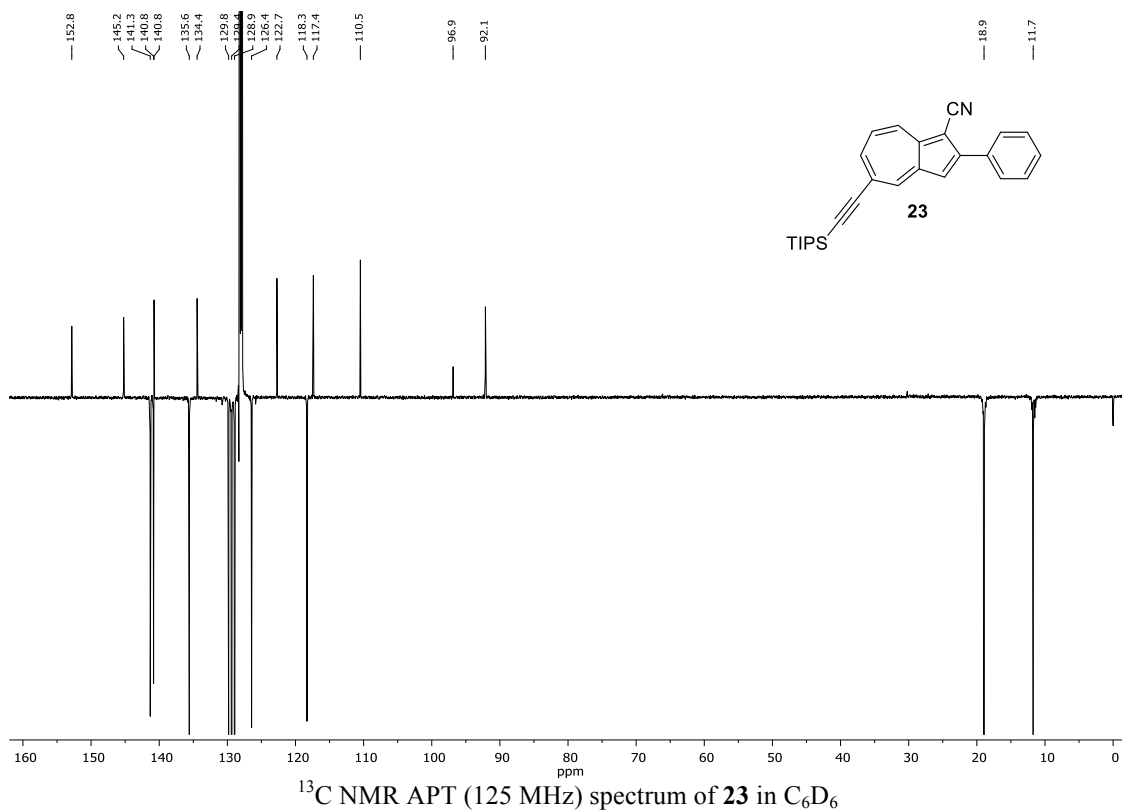

## UV-Vis Absorption Spectra

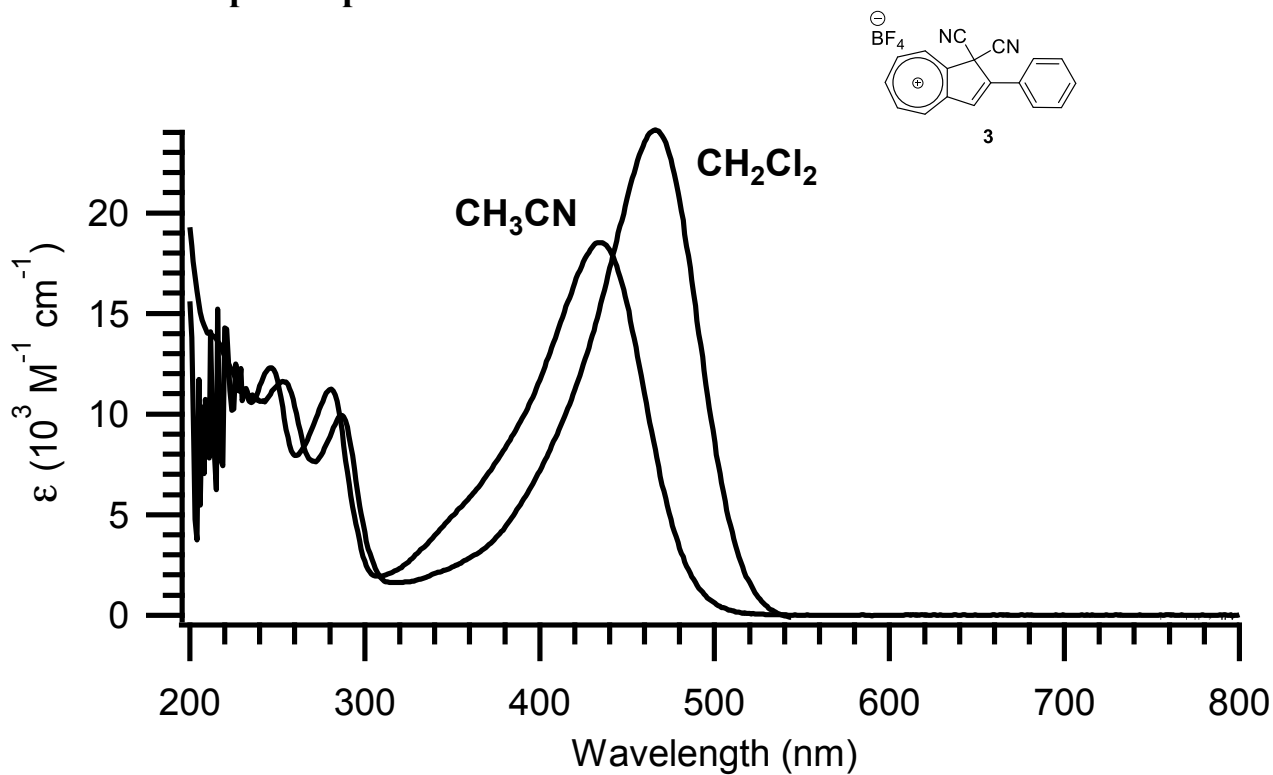

UV-Vis absorption spectra of compound 3.

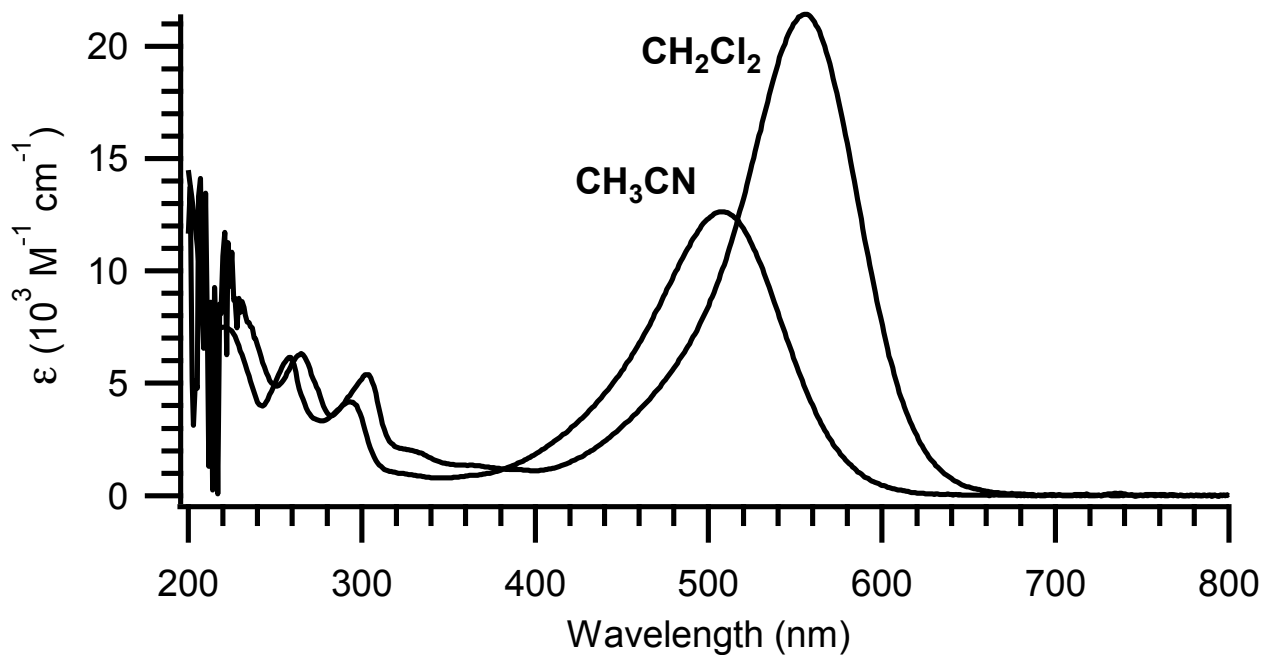

UV-Vis absorption spectra of compound 4.

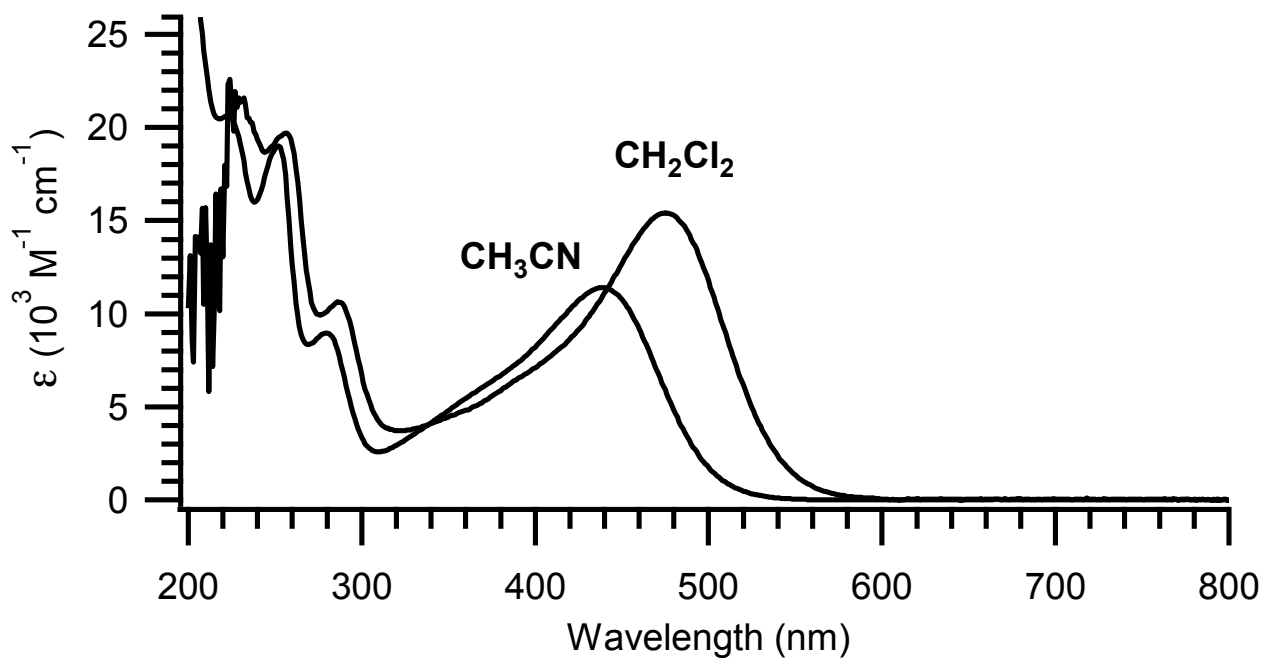

UV-Vis absorption spectra of compound 5.

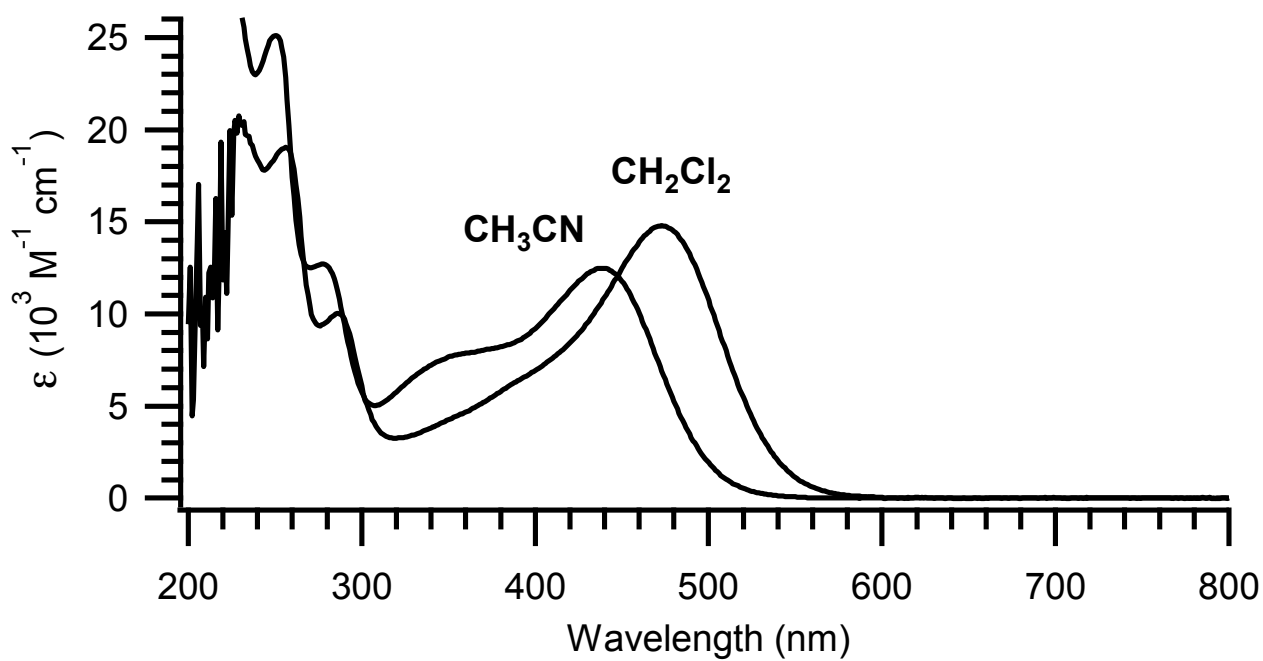

UV-Vis absorption spectra of compound 6.

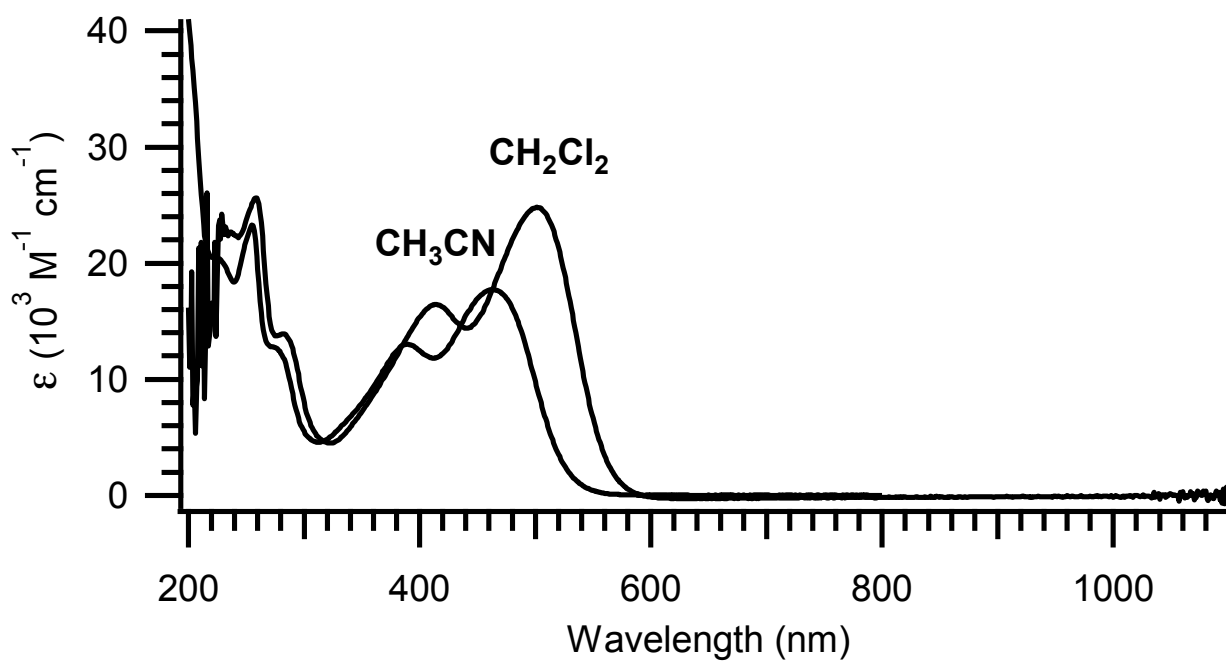

UV-Vis absorption spectra of compound 7.

## Computational Data

Free energy differences (kJ/mol) between DHA **21** and **25** in MeCN:

|        |      |
|--------|------|
| CAM    | 38.8 |
| M06-2X | 30.6 |
| PBE0   | 35.7 |

Free energy differences (kJ/mol) of *s-cis* and *s-trans* conformers of *E/Z*-VHFs **24** and **26** in MeCN:

*E-24* (*s-cis* vs *s-trans*)

|        |      |
|--------|------|
| CAM    | -2.9 |
| M06-2X | -3.7 |
| PBE0   | -4.1 |

*Z-24* (*s-cis* vs *s-trans*)

|        |      |
|--------|------|
| CAM    | -2.9 |
| M06-2X | -5.0 |
| PBE0   | -5.8 |

*E-26* (*s-cis* vs *s-trans*)

|        |       |
|--------|-------|
| CAM    | -11.5 |
| M06-2X | -14.8 |
| PBE0   | -13.0 |

*Z-26* (*s-cis* vs *s-trans*)

|        |       |
|--------|-------|
| CAM    | -9.5  |
| M06-2X | -10.8 |
| PBE0   | -10.5 |

Geometries of *E/Z*-VHF<sub>s</sub> 24 and 26 (*s-cis/s-trans*):

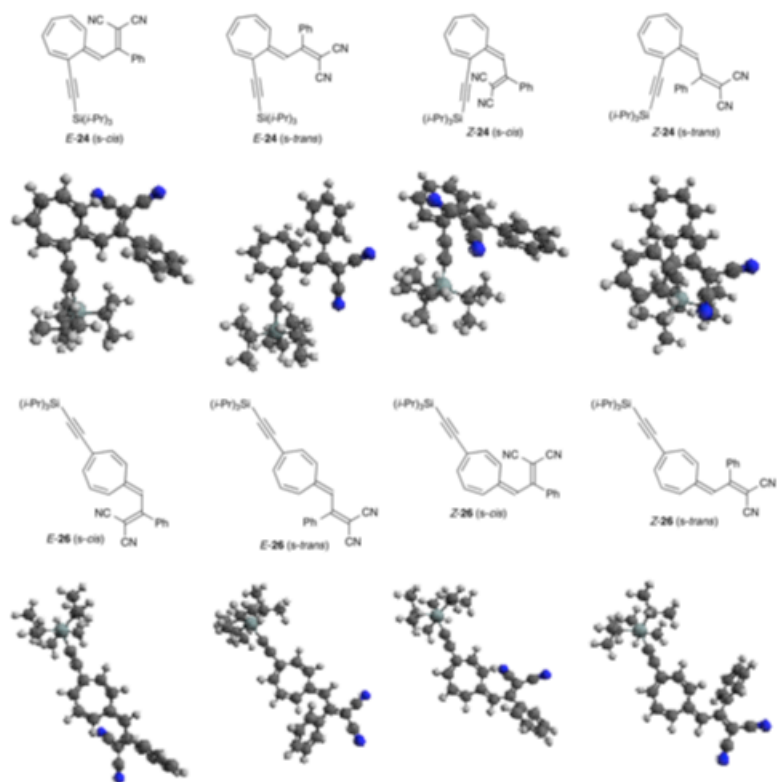



## Coordinates at the CAM-B3LYP/6-311+G(d) level of theory

### Compound 21

|    |          |          |          |
|----|----------|----------|----------|
| C  | -0.77843 | -4.37996 | -0.28981 |
| C  | 0.06920  | -3.46646 | 0.22930  |
| C  | -0.05403 | -2.01852 | 0.11965  |
| C  | -1.97160 | -4.09760 | -1.06359 |
| C  | -1.25141 | -1.38358 | 0.06312  |
| C  | -2.77565 | -3.04275 | -0.89371 |
| C  | -2.56244 | -2.09919 | 0.25911  |
| H  | -0.48415 | -5.42278 | -0.22129 |
| H  | 0.99132  | -3.82739 | 0.67301  |
| H  | -3.59967 | -2.87779 | -1.57800 |
| C  | -1.50389 | 0.02232  | -0.12372 |
| H  | -0.71526 | 0.72975  | -0.34070 |
| C  | -2.79790 | 0.34730  | 0.02056  |
| C  | -3.60072 | -0.91688 | 0.40635  |
| H  | -2.54320 | -2.67881 | 1.18578  |
| C  | -4.03388 | -0.84142 | 1.81304  |
| C  | -4.79362 | -1.08109 | -0.43662 |
| N  | -4.33343 | -0.79473 | 2.91835  |
| N  | -5.71229 | -1.20744 | -1.10957 |
| H  | -2.21433 | -4.80644 | -1.84972 |
| C  | -3.41014 | 1.67083  | -0.13720 |
| C  | -2.73402 | 2.66744  | -0.85396 |
| C  | -4.65863 | 1.98243  | 0.40957  |
| C  | -3.27886 | 3.93145  | -0.99954 |
| H  | -1.78036 | 2.44723  | -1.31807 |
| C  | -5.20389 | 3.25020  | 0.26148  |
| H  | -5.21980 | 1.24709  | 0.97232  |
| C  | -4.51687 | 4.23005  | -0.44024 |
| H  | -2.73915 | 4.68534  | -1.56099 |
| H  | -6.17083 | 3.46920  | 0.69926  |
| H  | -4.94470 | 5.21894  | -0.55776 |
| C  | 1.16066  | -1.26762 | 0.06260  |
| C  | 2.19619  | -0.64297 | 0.02069  |
| Si | 3.76648  | 0.33992  | -0.05212 |
| C  | 3.33194  | 2.07152  | 0.59900  |
| C  | 4.43416  | 3.11275  | 0.36829  |
| H  | 5.32310  | 2.90087  | 0.96758  |
| H  | 4.74838  | 3.16780  | -0.67644 |
| H  | 4.08545  | 4.10993  | 0.65512  |
| C  | 2.86398  | 2.09933  | 2.05814  |
| H  | 3.69002  | 1.91145  | 2.74788  |
| H  | 2.45369  | 3.08211  | 2.31121  |
| H  | 2.08797  | 1.35756  | 2.26144  |
| C  | 4.28210  | 0.45893  | -1.87655 |
| H  | 5.19378  | 1.07002  | -1.89222 |
| H  | 2.47289  | 2.36448  | -0.01911 |
| C  | 3.23018  | 1.17439  | -2.73201 |
| H  | 3.01744  | 2.18495  | -2.37603 |
| H  | 3.56791  | 1.25965  | -3.76966 |
| H  | 2.28518  | 0.62362  | -2.74351 |
| C  | 4.62763  | -0.90490 | -2.48436 |
| H  | 4.92649  | -0.79666 | -3.53180 |
| H  | 5.45003  | -1.39886 | -1.96235 |
| H  | 3.76860  | -1.58199 | -2.46178 |
| C  | 5.06304  | -0.64996 | 0.92048  |
| H  | 5.13014  | -1.59385 | 0.36369  |
| C  | 4.65525  | -1.00851 | 2.35361  |
| H  | 5.37276  | -1.70989 | 2.79143  |
| H  | 4.63185  | -0.12910 | 3.00066  |

|   |         |          |          |
|---|---------|----------|----------|
| H | 3.66951 | -1.47693 | 2.39749  |
| C | 6.45552 | -0.00759 | 0.89877  |
| H | 6.47779 | 0.92220  | 1.47283  |
| H | 7.19601 | -0.67781 | 1.34653  |
| H | 6.79722 | 0.22285  | -0.11334 |

## Compound 25

|    |          |          |          |
|----|----------|----------|----------|
| C  | -0.66568 | 4.27925  | -0.46659 |
| C  | -0.28741 | 3.80262  | -1.67009 |
| C  | 0.75555  | 2.84756  | -1.94171 |
| C  | -0.09164 | 3.95546  | 0.82117  |
| C  | 1.28910  | 1.94574  | -1.09895 |
| C  | 0.59679  | 2.86659  | 1.17921  |
| C  | 0.82014  | 1.63769  | 0.32284  |
| H  | -1.42405 | 5.05559  | -0.45639 |
| H  | -0.76549 | 4.23005  | -2.54575 |
| H  | 0.96381  | 2.81290  | 2.19813  |
| C  | 2.31442  | 0.98972  | -1.44384 |
| H  | 2.71442  | 0.91362  | -2.44686 |
| C  | 2.71080  | 0.22903  | -0.41392 |
| C  | 2.03634  | 0.74674  | 0.86966  |
| C  | 1.58925  | -0.31591 | 1.77858  |
| C  | 3.01387  | 1.58547  | 1.59338  |
| N  | 1.25893  | -1.14776 | 2.49364  |
| N  | 3.79997  | 2.22440  | 2.12977  |
| H  | -0.24871 | 4.69964  | 1.59670  |
| C  | 3.69171  | -0.86182 | -0.43212 |
| C  | 3.90503  | -1.57341 | -1.61949 |
| C  | 4.43067  | -1.22108 | 0.69864  |
| C  | 4.83821  | -2.59474 | -1.67690 |
| H  | 3.32047  | -1.33763 | -2.50082 |
| C  | 5.36484  | -2.24601 | 0.63908  |
| H  | 4.30096  | -0.69673 | 1.63734  |
| C  | 5.57413  | -2.93516 | -0.54707 |
| H  | 4.98449  | -3.13507 | -2.60513 |
| H  | 5.93105  | -2.50391 | 1.52658  |
| H  | 6.30117  | -3.73786 | -0.59083 |
| H  | 1.13950  | 2.84383  | -2.95792 |
| C  | -0.39742 | 0.82152  | 0.25582  |
| C  | -1.41118 | 0.17168  | 0.18320  |
| Si | -2.97434 | -0.82356 | 0.06042  |
| C  | -3.87331 | -0.59546 | 1.71691  |
| C  | -3.04616 | -1.07782 | 2.91341  |
| C  | -5.27106 | -1.22538 | 1.73937  |
| H  | -3.99626 | 0.48994  | 1.82082  |
| H  | -2.05358 | -0.62246 | 2.94049  |
| H  | -3.54756 | -0.83131 | 3.85465  |
| H  | -2.91050 | -2.16287 | 2.89866  |
| H  | -5.90074 | -0.88384 | 0.91409  |
| H  | -5.22045 | -2.31613 | 1.68559  |
| H  | -5.79129 | -0.97692 | 2.66976  |
| C  | -3.98895 | -0.08097 | -1.36021 |
| C  | -3.24551 | -0.10842 | -2.70076 |
| C  | -4.46556 | 1.34207  | -1.04549 |
| H  | -4.87817 | -0.71677 | -1.45905 |
| H  | -2.96984 | -1.11967 | -3.00615 |
| H  | -3.86891 | 0.31214  | -3.49616 |
| H  | -2.32758 | 0.48480  | -2.66003 |
| H  | -5.08553 | 1.38677  | -0.14753 |
| H  | -3.62171 | 2.02254  | -0.89807 |
| H  | -5.06153 | 1.74068  | -1.87256 |
| C  | -2.50061 | -2.64201 | -0.24113 |

|   |          |          |          |
|---|----------|----------|----------|
| C | -1.20563 | -2.83963 | -1.03795 |
| C | -3.64679 | -3.44106 | -0.87789 |
| H | -2.32841 | -3.05812 | 0.75942  |
| H | -0.35455 | -2.34461 | -0.56728 |
| H | -0.96687 | -3.90489 | -1.11948 |
| H | -1.28838 | -2.45007 | -2.05595 |
| H | -4.57796 | -3.37217 | -0.31151 |
| H | -3.85821 | -3.10004 | -1.89478 |
| H | -3.38468 | -4.50162 | -0.94272 |

### Compound *E*-24 (*s-trans*)

|    |          |          |          |
|----|----------|----------|----------|
| C  | 1.53813  | 1.29550  | -0.37410 |
| C  | 2.50922  | -1.03817 | -0.18600 |
| C  | 3.16169  | -3.41896 | -0.14892 |
| N  | 3.88411  | -4.29502 | 0.04463  |
| C  | 3.90013  | -0.67229 | 0.18569  |
| C  | 4.13801  | 0.01312  | 1.37780  |
| C  | 4.97599  | -1.01561 | -0.63235 |
| C  | 5.43272  | 0.34467  | 1.74602  |
| H  | 3.30554  | 0.27912  | 2.01875  |
| C  | 6.26903  | -0.66456 | -0.27090 |
| H  | 4.79991  | -1.53689 | -1.56622 |
| C  | 6.50016  | 0.01256  | 0.91956  |
| H  | 5.60897  | 0.86680  | 2.67935  |
| H  | 7.09696  | -0.92238 | -0.92107 |
| H  | 7.51113  | 0.28090  | 1.20420  |
| C  | 2.46860  | 4.38888  | -0.34498 |
| H  | 3.04790  | 5.30537  | -0.31777 |
| C  | 3.15368  | 3.22939  | -0.80698 |
| H  | 4.15120  | 3.41026  | -1.19459 |
| C  | 2.75676  | 1.93376  | -0.82081 |
| H  | 3.48128  | 1.25100  | -1.24205 |
| C  | 2.22422  | -2.37826 | -0.39058 |
| C  | 1.45815  | -0.07680 | -0.23347 |
| H  | 0.46137  | -0.48655 | -0.13195 |
| C  | 0.30659  | 2.07398  | -0.19748 |
| C  | 0.19123  | 3.42737  | -0.02179 |
| H  | -0.82210 | 3.76857  | 0.15993  |
| C  | 0.94103  | -2.81139 | -0.82310 |
| N  | -0.09368 | -3.17009 | -1.17976 |
| C  | 1.16152  | 4.46664  | 0.00149  |
| H  | 0.78069  | 5.44074  | 0.28817  |
| C  | -0.92894 | 1.35327  | -0.13433 |
| C  | -1.98851 | 0.77354  | -0.07022 |
| Si | -3.62947 | -0.09241 | 0.04362  |
| C  | -4.68655 | 0.95813  | 1.22094  |
| H  | -4.75577 | 1.92471  | 0.70506  |
| C  | -4.04901 | 1.22942  | 2.58797  |
| H  | -3.03450 | 1.62461  | 2.49967  |
| H  | -4.63990 | 1.96260  | 3.14627  |
| H  | -3.99936 | 0.32611  | 3.19969  |
| C  | -6.11523 | 0.42526  | 1.38594  |
| H  | -6.61531 | 0.25771  | 0.42883  |
| H  | -6.13076 | -0.51968 | 1.93490  |
| H  | -6.72734 | 1.13418  | 1.95221  |
| C  | -4.39130 | -0.08205 | -1.69531 |
| H  | -5.34621 | -0.61595 | -1.60559 |
| C  | -4.69689 | 1.33161  | -2.20267 |
| H  | -5.14427 | 1.29485  | -3.20094 |
| H  | -5.39447 | 1.86678  | -1.55481 |

|   |          |          |          |
|---|----------|----------|----------|
| H | -3.78755 | 1.93522  | -2.27854 |
| C | -3.52822 | -0.84042 | -2.71049 |
| H | -2.55097 | -0.36514 | -2.83518 |
| H | -3.35288 | -1.87826 | -2.41910 |
| H | -4.00973 | -0.85435 | -3.69329 |
| C | -3.24990 | -1.87567 | 0.56950  |
| H | -2.50679 | -2.20589 | -0.16706 |
| C | -4.45382 | -2.81955 | 0.45653  |
| H | -4.15005 | -3.85169 | 0.65795  |
| H | -5.23585 | -2.57012 | 1.17811  |
| H | -4.90718 | -2.80409 | -0.53721 |
| C | -2.59482 | -2.00202 | 1.94919  |
| H | -3.30098 | -1.78012 | 2.75273  |
| H | -2.23686 | -3.02379 | 2.11079  |
| H | -1.73869 | -1.33334 | 2.06707  |

**Compound E-24 (s-cis)**

|    |          |          |          |
|----|----------|----------|----------|
| C  | -1.69171 | 1.69740  | -0.27947 |
| C  | -2.74870 | -0.58210 | 0.13578  |
| C  | -5.09016 | -1.17970 | 0.63071  |
| N  | -6.02405 | -1.85133 | 0.57806  |
| C  | -2.45804 | -1.97164 | -0.29727 |
| C  | -2.75021 | -3.06325 | 0.52251  |
| C  | -1.84055 | -2.19384 | -1.53028 |
| C  | -2.43929 | -4.35119 | 0.11245  |
| H  | -3.19641 | -2.90428 | 1.49696  |
| C  | -1.54683 | -3.48364 | -1.94641 |
| H  | -1.60513 | -1.35113 | -2.17000 |
| C  | -1.84421 | -4.56443 | -1.12483 |
| H  | -2.65773 | -5.18967 | 0.76353  |
| H  | -1.08212 | -3.64513 | -2.91216 |
| H  | -1.60679 | -5.57214 | -1.44634 |
| C  | -2.45741 | 4.80957  | -0.67961 |
| H  | -2.98530 | 5.75266  | -0.77060 |
| C  | -3.22974 | 3.63611  | -0.91923 |
| H  | -4.23761 | 3.81487  | -1.27955 |
| C  | -2.90257 | 2.33418  | -0.74054 |
| H  | -3.68969 | 1.63478  | -0.99734 |
| C  | -3.97924 | -0.29145 | 0.70019  |
| C  | -1.67069 | 0.34455  | -0.00280 |
| H  | -0.69423 | -0.11680 | 0.06289  |
| C  | -0.41315 | 2.42176  | -0.26144 |
| C  | -0.21932 | 3.77547  | -0.29617 |
| H  | 0.81728  | 4.08121  | -0.20406 |
| C  | -4.22157 | 0.89376  | 1.44321  |
| N  | -4.43097 | 1.83851  | 2.06759  |
| C  | -1.13370 | 4.86156  | -0.40115 |
| H  | -0.68984 | 5.84421  | -0.28524 |
| C  | 0.77896  | 1.63871  | -0.13968 |
| C  | 1.78863  | 0.98030  | -0.03995 |
| Si | 3.31921  | -0.06334 | 0.10439  |
| C  | 4.27397  | 0.11252  | -1.52703 |
| H  | 5.15693  | -0.53181 | -1.42811 |
| C  | 4.76872  | 1.54242  | -1.77174 |
| H  | 5.43024  | 1.89716  | -0.97854 |
| H  | 5.32696  | 1.60222  | -2.71129 |
| H  | 3.93510  | 2.24694  | -1.84613 |
| C  | 3.46655  | -0.38743 | -2.73078 |
| H  | 3.16723  | -1.43298 | -2.62975 |
| H  | 2.55688  | 0.20317  | -2.87263 |
| H  | 4.05338  | -0.30445 | -3.65089 |
| C  | 4.33043  | 0.67438  | 1.53134  |
| H  | 4.53749  | 1.69778  | 1.19217  |
| C  | 3.57585  | 0.79071  | 2.86044  |
| H  | 4.15919  | 1.37258  | 3.58106  |
| H  | 2.60863  | 1.28530  | 2.74587  |
| H  | 3.39541  | -0.18774 | 3.31071  |
| C  | 5.68233  | -0.02080 | 1.73669  |
| H  | 5.55751  | -1.03788 | 2.11683  |
| H  | 6.26865  | -0.08345 | 0.81664  |
| H  | 6.28636  | 0.52274  | 2.46985  |
| C  | 2.70559  | -1.84980 | 0.30029  |
| H  | 2.02894  | -1.97890 | -0.55478 |
| C  | 1.88007  | -2.10130 | 1.56701  |
| H  | 1.40436  | -3.08616 | 1.52542  |
| H  | 2.50559  | -2.08600 | 2.46232  |
| H  | 1.08849  | -1.36094 | 1.70521  |
| C  | 3.81537  | -2.89968 | 0.16504  |
| H  | 4.52370  | -2.84953 | 0.99581  |

|   |         |          |          |
|---|---------|----------|----------|
| H | 3.39044 | -3.90833 | 0.16740  |
| H | 4.38597 | -2.79065 | -0.75996 |

### Compound Z-24 (*s-trans*)

|    |          |          |          |
|----|----------|----------|----------|
| C  | 2.48573  | 1.12007  | -1.05558 |
| C  | 2.13772  | -1.30221 | -0.42582 |
| C  | 1.72718  | -3.73218 | -0.24270 |
| N  | 1.56049  | -4.72325 | 0.31779  |
| C  | 1.99576  | -1.13527 | 1.03844  |
| C  | 0.88437  | -1.62952 | 1.72208  |
| C  | 3.01332  | -0.50648 | 1.75993  |
| C  | 0.78886  | -1.49271 | 3.09781  |
| H  | 0.07601  | -2.09490 | 1.17237  |
| C  | 2.92443  | -0.38691 | 3.13812  |
| H  | 3.88435  | -0.12657 | 1.24001  |
| C  | 1.81054  | -0.87591 | 3.80961  |
| H  | -0.08780 | -1.86537 | 3.61465  |
| H  | 3.72679  | 0.09047  | 3.68854  |
| H  | 1.73780  | -0.77515 | 4.88654  |
| C  | 2.84192  | 3.72636  | 0.62849  |
| H  | 2.89092  | 4.39887  | 1.47829  |
| C  | 1.70625  | 2.85962  | 0.59323  |
| H  | 0.89612  | 3.13873  | 1.25926  |
| C  | 1.48963  | 1.74840  | -0.16219 |
| C  | 1.94956  | -2.54189 | -0.99277 |
| C  | 2.61679  | -0.22018 | -1.24916 |
| H  | 3.20538  | -0.52026 | -2.11084 |
| C  | 3.82254  | 3.18567  | -1.59704 |
| H  | 4.45394  | 3.63464  | -2.35713 |
| C  | 2.02663  | -2.72728 | -2.40346 |
| N  | 2.08526  | -2.88222 | -3.54222 |
| C  | 3.76310  | 3.88912  | -0.34987 |
| H  | 4.49692  | 4.67706  | -0.21666 |
| C  | 3.25678  | 2.00264  | -1.91786 |
| H  | 3.47679  | 1.60278  | -2.90335 |
| C  | 0.17366  | 1.18909  | -0.15107 |
| C  | -0.97141 | 0.79877  | -0.17932 |
| Si | -2.75709 | 0.29731  | -0.24227 |
| C  | -3.73177 | 1.90302  | -0.53622 |
| H  | -3.31629 | 2.27606  | -1.48163 |
| C  | -3.11491 | -0.64596 | 1.36735  |
| H  | -2.37688 | -1.45842 | 1.35720  |
| C  | -2.98321 | -0.86103 | -1.72915 |
| H  | -4.05000 | -1.11889 | -1.74645 |
| C  | -5.23253 | 1.67722  | -0.75770 |
| H  | -5.73088 | 1.35253  | 0.15913  |
| H  | -5.71806 | 2.60613  | -1.07307 |
| H  | -5.43703 | 0.92787  | -1.52613 |
| C  | -3.50081 | 2.99718  | 0.51161  |
| H  | -3.95583 | 2.74107  | 1.47088  |
| H  | -2.43924 | 3.18471  | 0.68786  |
| H  | -3.95126 | 3.94019  | 0.18560  |
| C  | -2.87043 | 0.16321  | 2.64548  |
| H  | -1.88820 | 0.64111  | 2.65310  |
| H  | -3.62126 | 0.94563  | 2.77583  |
| H  | -2.92695 | -0.48477 | 3.52599  |
| C  | -4.50307 | -1.29776 | 1.39798  |
| H  | -4.61186 | -1.92640 | 2.28738  |
| H  | -5.29957 | -0.55067 | 1.43540  |
| H  | -4.68861 | -1.93229 | 0.52812  |
| C  | -2.19450 | -2.16712 | -1.58399 |
| H  | -1.11806 | -1.97880 | -1.53952 |
| H  | -2.46910 | -2.72517 | -0.68605 |
| H  | -2.37220 | -2.82370 | -2.44142 |
| C  | -2.65000 | -0.18186 | -3.06232 |
| H  | -1.60300 | 0.13269  | -3.09965 |

|   |          |          |          |
|---|----------|----------|----------|
| H | -2.81070 | -0.87065 | -3.89764 |
| H | -3.26591 | 0.70084  | -3.24736 |



## Compound Z-24 (*s-cis*)

|    |          |          |          |
|----|----------|----------|----------|
| C  | 2.49712  | 1.60440  | -0.56263 |
| C  | 2.24436  | -0.76080 | 0.39966  |
| C  | 0.94493  | -1.58694 | 2.32348  |
| N  | 0.34116  | -2.36917 | 2.91385  |
| C  | 2.39572  | -2.13378 | -0.14083 |
| C  | 2.85306  | -3.18529 | 0.65568  |
| C  | 2.11908  | -2.37478 | -1.48876 |
| C  | 3.01638  | -4.45327 | 0.11769  |
| H  | 3.11162  | -3.00761 | 1.69247  |
| C  | 2.26774  | -3.64617 | -2.02100 |
| H  | 1.76922  | -1.56304 | -2.11606 |
| C  | 2.71726  | -4.68808 | -1.21854 |
| H  | 3.38475  | -5.25822 | 0.74299  |
| H  | 2.03515  | -3.82347 | -3.06461 |
| H  | 2.84187  | -5.68056 | -1.63640 |
| C  | 1.88041  | 4.64213  | 0.10520  |
| H  | 1.50528  | 5.53440  | 0.59445  |
| C  | 0.99830  | 3.52325  | 0.12366  |
| H  | -0.01124 | 3.75528  | 0.44614  |
| C  | 1.20944  | 2.21089  | -0.19373 |
| C  | 1.65938  | -0.56628 | 1.63177  |
| C  | 2.82403  | 0.28228  | -0.39667 |
| H  | 3.68397  | -0.05321 | -0.96760 |
| C  | 3.69312  | 3.71811  | -1.32168 |
| H  | 4.52253  | 4.04744  | -1.93919 |
| C  | 1.74667  | 0.66268  | 2.33891  |
| N  | 1.83095  | 1.63841  | 2.94389  |
| C  | 3.06207  | 4.73950  | -0.54809 |
| H  | 3.56138  | 5.70250  | -0.53526 |
| C  | 3.44101  | 2.39015  | -1.33896 |
| H  | 4.09452  | 1.79493  | -1.96930 |
| C  | 0.04190  | 1.38509  | -0.18592 |
| C  | -0.99998 | 0.76970  | -0.20029 |
| Si | -2.68918 | -0.00088 | -0.26063 |
| C  | -3.81381 | 1.25119  | -1.13976 |
| H  | -4.80876 | 0.78845  | -1.16687 |
| C  | -3.22948 | -0.36909 | 1.52576  |
| H  | -2.73649 | -1.31622 | 1.77707  |
| C  | -2.54191 | -1.58078 | -1.30469 |
| H  | -2.00998 | -1.26158 | -2.21013 |
| C  | -3.94252 | 2.58534  | -0.39655 |
| H  | -2.97197 | 3.07692  | -0.28474 |
| H  | -4.59198 | 3.27213  | -0.94873 |
| H  | -4.36958 | 2.46879  | 0.60104  |
| C  | -3.37198 | 1.49364  | -2.58823 |
| H  | -2.37503 | 1.94183  | -2.62909 |
| H  | -3.34392 | 0.57564  | -3.17927 |
| H  | -4.05772 | 2.18345  | -3.09022 |
| C  | -2.76408 | 0.66414  | 2.55874  |
| H  | -1.68224 | 0.80700  | 2.53896  |
| H  | -3.22578 | 1.64128  | 2.39760  |
| H  | -3.03737 | 0.34219  | 3.56868  |
| C  | -4.74367 | -0.59462 | 1.63868  |
| H  | -5.01293 | -0.88949 | 2.65767  |
| H  | -5.30495 | 0.31506  | 1.40873  |
| H  | -5.10488 | -1.37823 | 0.96955  |
| C  | -3.89154 | -2.16065 | -1.74682 |
| H  | -4.46300 | -2.54824 | -0.89930 |
| H  | -4.51929 | -1.42758 | -2.25812 |
| H  | -3.74085 | -2.99736 | -2.43617 |
| C  | -1.69229 | -2.66383 | -0.63214 |
| H  | -2.18377 | -3.06315 | 0.25905  |

|   |          |          |          |
|---|----------|----------|----------|
| H | -1.52873 | -3.50531 | -1.31272 |
| H | -0.71019 | -2.29512 | -0.32971 |

**Compound E-26 (s-trans)**

|    |          |          |          |
|----|----------|----------|----------|
| C  | 2.45018  | 0.66582  | -0.34130 |
| C  | -0.71328 | -0.08324 | -0.47463 |
| C  | -0.05029 | 1.16731  | -0.20462 |
| H  | -0.72386 | 1.98812  | 0.01670  |
| C  | 1.26517  | 1.47514  | -0.15626 |
| H  | 1.47540  | 2.50938  | 0.09714  |
| C  | 1.28428  | -1.44388 | -1.13236 |
| H  | 1.50807  | -2.41201 | -1.56891 |
| C  | -0.10126 | -1.23074 | -0.88601 |
| H  | -0.74360 | -2.08096 | -1.08461 |
| C  | 2.36700  | -0.65678 | -0.90847 |
| H  | 3.30861  | -1.08844 | -1.21618 |
| C  | -2.13502 | -0.08270 | -0.32121 |
| C  | -3.33619 | -0.05440 | -0.18377 |
| Si | -5.18092 | -0.02552 | 0.02823  |
| C  | -5.76003 | 1.78440  | -0.06788 |
| H  | -5.87650 | 1.98607  | -1.14017 |
| C  | -4.75141 | 2.80454  | 0.47323  |
| H  | -5.12375 | 3.82356  | 0.32724  |
| H  | -4.57600 | 2.67705  | 1.54448  |
| H  | -3.78426 | 2.73043  | -0.02693 |
| C  | -7.13264 | 1.99090  | 0.58886  |
| H  | -7.48645 | 3.01315  | 0.42322  |
| H  | -7.89690 | 1.31647  | 0.19674  |
| H  | -7.08758 | 1.83834  | 1.67043  |
| C  | -5.88246 | -1.06847 | -1.39454 |
| H  | -5.40590 | -2.05049 | -1.28249 |
| C  | -5.49466 | -0.52811 | -2.77521 |
| H  | -5.83456 | -1.20582 | -3.56464 |
| H  | -5.95261 | 0.44553  | -2.97111 |
| H  | -4.41388 | -0.41246 | -2.88519 |
| C  | -7.39924 | -1.27598 | -1.30480 |
| H  | -7.73937 | -1.96923 | -2.08039 |
| H  | -7.71241 | -1.68708 | -0.34193 |
| H  | -7.94254 | -0.33937 | -1.45542 |
| C  | -5.56264 | -0.83342 | 1.70193  |
| H  | -6.65015 | -0.75543 | 1.82903  |
| C  | -4.90297 | -0.10868 | 2.88085  |
| H  | -5.21486 | 0.93453  | 2.95946  |
| H  | -5.16130 | -0.59642 | 3.82605  |
| H  | -3.81259 | -0.12080 | 2.79727  |
| C  | -5.19651 | -2.32223 | 1.72106  |
| H  | -5.44870 | -2.76853 | 2.68812  |
| H  | -5.72279 | -2.89288 | 0.95296  |
| H  | -4.12391 | -2.47184 | 1.56631  |
| C  | 3.65115  | 1.29183  | -0.04186 |
| H  | 3.57217  | 2.34971  | 0.18351  |
| C  | 4.96910  | 0.76906  | 0.01879  |
| C  | 6.05587  | 1.63171  | 0.04585  |
| C  | 5.90192  | 3.03306  | -0.13184 |
| C  | 7.38424  | 1.19357  | 0.29268  |
| N  | 5.77870  | 4.16897  | -0.27882 |
| N  | 8.47433  | 0.88225  | 0.49812  |
| C  | 5.24198  | -0.68591 | 0.15009  |
| C  | 6.03295  | -1.35276 | -0.78400 |
| C  | 4.71273  | -1.39223 | 1.23053  |
| C  | 6.27652  | -2.71265 | -0.64865 |
| H  | 6.44107  | -0.81192 | -1.63015 |
| C  | 4.97401  | -2.74641 | 1.37349  |
| H  | 4.10074  | -0.87618 | 1.96135  |
| C  | 5.75070  | -3.41056 | 0.43085  |
| H  | 6.88055  | -3.22607 | -1.38771 |

|   |         |          |         |
|---|---------|----------|---------|
| H | 4.56780 | -3.28553 | 2.22147 |
| H | 5.94659 | -4.47119 | 0.53908 |

**Compound E-26 (s-cis)**

|    |          |          |          |
|----|----------|----------|----------|
| C  | -2.37563 | -0.15520 | 0.06638  |
| C  | 0.83261  | 0.16749  | 0.42982  |
| C  | 0.05998  | -0.82759 | -0.27327 |
| H  | 0.65819  | -1.57036 | -0.78970 |
| C  | -1.27632 | -0.96514 | -0.41420 |
| H  | -1.58446 | -1.80799 | -1.02489 |
| C  | -1.03642 | 1.36006  | 1.59719  |
| H  | -1.17553 | 2.09721  | 2.38138  |
| C  | 0.32694  | 1.12684  | 1.25609  |
| H  | 1.04427  | 1.77652  | 1.74427  |
| C  | -2.18069 | 0.83465  | 1.09498  |
| H  | -3.09068 | 1.20051  | 1.55507  |
| C  | 2.25057  | 0.09526  | 0.25645  |
| C  | 3.44719  | 0.01773  | 0.09857  |
| Si | 5.28627  | -0.09571 | -0.13906 |
| C  | 5.60613  | -1.79081 | -0.93363 |
| H  | 4.94211  | -1.78777 | -1.80813 |
| C  | 5.19862  | -2.98587 | -0.06495 |
| H  | 5.23562  | -3.91259 | -0.64623 |
| H  | 5.87493  | -3.11386 | 0.78322  |
| H  | 4.18519  | -2.88769 | 0.33139  |
| C  | 7.03909  | -1.96657 | -1.45160 |
| H  | 7.13432  | -2.90777 | -2.00213 |
| H  | 7.34309  | -1.16413 | -2.12753 |
| H  | 7.76400  | -1.99990 | -0.63458 |
| C  | 5.78202  | 1.28227  | -1.34700 |
| H  | 6.86608  | 1.18199  | -1.48717 |
| C  | 5.51499  | 2.68388  | -0.78679 |
| H  | 5.82536  | 3.45127  | -1.50287 |
| H  | 4.45045  | 2.83920  | -0.58826 |
| H  | 6.05466  | 2.87234  | 0.14378  |
| C  | 5.11879  | 1.11977  | -2.71966 |
| H  | 5.44859  | 1.90753  | -3.40412 |
| H  | 5.35554  | 0.16218  | -3.18860 |
| H  | 4.02970  | 1.18994  | -2.64612 |
| C  | 6.05433  | 0.22944  | 1.56622  |
| H  | 5.70202  | 1.23963  | 1.81239  |
| C  | 7.58729  | 0.27433  | 1.54224  |
| H  | 7.97658  | 0.96159  | 0.78703  |
| H  | 7.97732  | 0.60210  | 2.51092  |
| H  | 8.01592  | -0.71113 | 1.34275  |
| C  | 5.55759  | -0.69853 | 2.68028  |
| H  | 5.91522  | -0.35139 | 3.65486  |
| H  | 4.46706  | -0.74147 | 2.72741  |
| H  | 5.92305  | -1.71928 | 2.54989  |
| C  | -3.63292 | -0.49365 | -0.40356 |
| H  | -3.69423 | -1.42027 | -0.96373 |
| C  | -4.89170 | 0.14447  | -0.20463 |
| C  | -5.07682 | 1.51462  | -0.09911 |
| C  | -4.07542 | 2.45310  | -0.46023 |
| C  | -6.30614 | 2.09565  | 0.32251  |
| N  | -3.28162 | 3.22824  | -0.76994 |
| N  | -7.27136 | 2.60979  | 0.68362  |
| C  | -6.07589 | -0.74997 | -0.18777 |
| C  | -6.05320 | -1.91039 | 0.58900  |
| C  | -7.20163 | -0.47541 | -0.96642 |
| C  | -7.14519 | -2.76500 | 0.60659  |
| H  | -5.18094 | -2.13258 | 1.19289  |
| C  | -8.28537 | -1.34087 | -0.96188 |
| H  | -7.21984 | 0.40335  | -1.60007 |
| C  | -8.26237 | -2.48259 | -0.17036 |
| H  | -7.12283 | -3.65457 | 1.22538  |

|   |          |          |          |
|---|----------|----------|----------|
| H | -9.14784 | -1.12510 | -1.58175 |
| H | -9.11242 | -3.15531 | -0.16349 |

### Compound Z-26 (*s-trans*)

|    |          |          |          |
|----|----------|----------|----------|
| C  | -2.74234 | -1.63003 | 0.10006  |
| C  | -4.92438 | -0.32109 | -0.00301 |
| C  | -7.18306 | 0.65736  | -0.16873 |
| N  | -7.93827 | 1.52739  | -0.15607 |
| C  | -4.37005 | 1.05442  | 0.09369  |
| C  | -4.50186 | 1.95469  | -0.96232 |
| C  | -3.72035 | 1.45602  | 1.26104  |
| C  | -3.97428 | 3.23441  | -0.85852 |
| H  | -4.99854 | 1.64711  | -1.87542 |
| C  | -3.21151 | 2.74132  | 1.36890  |
| H  | -3.61986 | 0.76037  | 2.08623  |
| C  | -3.33147 | 3.63071  | 0.30717  |
| H  | -4.06843 | 3.92302  | -1.69016 |
| H  | -2.71718 | 3.04863  | 2.28321  |
| H  | -2.92522 | 4.63231  | 0.38948  |
| C  | 0.49915  | -1.42168 | 0.08888  |
| C  | -0.50817 | -0.52934 | -0.42767 |
| H  | -0.10640 | 0.36442  | -0.89298 |
| C  | -1.85804 | -0.61300 | -0.42375 |
| H  | -2.35287 | 0.21714  | -0.90742 |
| C  | -6.29474 | -0.45086 | -0.18048 |
| C  | -4.11923 | -1.47716 | 0.16618  |
| H  | -4.66944 | -2.38553 | 0.38625  |
| C  | -0.97032 | -3.36016 | 0.68139  |
| H  | -0.88303 | -4.39084 | 1.00921  |
| C  | -6.91009 | -1.72097 | -0.34489 |
| N  | -7.40975 | -2.74995 | -0.48133 |
| C  | 0.27285  | -2.67774 | 0.57070  |
| H  | 1.14273  | -3.24290 | 0.88512  |
| C  | -2.24020 | -2.92808 | 0.47928  |
| H  | -3.01264 | -3.66706 | 0.66705  |
| C  | 1.84632  | -0.94453 | 0.03743  |
| C  | 2.98027  | -0.52678 | -0.01216 |
| Si | 4.73215  | 0.08662  | -0.09505 |
| C  | 4.74121  | 1.47569  | -1.38817 |
| H  | 4.39746  | 0.97014  | -2.30010 |
| C  | 6.14249  | 2.02934  | -1.67651 |
| H  | 6.11453  | 2.72070  | -2.52453 |
| H  | 6.53908  | 2.58654  | -0.82401 |
| H  | 6.86325  | 1.24533  | -1.92135 |
| C  | 3.75541  | 2.61734  | -1.11615 |
| H  | 3.69687  | 3.28470  | -1.98181 |
| H  | 2.74530  | 2.25380  | -0.91382 |
| H  | 4.06483  | 3.22612  | -0.26379 |
| C  | 5.21308  | 0.54191  | 1.68442  |
| H  | 4.99207  | -0.37434 | 2.24749  |
| C  | 4.36990  | 1.66239  | 2.30282  |
| H  | 4.57396  | 1.74839  | 3.37476  |
| H  | 4.59999  | 2.63184  | 1.85513  |
| H  | 3.29734  | 1.48973  | 2.18612  |
| C  | 6.70865  | 0.83408  | 1.85863  |
| H  | 6.95120  | 0.96996  | 2.91725  |
| H  | 7.34130  | 0.02689  | 1.48245  |
| H  | 7.00439  | 1.75113  | 1.34315  |
| C  | 5.80096  | -1.36178 | -0.69869 |
| H  | 6.82934  | -0.98002 | -0.73491 |
| C  | 5.42697  | -1.82176 | -2.11231 |
| H  | 5.53082  | -1.02580 | -2.85285 |
| H  | 6.06956  | -2.64814 | -2.43197 |
| H  | 4.39418  | -2.17984 | -2.15557 |
| C  | 5.78027  | -2.54847 | 0.27193  |
| H  | 6.42832  | -3.35338 | -0.08864 |

|   |         |          |         |
|---|---------|----------|---------|
| H | 6.12497 | -2.27838 | 1.27254 |
| H | 4.77344 | -2.96435 | 0.37145 |



## Compound Z-26 (s-cis)

|    |          |          |          |
|----|----------|----------|----------|
| C  | 2.49438  | -1.26189 | -0.54966 |
| C  | 4.61988  | 0.12531  | -0.32476 |
| C  | 4.88050  | 2.56188  | -0.04002 |
| N  | 5.38549  | 3.50997  | 0.37523  |
| C  | 5.98817  | -0.10785 | 0.20051  |
| C  | 6.18122  | -1.02230 | 1.23833  |
| C  | 7.09562  | 0.54227  | -0.34708 |
| C  | 7.45329  | -1.26136 | 1.73612  |
| H  | 5.32666  | -1.53392 | 1.66595  |
| C  | 8.36923  | 0.28800  | 0.13963  |
| H  | 6.96520  | 1.22901  | -1.17501 |
| C  | 8.54965  | -0.60790 | 1.18626  |
| H  | 7.58930  | -1.96103 | 2.55263  |
| H  | 9.22313  | 0.78790  | -0.30269 |
| H  | 9.54511  | -0.80115 | 1.56954  |
| C  | -0.74254 | -1.18567 | -0.35919 |
| C  | 0.25693  | -0.31173 | 0.20580  |
| H  | -0.15048 | 0.50831  | 0.78720  |
| C  | 1.60450  | -0.33718 | 0.11427  |
| H  | 2.10366  | 0.45895  | 0.65381  |
| C  | 4.19457  | 1.42484  | -0.55321 |
| C  | 3.85895  | -1.04272 | -0.62237 |
| H  | 4.46168  | -1.90433 | -0.88818 |
| C  | 0.76320  | -2.99860 | -1.21192 |
| H  | 0.69259  | -3.99533 | -1.63508 |
| C  | 3.07311  | 1.73168  | -1.36708 |
| N  | 2.17920  | 1.99904  | -2.04252 |
| C  | -0.49624 | -2.37460 | -0.97922 |
| H  | -1.36031 | -2.93565 | -1.31639 |
| C  | 2.02528  | -2.54173 | -1.02480 |
| H  | 2.81542  | -3.22775 | -1.31366 |
| C  | -2.10033 | -0.76392 | -0.20522 |
| C  | -3.24266 | -0.39233 | -0.06477 |
| Si | -4.99002 | 0.19934  | 0.14402  |
| C  | -4.93305 | 1.70784  | 1.29341  |
| H  | -5.97683 | 2.01889  | 1.42901  |
| C  | -4.17521 | 2.88171  | 0.66207  |
| H  | -4.18039 | 3.74835  | 1.33054  |
| H  | -3.12855 | 2.62584  | 0.47302  |
| H  | -4.61232 | 3.20012  | -0.28667 |
| C  | -4.35948 | 1.38682  | 2.67820  |
| H  | -4.35587 | 2.28026  | 3.31062  |
| H  | -4.93484 | 0.62154  | 3.20260  |
| H  | -3.32646 | 1.03393  | 2.61093  |
| C  | -5.57577 | 0.70463  | -1.59069 |
| H  | -4.83399 | 1.43767  | -1.93152 |
| C  | -6.94489 | 1.39519  | -1.59568 |
| H  | -7.18380 | 1.76827  | -2.59647 |
| H  | -7.74461 | 0.70480  | -1.31484 |
| H  | -6.99005 | 2.24673  | -0.91232 |
| C  | -5.55665 | -0.46014 | -2.58631 |
| H  | -5.79814 | -0.11074 | -3.59506 |
| H  | -4.57993 | -0.94746 | -2.63339 |
| H  | -6.29515 | -1.22403 | -2.32741 |
| C  | -6.02030 | -1.23709 | 0.84823  |
| H  | -6.29804 | -1.83849 | -0.02660 |
| C  | -7.32131 | -0.75199 | 1.50312  |
| H  | -7.92654 | -0.13399 | 0.83657  |
| H  | -7.93902 | -1.60323 | 1.80574  |
| H  | -7.12358 | -0.16342 | 2.40300  |
| C  | -5.25471 | -2.16184 | 1.80211  |
| H  | -5.88553 | -3.00341 | 2.10597  |

|   |          |          |         |
|---|----------|----------|---------|
| H | -4.35430 | -2.57202 | 1.34148 |
| H | -4.94848 | -1.64464 | 2.71493 |

## Transition State Calculations

*s-cis*-VHF to TS activation energies (kJ/mol):

|           | "24-SiMe <sub>3</sub> " | "26-SiMe <sub>3</sub> " |
|-----------|-------------------------|-------------------------|
| CAM-B3LYP | 91.5                    | 94.9                    |
| M06-2X    | 92.4                    | 93.4                    |
| PBE0      | 82.1                    | 84.8                    |

### Geometries:

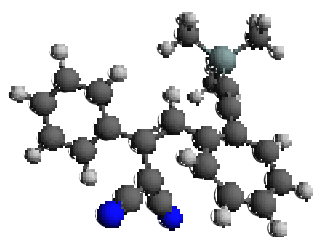

"24-SiMe<sub>3</sub>"-TS

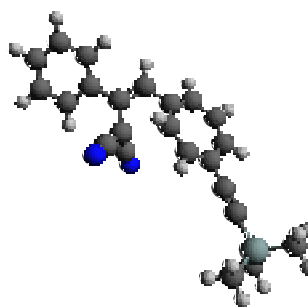

"26-SiMe<sub>3</sub>"-TS

### Coordinates:

"24-SiMe<sub>3</sub>"-TS:

|   |             |             |             |
|---|-------------|-------------|-------------|
| C | 0.73132900  | 4.37204000  | -0.07668200 |
| C | 1.48506800  | 3.24780600  | -0.16984200 |
| C | 1.08025400  | 1.88735000  | -0.38660600 |
| C | -0.17712400 | 1.42808200  | -0.72107000 |
| C | -1.36517900 | 2.20483600  | -0.95060900 |
| C | -1.57767900 | 3.57822800  | -0.65916600 |
| C | -0.67380100 | 4.50822900  | -0.24889300 |
| C | -0.47957600 | -0.00282800 | -0.75730400 |
| C | -1.67108600 | -0.36611500 | -0.25040500 |
| C | -2.50773900 | 0.74318400  | 0.32421800  |
| C | -2.19680500 | 1.21544600  | 1.61876000  |
| N | -1.94252100 | 1.60166600  | 2.67744800  |
| C | -3.86281600 | 0.85748100  | -0.06342800 |
| N | -4.95113500 | 0.97802500  | -0.43021200 |
| H | 1.26494200  | 5.28847600  | 0.14849700  |
| H | 2.54965300  | 3.37265900  | -0.00706000 |
| H | -2.02961200 | 1.79175100  | -1.69688300 |
| H | -2.58876700 | 3.92939200  | -0.83810900 |
| H | 0.26859400  | -0.72203700 | -1.06210400 |

|    |             |             |             |
|----|-------------|-------------|-------------|
| C  | -2.13816800 | -1.76428500 | -0.19430200 |
| C  | -2.99917100 | -2.19209200 | 0.81941500  |
| C  | -1.72178400 | -2.68969100 | -1.15630000 |
| C  | -3.41016500 | -3.51543600 | 0.88578700  |
| H  | -3.34106600 | -1.48962300 | 1.57087300  |
| C  | -2.13763400 | -4.01052600 | -1.09230400 |
| H  | -1.08601200 | -2.36674400 | -1.97266100 |
| C  | -2.98020800 | -4.42883300 | -0.06864300 |
| H  | -4.07054100 | -3.83314300 | 1.68454800  |
| H  | -1.81170900 | -4.71385400 | -1.85012100 |
| H  | -3.30785500 | -5.46109800 | -0.02087000 |
| H  | -1.05966500 | 5.51300800  | -0.11146000 |
| C  | 2.12352400  | 0.92267200  | -0.22673400 |
| C  | 3.02135000  | 0.12648900  | -0.07675500 |
| Si | 4.39127800  | -1.10170600 | 0.17068300  |
| C  | 3.62902900  | -2.67857600 | 0.83017200  |
| H  | 2.96853900  | -3.14337500 | 0.09434200  |
| H  | 4.40781500  | -3.40404900 | 1.08083000  |
| H  | 3.04498100  | -2.49371200 | 1.73456200  |
| C  | 5.60248800  | -0.36725100 | 1.39371100  |
| H  | 5.93501800  | 0.62518500  | 1.08087800  |
| H  | 5.16052200  | -0.27395000 | 2.38850500  |
| H  | 6.48931400  | -1.00058800 | 1.48339900  |
| C  | 5.20170200  | -1.39024600 | -1.49130600 |
| H  | 4.46811900  | -1.66336900 | -2.25331500 |
| H  | 5.73154900  | -0.50058800 | -1.83996600 |
| H  | 5.92900400  | -2.20408400 | -1.42438000 |

“26-SiMe<sub>3</sub>”-TS:

|   |             |             |             |
|---|-------------|-------------|-------------|
| C | -1.74203000 | 2.48650000  | 0.19671300  |
| C | -0.62282300 | 3.26366500  | 0.17596600  |
| C | 0.70359000  | 2.91449200  | -0.17265000 |
| C | 1.17912600  | 1.73889700  | -0.68221700 |
| C | 0.40042700  | 0.62407500  | -1.14694900 |
| C | -0.95818000 | 0.35994600  | -0.88591200 |
| C | -1.89764000 | 1.13632000  | -0.23977100 |
| C | 2.60718300  | 1.46668700  | -0.65914700 |
| C | 3.00164200  | 0.22100500  | -0.32920500 |
| C | 1.92006900  | -0.81933900 | -0.17619100 |
| C | 1.53227200  | -1.12629200 | 1.14759100  |
| N | 1.21669700  | -1.29375800 | 2.24689300  |
| C | 1.77839900  | -1.85092900 | -1.12771000 |
| N | 1.63093100  | -2.65320400 | -1.94683600 |
| H | -2.64353500 | 2.95113700  | 0.57844200  |
| H | -0.74760900 | 4.27676100  | 0.54231000  |
| H | 1.44965400  | 3.67424400  | 0.03933800  |
| H | 0.79809900  | 0.12520300  | -2.01930300 |

|    |             |             |             |
|----|-------------|-------------|-------------|
| H  | -1.31914700 | -0.58457100 | -1.27945000 |
| H  | 3.30675000  | 2.29039300  | -0.73297200 |
| C  | 4.40415100  | -0.11176200 | 0.01029800  |
| C  | 4.86070400  | -1.43225900 | -0.03117500 |
| C  | 5.31069600  | 0.88690300  | 0.38954300  |
| C  | 6.18026000  | -1.74162800 | 0.26983900  |
| H  | 4.18906200  | -2.23277400 | -0.31231800 |
| C  | 6.62698700  | 0.57813000  | 0.69032000  |
| H  | 4.98215700  | 1.91532700  | 0.47556400  |
| C  | 7.06953600  | -0.73874800 | 0.62848500  |
| H  | 6.51148100  | -2.77278600 | 0.22320000  |
| H  | 7.30795800  | 1.36764300  | 0.98727400  |
| H  | 8.09887100  | -0.98039900 | 0.86772700  |
| C  | -3.20755600 | 0.58009800  | -0.09082900 |
| C  | -4.31237900 | 0.10628700  | 0.03674800  |
| Si | -6.00167700 | -0.65696900 | 0.21718300  |
| C  | -5.97392300 | -1.73210500 | 1.74561300  |
| H  | -5.27446400 | -2.56429500 | 1.63800100  |
| H  | -5.68432200 | -1.16377500 | 2.63238500  |
| H  | -6.96546400 | -2.15395200 | 1.93160700  |
| C  | -6.31667800 | -1.66752300 | -1.31586800 |
| H  | -7.29279400 | -2.15743100 | -1.26172400 |
| H  | -6.30954100 | -1.04577300 | -2.21417600 |
| H  | -5.56293600 | -2.44786700 | -1.44415900 |
| C  | -7.24629900 | 0.73433500  | 0.38859500  |
| H  | -7.03561100 | 1.35678600  | 1.26126000  |
| H  | -7.24787300 | 1.38098800  | -0.49185600 |
| H  | -8.25588200 | 0.33091400  | 0.50537700  |
